# Supplementary material for: ‘Just like a normal pain’, what do people with diabetes mellitus experience when having a myocardial infarction: a qualitative study recruited from UK hospitals
Source: PubMed Central journal article supplement — BMJ Open. 2017 Sep 15;7(9):e015736. doi: 10.1136/bmjopen-2016-015736 (PMC5640147; doi:10.1136/bmjopen-2016-015736), 2017-09-15
Supplement: bmjopen-2016-015736.draft_revisions.pdf [file bmjopen-2016-015736.draft_revisions.pdf]

# BMJ Open

BMJ Open is committed to open peer review. As part of this commitment we make the peer review history of every article we publish publicly available.

When an article is published we post the peer reviewers' comments and the authors' responses online. We also post the versions of the paper that were used during peer review. These are the versions that the peer review comments apply to.

The versions of the paper that follow are the versions that were submitted during the peer review process. They are not the versions of record or the final published versions. They should not be cited or distributed as the published version of this manuscript.

BMJ Open is an open access journal and the full, final, typeset and author-corrected version of record of the manuscript is available on our site with no access controls, subscription charges or pay-per-view fees (<http://bmjopen.bmj.com>).

If you have any questions on BMJ Open's open peer review process please email [info.bmjopen@bmj.com](mailto:info.bmjopen@bmj.com)

# BMJ Open

**“Just like a normal pain”- experiences of myocardial infarction among people with diabetes mellitus - a qualitative study.**

|                                 |                                                                                                                                                                                                                                                                                                                                                                      |
|---------------------------------|----------------------------------------------------------------------------------------------------------------------------------------------------------------------------------------------------------------------------------------------------------------------------------------------------------------------------------------------------------------------|
| Journal:                        | <i>BMJ Open</i>                                                                                                                                                                                                                                                                                                                                                      |
| Manuscript ID                   | bmjopen-2016-015736                                                                                                                                                                                                                                                                                                                                                  |
| Article Type:                   | Research                                                                                                                                                                                                                                                                                                                                                             |
| Date Submitted by the Author:   | 06-Jan-2017                                                                                                                                                                                                                                                                                                                                                          |
| Complete List of Authors:       | Berman, Nikita; Plymouth Hospitals NHS Trust; UCL, Research Department of Primary Care and Population Health<br>Jones, Melvyn; UCL, Research Department of Primary Care and Population Health; Warden Lodge Surgery,<br>De Coster, Daan; Princess Royal Hospital, Bromley, King's College NHS Trust ; UCL, Research Department of Primary Care and Population Health |
| <b>Primary Subject Heading</b>: | Cardiovascular medicine                                                                                                                                                                                                                                                                                                                                              |
| Secondary Subject Heading:      | Diabetes and endocrinology, Qualitative research, Emergency medicine, General practice / Family practice                                                                                                                                                                                                                                                             |
| Keywords:                       | Chest pain, Myocardial infarction < CARDIOLOGY, Diabetic nephropathy & vascular disease < DIABETES & ENDOCRINOLOGY                                                                                                                                                                                                                                                   |
|                                 |                                                                                                                                                                                                                                                                                                                                                                      |

SCHOLARONE™  
Manuscripts

Only

1  
2  
3  
4  
5  
6  
7  
8 **“Just like a normal pain”- experiences of myocardial**  
9 **infarction among people with diabetes mellitus - a**  
10 **qualitative study.**  
11  
12  
13  
14  
15  
16  
17  
18  
19  
20  
21  
22  
23  
24  
25  
26  
27

28 Dr Nikita Berman (1) (2), Dr Melvyn M Jones (1), Dr Daan A De Coster (3)  
29  
30  
31  
32

33 Corresponding author: Dr Melvyn Jones ORCID ID 0000-0002-8766-7443  
34 Email: [melvyn.jones@ucl.ac.uk](mailto:melvyn.jones@ucl.ac.uk)  
35  
36  
37

- 38 1. Research Department of Primary Care and Population Health  
39 UCL Medical School, London, UK.  
40
- 41 2. Plymouth Hospitals NHS Trust  
42 Derriford Road, Crownhill, Plymouth, Devon, PL6 8DH, UK  
43  
44
- 45 3. Princess Royal Hospital Bromley, King's College NHS Trust, UK  
46  
47  
48  
49  
50  
51  
52  
53  
54  
55  
56  
57  
58  
59  
60

## Abstract

**Objective:** The objective of the study was to investigate the symptoms people with diabetes experience when having a myocardial infarction, their illness narrative, and how they present to health services.

**Setting:** Secondary care -3 London (UK) hospitals- Coronary care units (CCU) and medical wards.

**Participants:** Patients were recruited from CCU with diabetes (Type 1 & 2) with a clinical presentation of MI (STEMI, NSTEMI, acute MI unspecified and cardiac arrest). 43 participants were recruited, 39 interviews meeting the detailed study criteria were used in the analysis. They were predominantly male (n=30), aged 40-90 years and white British (18/39), just under a half were from other ethnic groups. The majority had type II DM (n=35); 24 had had a non ST elevated myocardial infarction (NSTEMI), 10 had a ST elevated myocardial infarction (STEMI) and 5 had other cardiac events (Acute MI unspecified).

**Definitions of selection and exclusion criteria:** Eligibility criteria included a diagnosis of MI (AHA criteria), and DM, the ability to communicate enough English to complete the interview. Ward staff made a clinical judgement (ethics requirement) that the participant was post-treatment, clinically stable and well enough to participate.

**Results:** While most participants did experience chest pain, it was often not their most striking symptom. As their chest pain did not match their expectations of what a “heart attack” should be, participants developed narratives to explain these symptoms, including the symptoms being effects of their DM (“hypos”), side effects of medication (oral hypoglycaemics) or symptoms (such as breathlessness and indigestion) related to other comorbidities; often leading to a delay in seeking care.

**Conclusions:**

1  
2  
3  
4  
5  
6  
7  
8  
9  
10  
11  
12  
13  
14  
15  
16  
17  
18  
19  
20  
21  
22  
23  
24  
25  
26  
27  
28  
29  
30  
31  
32  
33  
34  
35  
36  
37  
38  
39  
40  
41  
42  
43  
44  
45  
46  
47  
48  
49  
50  
51  
52  
53  
54  
55  
56  
57  
58  
59  
60

While truly absent chest pain during MI among people with DM was rare in this study, patients' attenuated symptoms often led to delay in seeking attention, diagnostic confusion and delayed treatment from doctors.

For peer review only

1  
2  
3 **Data sharing:** - No additional data available.  
4  
5

6 **Article summary**  
7

8 Strengths and weaknesses  
9

10  
11 This is a study of people with diabetes experiencing an MI

12 Strengths of the study include:

- 13  
14 • contemporaneous patients' descriptions of their symptoms and illness  
15 narrative just after an MI,  
16  
17 • a model of how attenuated MI symptoms might alter help seeking behaviour,  
18  
19 • the participants were from a wide demographic background in terms of age,  
20 ethnicity and disease burden.  
21  
22

23  
24 Weaknesses include  
25

- 26 • that by recruiting patients from CCU means we will not have captured  
27 markedly discrepant presentations,  
28  
29 • by recruiting on the basis of the ability to communicate in English means we  
30 will have lost some cultural and linguistic nuance in symptom presentation.  
31  
32  
33  
34  
35  
36  
37  
38  
39  
40  
41  
42  
43  
44  
45  
46  
47  
48  
49  
50  
51  
52  
53  
54  
55  
56  
57  
58  
59  
60

## Background

Diabetes Mellitus (DM) is a common health problem worldwide and affects 4-6% of the UK population.<sup>1</sup> Cardiovascular disease (CVD) is the major life threatening complication of DM in the UK.<sup>2 3 4</sup> Myocardial infarction (MI) is the principal cause of excess mortality among those with DM, with a 3-fold increased risk of coronary heart disease (CHD) mortality,<sup>5 6</sup> a 6-fold increased risk of myocardial infarction (MI)<sup>7</sup> and a worse prognosis from MI compared with non-diabetic populations.<sup>8</sup>

Possible mechanisms of this excess mortality risk include comorbidities such as hypertension, dyslipidaemia and chronic kidney disease. An important element in this observed increased mortality may be late or missed presentation by patients, and diagnosis by clinicians.

Up to a third of people who suffer an MI can have no chest pain; however people with DM make up a larger proportion of this group (32.6% vs 25.4% in one study).<sup>9</sup> However, when people with DM do have symptoms of an MI, their symptoms may often be atypical<sup>10</sup> or unusual.<sup>11</sup>

Nevertheless, there is conflicting evidence around this issue: Funk found no statistically significant difference in CHD symptom presentation in people with and without DM, but did report non-significant increases in dyspnoea, neck and throat pain among those with DM.<sup>12</sup> Kentsch found no differences between these groups in the frequency or severity of chest pain but also identified differences in the prevalence of dyspnoea.<sup>13</sup> One review found conflicting results about MI symptoms among women with and without DM.<sup>14</sup>

There are several methodological reasons why these studies may have conflicting results: being underpowered,<sup>15 16</sup> being unrepresentative of the population at risk<sup>15</sup>, or recruited from highly selected hospital populations.<sup>17</sup> Survivor bias (i.e. living to tell the tale of your symptoms) may also be an important issue in a condition such as MI which has a high early mortality.

### Clinician classification

The way clinicians ask about chest symptoms may also be problematic. Clinicians ask about “chest pain”, however the term “pain”,<sup>18 19</sup> is often not used by patients experiencing MI.

There is a biological basis for altered perception of pain among diabetics in that cardiac autonomic neuropathy (CAN) is a complication of DM and leads to altered pain perception, meaning a patient might not experience pain caused by myocardial ischaemia.<sup>20</sup>

In the current study, we aimed to address some of the limitations of previous research by recruiting only DM patients with clear evidence of a recent MI, regardless of their chest pain presentation, and use of a qualitative methodology to explore how these patients describe their symptoms. Qualitative methods can help overcome a narrow clinician focus and help develop a patient orientated view when exploring symptoms of disease.<sup>21 22 23</sup>



## Methods

This was a qualitative study where interviews were undertaken with patients with DM who have recently had a confirmed MI, recruited within coronary care units (CCU). Eligibility criteria included a confirmed diagnosis of MI (according to AHA criteria <sup>24</sup>), a clinical diagnosis of DM and the ability to communicate (understand and speak) enough English to complete the interview. Clinical staff ensured the participant was post-treatment, clinically stable and well enough to participate. This subjective judgement was made by the clinical staff involved in participants' care as required by the ethics committee. Participants were approached as soon as possible after the diagnosis so we could be sure that they had had an MI (usually a retrospective or working diagnosis) and to minimise recall bias about symptoms. Once invited, they were given 24 hours to decide whether to participate (see comments regarding ethics approval). The interviews took place in three London, UK hospitals. We aimed to recruit consecutive patients (but this proved unworkable) so this was a pragmatic sample.

The interviews were semi-structured, iterative interviews building from a topic guide based on Funk's acute myocardial infarction (AMI) symptom list <sup>12</sup> to include a narrative of the course, range, character and severity of the symptoms the person experienced before and during their MI. A checklist of AMI symptoms was worked through to ensure symptoms were absent and not just omitted. Ideas about expected symptoms of an MI, and symptom attribution were also explored as people often develop complex narratives about their illnesses. <sup>25</sup> We also explored participants' thoughts about their illness, treatments they had attempted, motives and triggers for seeking help, awareness and knowledge of the symptoms of a heart attack.

Interviews were audio recorded, field notes and baseline patient information were noted. Details gathered included the type of MI (ECG changes, troponin level, clinical assessment), the patients' demographics, co-morbidities (type and duration of DM, other disease), risk factors, family history, medication use and information that might impact on symptom perception, from the informant and their medical records. All participants were allocated a code number to link their data together and then

1  
2  
3 anonymised (apart from the consent form) so that identifiable data did not leave the  
4 ward setting.  
5  
6

7 The audio taped interviews were transcribed verbatim and manually analysed using  
8 the thematic framework.<sup>26</sup> Two independent researchers (NT, DDC) read the  
9 transcripts and analysed the data using the following steps: familiarisation,  
10 identifying a thematic framework, indexing, charting, mapping and interpretation.  
11 Throughout this process, transcripts were repeatedly re-read to focus on specific  
12 points and ideas, to verify the presence of the themes that are identified and ensure  
13 the context of the themes has been preserved. Disagreements were resolved by  
14 discussion with a third team member (MJ). Agreement was specifically sought  
15 between reviewers about the classification of symptoms as either typical or atypical  
16 as outlined by Funk.<sup>12</sup> This is distinct to Diamond and Forrester's classification of  
17 angina typicality.<sup>27</sup> Representative quotes (with consent) were used and have  
18 identifying details to link the theme to the interview transcript.  
19  
20  
21  
22  
23  
24  
25  
26

27  
28 The lay term "heart attack" is used extensively in the transcripts, this can have a  
29 broad popular meaning but we will assume is used by participants to suggest a  
30 myocardial infarction.  
31  
32

33  
34 Ethical approval for this study and the use of quotes was obtained from the  
35 Hertfordshire Research Ethics Committee. (Project no: 11/EE/0045). The committee  
36 requested that we allowed a "cool off" period of 24 hours from approach to obtaining  
37 consent. Data protection and local hospital trust R&D policies were followed.  
38 Consent was not originally sought to disclose the full interview transcripts.  
39  
40  
41  
42

### 43 Patient involvement

44

45 The original idea for this study was based on a clinical encounter in general practice.  
46 A patient consulted MJ his GP, having suffered a severe MI despite having minimal  
47 symptoms and subsequently developed severe heart failure. Before his death, this  
48 patient agreed to support research in this area and filmed a brief video of his  
49 experiences. A broader study (with same research question but a different  
50 methodology) on this field was presented and supported by the North East London  
51 Diabetes Research Network Lay Panel Meeting in 2011. Patients' narratives  
52 constitute the data underlying this study.  
53  
54  
55  
56  
57  
58  
59  
60

## Results

Forty three participants were recruited from the participating hospitals, however 4 interviews proved unusable due to not meeting study recruitment criteria on detailed case review and were excluded resulting in a total of 39 participants. The interviews had a mean duration of 20mins 33 sec (with a range of 5 mins 14 secs to 48mins 46 secs) and were all undertaken by one interviewer; NB. The study comprised of 30 men and 9 women; with an age range of 40-90, 35 participants had type 2 DM and 4 had type 1 DM. All participants had confirmed acute coronary syndrome; 24 had NSTEMIs, 10 had STEMIs and 5 had other MIs (acute MI-unspecified including 4 cardiac arrests). Their ethnic categories were White British (n=18), Asian/ south Asian (n=7), African or Afro-Caribbean (n=3) and others (n=5) e.g. Turkish, Maltese etc. A number (n=6) declined to state their ethnicity or instead identified their religious affiliation e.g. "Church of England", "Jewish" etc. One interview was done via an informal family translator but frequently family members would participate in the interview, clarifying the order of events or reminding the participant about elements of their illness narrative (which may have been clouded by their illness including cardiac arrest or treatment such as strong opioid analgesics). Participants were usually approached to participate the day following admission or the Monday following a weekend admission and then interviewed usually the following day after consenting to participate as per our ethics approval. Each participant has been given a number between 1 to 43 and quotes are linked e.g. participant 22 (P22)

Table of participants (see table 1 - insert about here).

### Themes

The analysis of the data led to the identification of the following themes.

#### Symptoms

- Typical vs atypical presentations
  - Atypical presentations
- Absence of pain

#### Attribution and consequences

- Attributing symptoms to co-morbidities
  - Ascribing symptoms to DM
  - Ascribing symptoms to hypoglycaemia
- Delay in seeking help and gradual onset of symptoms
  - Multiple symptoms
- Lack of awareness of MI symptoms or their increased risk of MI
  - Experience of repeat MIs
- Language of pain
- Knowing something was wrong

However, these themes are not distinct. The nature of obtaining patients' narratives means that there are complex, inseparable relationships in concepts and ideas, with a continuum across themes and subthemes.

### Symptoms

#### Typical versus atypical presentations.

Chest pain of a specific character is regarded as the classic symptom of MI and was present in most of these interviews:

*"It was like your chest was being crushed." (P3)*

Many of these descriptions catch this essence of a typical MI

*"Err a real dull ache and like someone is screwing up, like a tight chest just really tight, like someone is squeezing it inside....yeah like a really, really dull pain"... "it started hurting and made me feel really ill ...but then I went really pale & started sweating .. absolutely saturated.. just a really tight chest and sore like, as if there was a weight directly on top of me". (P 11)*

Most of those in the study experienced some typical symptoms. However, typical symptoms with a recent chronology (necessary to suspect MI) was not always present or immediately apparent in the interviews.

Some experienced sweating; regarded as a typical MI symptom.

*"My night clothes were soaking wet." (P3).*

1  
2  
3 Breathlessness was also experienced either with pain or separately, which although  
4 classed as a “typical” symptom [23], is not generally recognised by clinicians to be  
5 suggestive of an MI.  
6  
7

8  
9 *“I can’t breathe, you couldn’t breathe, my wife she phone a medic ... No you*  
10 *got the pain and you can’t breathe...you think you’re gonna die for the lack of*  
11 *breath”, (P14)*  
12

13  
14 *“Like somebody’s pushing me...and I’m short of breath and then it was getting*  
15 *worse and it start burning”. (P35)*  
16  
17

### 18 Atypical pain

19  
20  
21 Some of those in this study sometimes narrated their experience of a diffuse and  
22 ambiguous set of symptoms that may not raise suspicion of MI.  
23

24  
25 *“It feels like something crawling up my arm... and it bites deep in there...the*  
26 *only way I can describe it, it feels like someone is in there with claws and*  
27 *they’re tearing at your inside. Just screaming and pulling at it. Very, very*  
28 *strange pain indeed”, (P24)*  
29  
30  
31

32  
33 although this person later describes quite typical sounding symptoms. Others  
34 described the quality of their pain.  
35

36  
37 *“It was just sticking pain, it was just a really pain, stay there for about 3*  
38 *hours”, (P30)*  
39

40  
41 *“Like a normal pain, it wasn’t a pain, actually it was dull”. (P26)*  
42

43  
44 These quotes raise the issue of participants’ use of language which is discussed  
45 later.  
46

47  
48 The following quote illustrates a mixture of some typical and atypical symptoms,  
49

50  
51 *“I can feel something happening you know, my chest, had very bad pain in my*  
52 *arm, my neck and my leg, I couldn’t move... Yeah sharp pain, very sharp*  
53 *...Somebody was pressing my, you know, chest...My back... All the way up to*  
54 *the waist...I couldn’t breathe you know. I get very deep breath, I tried to do it*  
55 *but it didn’t go, somebody was choking me”. (P5)*  
56  
57  
58  
59  
60

1  
2  
3 The inseparability of these two types of symptoms (typical/ atypical) is raised in the  
4 discussion.  
5

6  
7 Symptoms of weakness and tiredness were also reported around the timing of the  
8 MI. One participant could not walk and said:  
9

10  
11 *"It's just the sheer um lethargy really, I just couldn't do anything...I wasn't*  
12 *giddy and I wasn't in a lot of pain, I just couldn't sort of come too, I was, I*  
13 *couldn't put one foot in front of the other. I was just so weak". (P10)*  
14  
15

#### 16 17 Absence of pain

18  
19 Some clearly stated they had no chest pain;  
20

21  
22 *"Nothing, nothing, no discomfort, no pain" (pre cardiac arrest), (P27)*  
23

24 but this participant did have pain after being resuscitated. Another reported  
25

26  
27 *"No pain, no sweating, nothing else" (pre cardiac arrest). (P23)*  
28

29 Both of these participants experienced cardiac arrests, so some degree of event  
30 amnesia cannot be excluded.  
31

#### 32 33 Attribution and consequences

##### 34 35 Attributing symptoms to co-morbidities

36  
37 The participants seemed to rationalise their symptoms and find a reason to dismiss  
38 that the cause of their symptoms could be a "heart attack". Many attributed their  
39 symptoms to other illness and causes. Most commonly, they attributed their  
40 symptoms to indigestion, but the symptoms were attributed to other causes that  
41 included asthma, muscular aches, panic attacks, stress and importantly in this group,  
42 their DM.  
43  
44  
45  
46  
47

48  
49 *"Because of, I have other illness(es), like blood pressure, diabetes, I didn't think*  
50 *(of MI), because I thought there is nothing wrong with my heart." (P4).*  
51  
52

53 There were recurrent attributions by participants of chest pain to indigestion leading  
54 to self-medication with antacids for this.  
55  
56  
57  
58  
59  
60

1  
2  
3 *“when you feel bloated and gassy and it’s similar to that sort of pain. That’s*  
4 *why I mistook it for being indigestion.... I put it down to nerves or exercise*  
5 *...but then in the early hours of Sunday morning I realised it couldn’t have*  
6 *been indigestion because it was paining me a great deal”, (P31)*  
7  
8

9  
10 *“I took, bicarb of soda, didn’t work. I took um Gaviscon (antacid remedy),*  
11 *didn’t work. The antibiotics didn’t work. That’s when I knew, there was more to*  
12 *this”. (P3)*  
13  
14

15  
16 These quotes link to the theme of delay (both by patient and clinician in this  
17 instance) which is discussed further on.  
18  
19

### 20 Ascribing symptoms to DM

21

22 Participants sometimes attributed their symptoms to (lack) of control of their DM,  
23 symptoms of DM or side effects of their medication.  
24  
25

26  
27 *“I didn’t realise I was having heart attack, so I was feeling rotten ...I was*  
28 *hungry. Well I wasn’t really hungry but I know, don’t, diabetic, ...that’s when*  
29 *the pain come, and I went to bed and it woke me up around 2 in the morning”,*  
30 *(P17)*  
31  
32

33  
34 *“Well dizzy, tired, again I’m dizzy all the time with diabetes, you get that, that’s*  
35 *part and parcel of being diabetic”. (P17)*  
36  
37

38 Participant 3 also attributed her dizziness during her MI to her DM:  
39

40  
41 *“Not fainting, but you know dizzy turns, because I do get these dizzy turns.*  
42 *You see, this is all in with the diabetes you see”. (P3)*  
43  
44

### 45 Ascribing symptoms to hypoglycaemia

46

47 Patients when experiencing some symptoms, particularly sweating and feeling  
48 unwell perceived themselves to be experiencing hypoglycaemia, for example:  
49  
50

51  
52 *“because I am diabetic, right, um, I thought, initially I thought it was um low*  
53 *blood sugar”, (P2.)*  
54  
55

56 *“A little (of sweating) bit, but ...I didn’t have my testing gear with me & I*  
57 *thought that it might be a hypo at the time”. (P11)*  
58  
59  
60

Participant 3 perceived herself to be experiencing hypoglycaemia,

*"That's when I knew, there was more to this (symptoms) and I had, I don't know whether I had five hypo's in that week, but I was rolling all over the place". (P3).*

#### Delay in seeking help and gradual onset of symptoms

Delay in help seeking was a prominent feature in these narratives.

*"I think to be honest it (chest pain) came on suddenly but I tended to ignore it, I've got one more screw to put in", (P21)*

*"I waited till my GP opened in the morning. I called him and I told him what's wrong, they said 'just phone the ambulance' ". (P5).*

This delay could be ascribed to participants' pre-existing angina; but participants often realised that something more serious was occurring when their symptoms did not improve.

*"But it was there too long, so I said 'could be heart attack' ". (P30)*

However, for some participants part of this delay was the gradual rather than sudden onset of symptoms.

*"Well no ...it had happened a fortnight before"... "Sat in the chair for about 20mins and then it went so then I said to my wife, I told her 'If it happens again I would be calling the doctor' ". (P20)*

Often participants had dismissed or explained away these one off or minor symptoms and did not think much of them, except with hindsight.

*"more during the week. Nothing sharp... it was just a niggling thing, it just came and then it went away ... you just didn't think too much of any of these factors in isolation; but together". (P31)*

With others, denial was behind their delay,

*"Well I thought it was a heart attack but I didn't really want to admit it at the time. Anything other than a heart attack". (P17)*



### Multiple symptoms

The respondents often had complex narratives where chest pain was often a part of the symptom complex they describe, but their chest pain symptom may not have been the most prominent, important or distressing feature; which is exemplified by the following quote.

*"It (chest pain) did come on suddenly ...at the same time I had this very heavy perspiration...& this very uncomfortable tummy ache...Err all three things hitting me at once; you don't pick one out in particular ...all those three factors the er tummy ache the excessive err sweating and the pain in the chest um I could point to one and say look that was the main problem.. they were all a problem at that short period of time". (P 25)*

### Lack of awareness of MI symptoms or their increased risk of MI

Many of these respondents, despite having long standing diabetes, previous cardiac events or a strong family history, seemed unaware that they were at a high risk of subsequent MI.

*"My father had a heart attack, he died from it. My mother had a triple heart bypass. My elder brother's had an angioplasty, so it does run in the family."*  
(P2)

### Experiences of a repeat MI

Participants who had previous MIs might be expected to have a good working knowledge of these symptoms and respond accordingly if it recurred but did not necessarily do so.

*"I should have guessed, right, um, it's exactly the same symptoms as when I had my first heart attack". (P2)*

### Language of pain

The expectation of severe chest pain is key to many patients' and doctors' model of what an MI should be like and is apparent in some previous themes. However, many

1  
2  
3 of these respondents had symptoms that they didn't feel reached a threshold of  
4 severity that they would call "pain".  
5  
6

7 *"I suppose people would call it a pain, I don't know, I wouldn't, I would still call*  
8 *it severe discomfort...dull, rather than, no it wasn't sharp.... I won't put it (pain*  
9 *severity score) higher, otherwise I probably would have called an ambulance*  
10 *straight away", (P20)*  
11

12  
13  
14 *"No, it was a constant. When I say pain, ache, it wasn't a pain that was*  
15 *making me double up or anything". (P25)*  
16  
17

18 While some struggled to conceptualise their symptoms as pain, others struggled to  
19 use words to describe their symptoms  
20  
21

22  
23 *"It's so difficult cos it was more uncomfortable than a pain that you can*  
24 *describe ... I don't know how to describe it". (P20)*  
25  
26

27 While others clearly had very significant pain but still struggled to articulate it.  
28

29 *"Indescribable to me, I couldn't, as I sit here I can't describe it... I had severe*  
30 *pain and it was; I don't know how you break it down into words". (P19)*  
31  
32

### 33 Knowing something is "wrong"

34

35  
36 Frequently participants had a "gut feeling" that there was something wrong or a  
37 strong emotional response to their symptoms.  
38  
39

40 *"You know, I could sort of feel that there was something wrong", (P2).*  
41

42 *"And I thought I can't do this, I got to get 'elp, and that's when I dialled 999...*  
43 *and, you know, everything was going wrong, and I just couldn't figure out".*  
44 *(P3).*  
45  
46  
47

48 A "sense of doom" is often associated with the presentation of MI, but in this group  
49 only one participant reported a strong sense of impending death.  
50  
51

52 *"I felt as if I was going to die (anxious voice)". (P6)*  
53  
54  
55  
56  
57  
58  
59  
60

## Discussion

We found that patients with DM who experienced an MI exhibited a wide range of symptoms from very classical presentations to very mild symptoms. Patients often were unclear what caused their symptoms. This diagnostic confusion or uncertainty appears periodically to have been mirrored by clinicians.

The symptoms experienced in this group ranged from those that may be expected by health care professionals, to more atypical symptoms with patients using unusual descriptive terms. The variation in experiences highlights the difficulty for both patients and healthcare providers to correctly attribute these symptoms to a cardiac event.

Patients with DM will often have other significant co-morbidities which can be attributed to their symptoms e.g. breathlessness from chronic obstructive pulmonary disease (COPD) rather than an MI. However, there seems to be an important area of confusion from symptoms related to DM and its control, that can lead to a misattribution of pain symptoms away from a new onset MI. A specific issue among this group is the impact of MI symptoms which were perceived as a side effect of medication (particularly insulin and oral hypoglycaemics). Interpreting episodes of hypoglycaemia and sudden onset MI seems to be particularly challenging with an overlap of many similar symptoms and their sudden onset.

We found a lack of knowledge of MI symptoms, being falsely reassured by lack of severe pain or not conceptualising milder chest discomfort as chest pain. These factors may all lead to denial or confusion and therefore delay in seeking care.<sup>28</sup> Delay in seeking medical attention during an MI, will have significant prognostic implications.

As the participants' symptoms did not fit with their preconceived ideas of an MI, they ascribed it to other less serious causes, or importantly attributed their symptoms to their DM, medication side effects or "hypos"; which is a novel and important finding. The attenuated chest pain competing with other, perhaps more distressing symptoms and so being "crowded out" from the illness cognition of a possible MI, has not been previously reported.

### Strengths

Within this study we have reported contemporaneous symptoms from a well described patient group, who can be characterised by their MI diagnosis. We have captured a wide range of participants with MI, by using biochemical confirmation of diagnosis wherever possible, but also by including clinical diagnoses (e.g. for cardiac arrests). Unusually for a qualitative study we have a relatively large number of participants, who were interviewed as early as possible (or allowed to) after the event to reduce recall bias.<sup>29</sup>

### Limitations

Despite recruiting participants on the basis of their MI diagnosis, but not specifically on chest pain presentations, participants are likely to have initially volunteered chest pain symptoms to get admitted to a coronary care unit. Markedly discrepant MI narratives are less likely to be represented in this study, as are silent MIs, as they are more likely to go unrecognised and present late. Survivor bias is also a distinct possibility. While a study size of 40 is good for qualitative research,<sup>29</sup> it is small in comparison with epidemiological studies so this methodology is therefore unlikely to pick up rarer presentations of MI.

Recruiting on the basis of being able to converse in English will exclude the linguistic nuance of other languages and cultures; important when south Asian populations among others, have a high risk of DM and coronary heart disease. However, we did successfully capture many patients who had English as second language. Additionally the UK NHS struggles to provide reliable, accessible translation; particularly in the acute and out of hours setting, so our findings may more faithfully reflect the real world setting of these decisions and presentations.

Truncating these interviews into quotes also runs the danger of falsely dichotomising symptoms into “typical” and “atypical”. When the transcripts are read in full and in context, a more rounded picture of the event develops. This nuanced view is

1  
2  
3 probably a key element that helps experienced clinicians successfully identify a  
4 potential MI, in this group of patients.  
5  
6  
7  
8

9  
10 How this fits into existing literature  
11

12 The findings of our study link with previous work within a broad context of  
13 psychological models of illness behaviour such as the health belief model.<sup>30</sup>  
14 Theoretical models of delay in seeking treatment specifically in relation to MI have  
15 been summarised by Dracup.<sup>28</sup> Other studies highlight the considerable  
16 psychological impact of pain and specifically cardiac pain<sup>31</sup>, where cardiac  
17 symptoms can be interpreted as pain, but also can trigger symptoms such as anxiety  
18 and responses like uncertainty<sup>32</sup> leading to denial and fear.<sup>33</sup> The response of  
19 denial is well recognised in other studies, particularly among men, where the impact  
20 of their gender roles can adversely affect their health seeking behaviour.<sup>34</sup> Many of  
21 our participants did not perceive themselves to be at risk of a heart attack. The  
22 perceived lack of vulnerability to heart disease links to the concept of “lay  
23 epidemiology” and of “coronary candidacy” i.e. not fitting assumptions about the sort  
24 of person who gets a heart attack.<sup>35</sup>  
25  
26  
27  
28  
29  
30  
31  
32  
33

34 The language of describing pain and particularly the difficulty of describing pain  
35 recurs within our sample. Scarry describes this as the “inexpressibility of pain”<sup>36</sup> and  
36 this is seen with some respondents. Others use metaphor and simile to circumvent  
37 this issue, which may be helpful to the patient but means a clinician might cognitively  
38 process such symptom descriptions as “atypical” or “non cardiac”, leading to delays  
39 in treatment. The term “chest pain” is also problematic<sup>18</sup>; many of these participants  
40 did not conceptualise their chest symptoms as pain and so, Miller has suggested  
41 using the term “chest sensation” instead.<sup>37</sup>  
42  
43  
44  
45  
46  
47

48 We have used our findings to adapt Rosenstock and Kirsch’s health belief model  
49 (see figure 1) so that the impact of DM can modify the steps in the model such as  
50 reduced pain from neuropathy during an MI reducing the likelihood of action.  
51  
52  
53  
54  
55

56  
57 Diagram here (figure 1)  
58  
59  
60

1  
2  
3  
4  
5  
6  
7  
8  
9  
10  
11  
12  
13  
14  
15  
16  
17  
18  
19  
20  
21  
22  
23  
24  
25  
26  
27  
28  
29  
30  
31  
32  
33  
34  
35  
36  
37  
38  
39  
40  
41  
42  
43  
44  
45  
46  
47  
48  
49  
50  
51  
52  
53  
54  
55  
56  
57  
58  
59  
60

Our findings have some similarities to other studies about patients' experiences of MI.<sup>23 38 39 40</sup> The similarity of symptom presentation raises the possibility that these studies are just capturing the heterogeneous array of MI symptoms and this is unlinked to any underlying physiological or pathological process such as gender or DM. However, our finding of patient misattribution of MI symptoms to DM and diabetic medication, in a group at high risk of MI, does have significant clinical implications for patients and clinicians.

### Implications for further research

Despite knowing that people with DM are at much higher risk of coronary events we fail to inform patients in the UK about their increased cardio vascular risk nor identify early those who may be developing such problems. Whether screening diabetics for ischaemic heart disease would be beneficial remains a key question. Possibilities include trialling patient education about their CHD risk and its presentation in the UK Quality and Outcome (QOF) DM check or including this information within DESMOND ([desmond-project.org.uk](http://desmond-project.org.uk))/DAFNE ([www.dafne.uk.com](http://www.dafne.uk.com)) patient education programmes, but there would be considerable difficulty in designing an educational package that could reliably help patients distinguish between these two aetiological possibilities of "hypo" versus MI.

### Implications for practice

This study could contribute towards increased awareness of MI in those with DM. Clinicians should carefully explore patients' symptoms as well as their interpretation of their symptoms. Patients with DM should be made aware of their increased risk of cardiac events, how they present and how they differ from medication side effects and "hypos".

#### a. Contributorship statement

All 3 authors fulfil all three of the ICMJE guidelines for authorship, MJ had the original study conception and design and then supervised NT during her iBSc project. NT collected all the data. NT and DDC analysed the final data set. MJ wrote the final manuscript with substantial intellectual input from NT and DDC. All authors approved the final manuscript.

b. Competing interests

None

c. Funding

Royal College of General Practitioners' Scientific foundation board (grant SFB 2011-25)

d. Data sharing statement

No additional data are available as participants only consented to quotes being published.

## Reference List

1. González ELM, Johansson S, Wallander MA, et al. Trends in the prevalence and incidence of diabetes in the UK: 1996 to 2005. *Journal of Epidemiology and Community Health* 2009;**63**(4):332-36.
2. Wannamethee SG, Shaper AG, Lennon L. Cardiovascular disease incidence and mortality in older men with diabetes and in men with coronary heart disease. *Heart* 2004;**90**(12):1398-403.
3. Shah AD, Langenberg C, Rapsomaniki E, et al. Type 2 diabetes and incidence of cardiovascular diseases: a cohort study in 1.9 million people. *The Lancet Diabetes & Endocrinology* 2015;**3**(2):105-13.
4. Collaboration TERF. Diabetes Mellitus, Fasting Glucose, and Risk of Cause-Specific Death. *New England Journal of Medicine* 2011;**364**(9):829-41.
5. Huxley R, Barzi F, Woodward M. Excess risk of fatal coronary heart disease associated with diabetes in men and women: meta-analysis of 37 prospective cohort studies. *BMJ* 2006;**332**(7533):73-78.
6. Stamler J, Vaccaro O, Neaton JD, et al. Diabetes, other risk factors, and 12-yr cardiovascular mortality for men screened in the Multiple Risk Factor Intervention Trial. *Diabetes Care* 1993;**16**(2):434-44.
7. Haffner SM, Lehto S, Ronnema T, et al. Mortality from Coronary Heart Disease in Subjects with Type 2 Diabetes and in Nondiabetic Subjects with and without Prior Myocardial Infarction. *The New England Journal of Medicine* 1998;**339**(4):229-34.
8. Brophy S, Cooksey R, Gravenor M, et al. Population based absolute and relative survival to 1 year of people with diabetes following a myocardial infarction: A cohort study using hospital admissions data. *BMC Public Health* 2010;**10**(1):338.
9. Canto JG, Shlipak MG, Rogers WJ, Malmgren JA, Frederick PD, Lambrew CT, Ornato JP, Barron HV, Kiefe C. Prevalence, clinical characteristics, and mortality among patients with myocardial infarction presenting without chest pain. *JAMA* 2000;**283**(24):3223-29.
10. Brieger D, Eagle KA, Goodman SG, et al. Acute Coronary Syndromes Without Chest Pain, An Underdiagnosed and Undertreated High-Risk Group: Insights From The Global Registry of Acute Coronary Events. *Chest* 2004;**126**(2):461-69.
11. Arslanian-Engoren C, Patel A, Fang J, et al. Symptoms of Men and Women Presenting With Acute Coronary Syndromes. *The American Journal of Cardiology* 2006;**98**(9):1177-81.
12. Funk M, Naum JB, Milner KA, et al. Presentation and symptom predictors of coronary heart disease in patients with and without diabetes. *AmJ EmergMed* 2001;**19**(6):482-87.

13. Kentsch M RU, Gitt AK, Schiele R, Wienbergen H, Schubert J, Muller-Esch G, Ittel TH, Mitusch R, Tschoepe D, Senges J. Angina intensity is not different in diabetic and non-diabetic patients with acute myocardial infarction. *Zeitschrift fur Kardiologie* 2003;**92**(10):817-24.
14. Stephen SA, Darney BG, Rosenfeld AG. Symptoms of acute coronary syndrome in women with diabetes: An integrative review of the literature. *Heart & Lung: The Journal of Acute and Critical Care* 2005;**37**(3):179-89.
15. DeVon HA, Penckofer SM, Zerwic JJ. Symptoms of unstable angina in patients with and without diabetes. *ResNursHealth* 2005;**28**(2):136-43.
16. Richman PB, Brogan GX, Nashed AN, et al. Clinical Characteristics of Diabetic vs Nondiabetic Patients Who "Rule-in" for Acute Myocardial Infarction. *Academic Emergency Medicine* 1999;**6**(7):719-23.
17. Airaksinen KE, Koistinen MJ. Association between silent coronary artery disease, diabetes, and autonomic neuropathy. Fact of fallacy? *Diabetes Care* 1992;**15**(2):288-92.
18. Treasure T. Pain is not the only feature of heart attack. *BMJ* 1998;**317**:602.
19. Albarran JW, Clarke BA, Crawford J. 'It was not chest pain really, I can't explain it!' An exploratory study on the nature of symptoms experienced by women during their myocardial infarction. *J Clin Nurs* 2007;**16**(7):1292-301.
20. Maser RE, Mitchell BD, Vinik AI, et al. The Association Between Cardiovascular Autonomic Neuropathy and Mortality in Individuals With Diabetes. *Diabetes Care* 2003;**26**(6):1895-901.
21. Mayer DD, Rosenfeld A. Symptom Interpretation in Women With Diabetes and Myocardial Infarction: A Qualitative Study. *The Diabetes Educator* 2006;**32**(6):918-24.
22. Farmer SA, Higginson IJ. Chest Pain: Physician Perceptions and Decision making in a London Emergency Department. *Annals of Emergency Medicine* 2006;**48**(1):77-85.
23. Lichtman JH, Leifheit-Limson EC, Watanabe E, et al. Symptom Recognition and Healthcare Experiences of Young Women With Acute Myocardial Infarction. *Circulation: Cardiovascular Quality and Outcomes* 2015;**8**(2 suppl 1):S31-S38.
24. Thygesen K, Alpert JS, White HD, et al. Universal Definition of Myocardial Infarction. *Circulation* 2007;**116**(22):2634-53.
25. Kleinman A. *The illness narratives: Suffering, healing, and the human condition*: Basic books, 1988.
26. Ritchie J, Spencer L. Qualitative data analysis for applied policy research. *The qualitative researcher's companion* 2002;**573**:305-29.
27. Diamond GA, Forrester JS. Analysis of probability as an aid in the clinical diagnosis of coronary-artery disease. *N Engl J Med* 1979;**300**(24):1350-58.
28. Dracup K, Moser DK, Eisenberg M, et al. Causes of delay in seeking treatment for heart attack symptoms. *Social Science & Medicine* 1995;**40**(3):379-92.
29. Baker SE, Edwards R. How many qualitative interviews is enough. 2012.
30. Strecher VJ, Rosenstock IM. The health belief model. *Cambridge handbook of psychology, health and medicine* 1997:113-17.
31. MacDermott AF. Living with angina pectoris--a phenomenological study. *Eur J CardiovascNurs* 2002;**1**(4):265-72.
32. Fitzsimons D, Parahoo K, Richardson SG, et al. Patient anxiety while on a waiting list for coronary artery bypass surgery: a qualitative and quantitative analysis. *Heart Lung* 2003;**32**(1):23-31.
33. Tod AM, Read C, Lacey A, et al. Barriers to uptake of services for coronary heart disease: qualitative study. *BMJ* 2001;**323**(7306):214.
34. White AK, Johnson M. Men making sense of their chest pain--niggles, doubts and denials. *J Clin Nurs* 2000;**9**(4):534-41.
35. Emslie C, Hunt K, G W. "I'd rather go with a heart attack than drag on": lay images of heart disease and the problems they present for primary and secondary prevention. *Coronary Health Care* 2001;**5**:25-32.



- 1
- 2
- 3 36. Scary E. *The body in pain*. New York: Oxford University Press, 1985.
- 4 37. Miller CL. Symptom reflections of women with cardiac disease and advanced practice nurses: a
- 5 descriptive study. *ProgCardiovascNurs* 2003;**18**(2):69-76.
- 6 38. Coventry LL, van Schalkwyk JW, Thompson P, et al. Myocardial infarction, patient decision delay
- 7 and help seeking behaviour: a thematic analysis. *Journal of Clinical Nursing* 2016:n/a-n/a.
- 8 39. Ängerud KH, Brulin C, Eliasson M, et al. The Process of Care-seeking for Myocardial Infarction
- 9 Among Patients With Diabetes. *The Journal of Cardiovascular Nursing* 2015;**30**(5):E1-E8.
- 10 40. DeVon HA, Hogan N, Ochs AL, et al. Time to Treatment for Acute Coronary Syndromes: The Cost
- 11 of Indecision. *Journal of Cardiovascular Nursing* 2010;**25**(2):106-14.
- 12
- 13
- 14
- 15
- 16
- 17
- 18
- 19
- 20
- 21
- 22
- 23
- 24
- 25
- 26
- 27
- 28
- 29
- 30
- 31
- 32
- 33
- 34
- 35
- 36
- 37
- 38
- 39
- 40
- 41
- 42
- 43
- 44
- 45
- 46
- 47
- 48
- 49
- 50
- 51
- 52
- 53
- 54
- 55
- 56
- 57
- 58
- 59
- 60

1  
2  
3  
4  
5  
6  
7  
8  
9  
10  
11  
12  
13  
14  
15  
16  
17  
18  
19  
20  
21  
22  
23  
24  
25  
26  
27  
28  
29  
30  
31  
32  
33  
34  
35  
36  
37  
38  
39  
40  
41  
42  
43  
44  
45  
46  
47  
48  
49  
50  
51  
52  
53  
54  
55  
56  
57  
58  
59  
60

Figure 1: How diabetes (grey boxes) might affect the "Health Belief model" during MI  
 With permission from Fig 1, page 115 (adapted) from Victor J. Strecher and Irwin M. Rosenstock, "The health belief model", Andrew Baum, Stanton Newman, John Weinmar, Robert West, Chris McManus (eds.), (1997), "Cambridge Handbook of Psychology, Health and Medicine, 9780521436861, Cambridge : Cambridge University

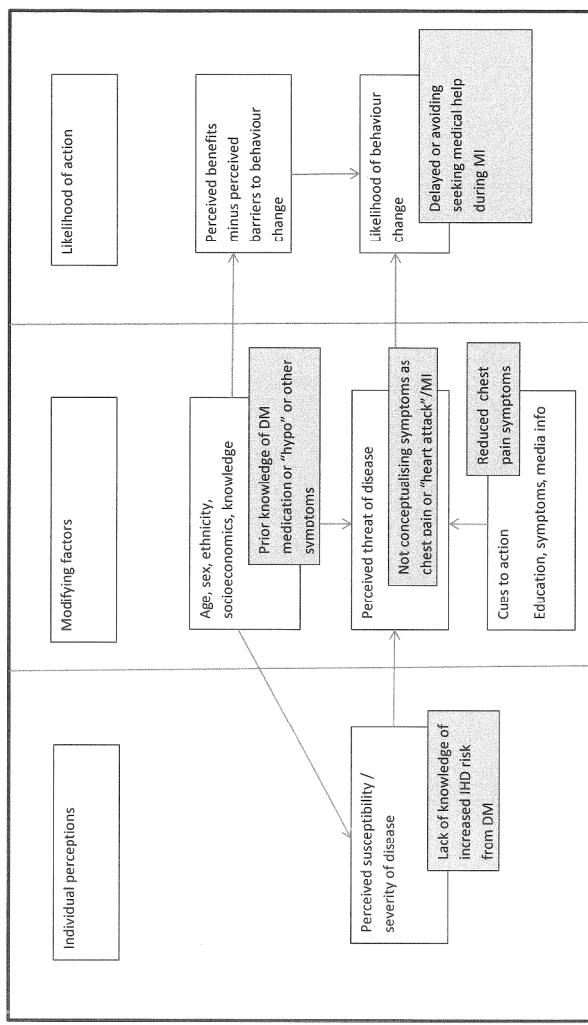

Caption : How diabetes (grey boxes) might affect the "Health Belief model" during MI

296x419mm (300 x 300 DPI)

1  
2  
3  
4  
5  
6  
7  
8  
9  
10  
11  
12  
13  
14  
15  
16  
17  
18  
19  
20  
21  
22  
23  
24  
25  
26  
27  
28  
29  
30  
31  
32  
33  
34  
35  
36  
37  
38  
39  
40  
41  
42  
43  
44  
45  
46  
47  
48  
49

Consolidated criteria for reporting qualitative studies (COREQ): 32-item checklist

| No                                             | Item                                     | Guide questions/description                                                                                                                      | Author completed                                                                       |
|------------------------------------------------|------------------------------------------|--------------------------------------------------------------------------------------------------------------------------------------------------|----------------------------------------------------------------------------------------|
| <b>Domain 1: Research team and reflexivity</b> |                                          |                                                                                                                                                  |                                                                                        |
|                                                | Personal Characteristics                 |                                                                                                                                                  |                                                                                        |
| 1.                                             | Interviewer/facilitator                  | Which author/s conducted the interview or focus group?                                                                                           | NK                                                                                     |
| 2.                                             | Credentials                              | What were the researcher's credentials? <i>E.g. PhD, MD</i>                                                                                      | MD MSc (MH) undergraduate (NK), BSc (DDC)                                              |
| 3.                                             | Occupation                               | What was their occupation at the time of the study?                                                                                              | Sen Lect (MJ), MB BS / iBSc student (NK), student/junior doc (DDC)                     |
| 4.                                             | Gender                                   | Was the researcher male or female?                                                                                                               | Both genders                                                                           |
| 5.                                             | Experience and training                  | What experience or training did the researcher have?                                                                                             | MJ extensive research and research supervision, NK / DDC developed expertise dug study |
| Relationship with participants                 |                                          |                                                                                                                                                  |                                                                                        |
| 6.                                             | Relationship established                 | Was a relationship established prior to study commencement?                                                                                      | no                                                                                     |
| 7.                                             | Participant knowledge of the interviewer | What did the participants know about the researcher? <i>e.g. personal goals, reasons for doing the research</i>                                  | Information as set out in pt info leaflet as agreed by IRC/ ethics committee           |
| 8.                                             | Interviewer characteristics              | What characteristics were reported about the interviewer/facilitator? <i>e.g. Bias, assumptions, reasons and interests in the research topic</i> | NK identified as medical student, MJ as academic and clinician                         |
| <b>Domain 2: study design</b>                  |                                          |                                                                                                                                                  |                                                                                        |
| Theoretical framework                          |                                          |                                                                                                                                                  |                                                                                        |

| No  | Item                                  | Guide questions/description                                                                                                                                     | Author completed                                                                                                                      |
|-----|---------------------------------------|-----------------------------------------------------------------------------------------------------------------------------------------------------------------|---------------------------------------------------------------------------------------------------------------------------------------|
| 9.  | Methodological orientation and Theory | What methodological orientation was stated to underpin the study? <i>e.g. grounded theory, discourse analysis, ethnography, phenomenology, content analysis</i> | Thematic analysis (Ritchie and Spencer)                                                                                               |
|     | Participant selection                 |                                                                                                                                                                 |                                                                                                                                       |
| 10. | Sampling                              | How were participants selected? <i>e.g. purposive, convenience, consecutive, snowball</i>                                                                       | convenience                                                                                                                           |
| 11. | Method of approach                    | How were participants approached? <i>e.g. face-to-face, telephone, mail, email</i>                                                                              | Prior selection by clinical team (to establish well enough to participate), approach with PIS by researcher, and "cooling off" period |
| 12. | Sample size                           | How many participants were in the study?                                                                                                                        | 43                                                                                                                                    |
| 13. | Non-participation                     | How many people refused to participate or dropped out? Reasons?                                                                                                 |                                                                                                                                       |
|     | Setting                               |                                                                                                                                                                 |                                                                                                                                       |
| 14. | Setting of data collection            | Where was the data collected? <i>e.g. home, clinic, workplace</i>                                                                                               | On hospital ward (including coronary care unit)                                                                                       |
| 15. | Presence of non-participants          | Was anyone else present besides the participants and researchers?                                                                                               | Occasionally patient relatives stayed during the interview.                                                                           |
| 16. | Description of sample                 | What are the important characteristics of the sample? <i>e.g. demographic data, date</i>                                                                        | Recorded in table 1 of manuscript                                                                                                     |
|     | Data collection                       |                                                                                                                                                                 |                                                                                                                                       |
| 17. | Interview guide                       | Were questions, prompts, guides provided by the authors? Was it pilot tested?                                                                                   | Yes                                                                                                                                   |
| 18. | Repeat interviews                     | Were repeat interviews carried out? If yes, how many?                                                                                                           | No                                                                                                                                    |
| 19. | Audio/visual recording                | Did the research use audio or visual recording to collect the data?                                                                                             | Audio-recorded                                                                                                                        |
| 20. | Field notes                           | Were field notes made during and/or after the interview or focus group?                                                                                         | Yes                                                                                                                                   |
| 21. | Duration                              | What was the duration of the interviews or focus group?                                                                                                         | 5-48 minutes                                                                                                                          |

| No                                      | Item                           | Guide questions/description                                                                                                                 | Author completed                                                  |
|-----------------------------------------|--------------------------------|---------------------------------------------------------------------------------------------------------------------------------------------|-------------------------------------------------------------------|
| 22.                                     | Data saturation                | Was data saturation discussed?                                                                                                              | Yes                                                               |
| 23.                                     | Transcripts returned           | Were transcripts returned to participants for comment and/or correction?                                                                    | No as no identifiable data was removed from the ward              |
| <b>Domain 3: analysis and findingsz</b> |                                |                                                                                                                                             |                                                                   |
| Data analysis                           |                                |                                                                                                                                             |                                                                   |
| 24.                                     | Number of data coders          | How many data coders coded the data?                                                                                                        | 2                                                                 |
| 25.                                     | Description of the coding tree | Did authors provide a description of the coding tree?                                                                                       | Thematic analysis was recorded as an excel spreadsheet not a tree |
| 26.                                     | Derivation of themes           | Were themes identified in advance or derived from the data?                                                                                 | Data derived                                                      |
| 27.                                     | Software                       | What software, if applicable, was used to manage the data?                                                                                  | Spreadsheet and word processing software                          |
| 28.                                     | Participant checking           | Did participants provide feedback on the findings?                                                                                          | No (see previous comments)                                        |
| Reporting                               |                                |                                                                                                                                             |                                                                   |
| 29.                                     | Quotations presented           | Were participant quotations presented to illustrate the themes / findings?<br>Was each quotation identified? e.g. <i>participant number</i> | Yes identified by participant number.                             |
| 30.                                     | Data and findings consistent   | Was there consistency between the data presented and the findings?                                                                          | Yes                                                               |
| 31.                                     | Clarity of major themes        | Were major themes clearly presented in the findings?                                                                                        | Yes                                                               |
| 32.                                     | Clarity of minor themes        | Is there a description of diverse cases or discussion of minor themes?                                                                      | Yes                                                               |

# BMJ Open

## "Just like a normal pain"- experiences of people with diabetes mellitus recruited from hospitals after having a myocardial infarction - a qualitative study

|                                 |                                                                                                                                                                                                                                                                                                                                                                                    |
|---------------------------------|------------------------------------------------------------------------------------------------------------------------------------------------------------------------------------------------------------------------------------------------------------------------------------------------------------------------------------------------------------------------------------|
| Journal:                        | <i>BMJ Open</i>                                                                                                                                                                                                                                                                                                                                                                    |
| Manuscript ID                   | bmjopen-2016-015736.R1                                                                                                                                                                                                                                                                                                                                                             |
| Article Type:                   | Research                                                                                                                                                                                                                                                                                                                                                                           |
| Date Submitted by the Author:   | 03-Apr-2017                                                                                                                                                                                                                                                                                                                                                                        |
| Complete List of Authors:       | Berman, Nikita; UCL, Research Department of Primary Care and Population Health; Plymouth Hospitals NHS Trust<br>Jones, Melvyn; UCL, Research Department of Primary Care and Population Health; Warden Lodge Surgery,<br>De Coster, Daan; Princess Royal University Hospital, King's College NHS Trust, Bromley, UK; UCL, Research Department of Primary Care and Population Health |
| <b>Primary Subject Heading</b>: | Cardiovascular medicine                                                                                                                                                                                                                                                                                                                                                            |
| Secondary Subject Heading:      | Diabetes and endocrinology, Qualitative research, Emergency medicine, General practice / Family practice                                                                                                                                                                                                                                                                           |
| Keywords:                       | Chest pain, Myocardial infarction < CARDIOLOGY, Diabetic nephropathy & vascular disease < DIABETES & ENDOCRINOLOGY                                                                                                                                                                                                                                                                 |
|                                 |                                                                                                                                                                                                                                                                                                                                                                                    |

SCHOLARONE™  
Manuscripts

Only

1  
2  
3  
4  
5  
6  
7  
8 **“Just like a normal pain”- experiences of people**  
9 **with diabetes mellitus recruited from hospitals after**  
10 **having a myocardial infarction - a qualitative study.**  
11  
12  
13  
14  
15  
16  
17  
18  
19  
20  
21  
22  
23  
24  
25  
26  
27

28 Dr Nikita Berman (1) (2), Dr Melvyn M Jones (1), Dr Daan A De Coster (3)  
29  
30  
31  
32

33 Corresponding author: Dr Melvyn Jones ORCID ID 0000-0002-8766-7443  
34 Email: [melvyn.jones@ucl.ac.uk](mailto:melvyn.jones@ucl.ac.uk)  
35  
36  
37

- 38 1. Research Department of Primary Care and Population Health  
39 UCL Medical School, London, UK.  
40
- 41 2. Plymouth Hospitals NHS Trust  
42 Derriford Road, Crownhill, Plymouth, Devon, PL6 8DH, UK  
43  
44
- 45 3. Princess Royal University Hospital Bromley, King's College NHS Trust, UK  
46  
47  
48  
49  
50  
51  
52  
53  
54  
55  
56  
57  
58  
59  
60

## Abstract

**Objective:** The objective of the study was to investigate the symptoms people with diabetes experience when having a myocardial infarction (MI), their illness narrative, and how they present their symptoms to the health service.

**Setting:** Three London (United Kingdom) hospitals- Coronary care units (CCU) and medical wards.

**Participants:** Patients were recruited with diabetes mellitus (DM) (Type 1 & 2) with a clinical presentation of MI (ST elevated myocardial infarction [STEMI], non ST elevated myocardial infarction [NSTEMI], acute MI unspecified & cardiac arrest). 43 participants were recruited, 39 interviews met the study criteria and were analysed. They were predominantly male (n=30), aged 40-90 years and white British (18/39), just over a half were from other ethnic groups. The majority had type II DM (n=35); 24 had an NSTEMI, 10 had an STEMI and 5 had other cardiac events.

**Definitions of selection / exclusion criteria:** a diagnosis of MI, and DM, the ability to communicate enough English to complete the interview. Ward staff made a clinical judgement that the participant was post-treatment, clinically stable and well enough to participate.

**Methods:** A qualitative study utilising taped and transcribed interviews analysed using a thematic analysis.

**Results:** While most participants did experience chest pain, it was often not their most striking symptom. As their chest pain did not match their expectations of what a "heart attack" should be, participants developed narratives to explain these symptoms, including the symptoms being effects of their DM ("hypos"), side effects of medication (oral hypoglycaemics) or symptoms (such as breathlessness and indigestion) related to other comorbidities; often leading to delays in seeking care.

### **Conclusions:**

While truly absent chest pain during MI among people with DM was rare in this study, patients' attenuated symptoms often led to delay in seeking attention, and this may result in delays in receiving treatment.



1  
2  
3 **Data sharing:** - No additional data available.  
4  
5

6 **Article summary**  
7

8 Strengths and weaknesses  
9

10  
11 This is a study of people with diabetes experiencing an MI.  
12

13 Strengths of the study include:  
14

- 15 • contemporaneous patients' descriptions of their symptoms and illness  
16 narrative just after an MI,  
17
- 18 • a model of how attenuated MI symptoms might alter help seeking behaviour,  
19
- 20 • the participants were from a wide demographic background in terms of age,  
21 ethnicity and disease burden.  
22

23  
24 Weaknesses include:  
25

- 26 • by recruiting patients from coronary care units we will not have captured  
27 markedly discrepant presentations,  
28
- 29 • by recruiting on the basis of the ability to communicate in English we will have  
30 lost some cultural and linguistic nuance in symptom presentation.  
31  
32  
33  
34  
35  
36  
37  
38  
39  
40  
41  
42  
43  
44  
45  
46  
47  
48  
49  
50  
51  
52  
53  
54  
55  
56  
57  
58  
59  
60

## Background

Diabetes Mellitus (DM) is a common health problem worldwide and affects 4-6% of the UK population.<sup>1</sup> Cardiovascular disease (CVD) is the major life threatening complication of DM in the UK.<sup>2 3 4</sup> Myocardial infarction (MI) is the prime cause of excess mortality among those with DM, with a 3-fold increased risk of coronary heart disease (CHD) mortality,<sup>5 6</sup> a 6-fold increased risk of myocardial infarction (MI)<sup>7</sup> and a worse prognosis from MI compared with populations without diabetes.<sup>8</sup>

Possible mechanisms of this excess mortality risk include comorbidities such as hypertension, dyslipidaemia and chronic kidney disease. An important element in this observed increased mortality may be late or missed presentation by patients, and diagnosis by clinicians.<sup>9 10 11</sup>

Up to a third of people who suffer an MI can have no chest pain; however people with DM make up a larger proportion of this group (32.6% vs 25.4% in one study).<sup>12</sup> However, when people with DM do have symptoms of an MI, their symptoms may often be atypical<sup>13</sup> or unusual.<sup>14</sup> Nevertheless, there is conflicting evidence around this issue: Funk found no statistically significant difference in CHD symptom presentation in people with and without DM, but did report non-significant increases in dyspnoea, neck and throat pain among those with DM.<sup>15</sup> Kentsch found no differences between these groups in the frequency or severity of chest pain but also identified differences in the prevalence of dyspnoea.<sup>16</sup> One review found conflicting results about differing MI symptoms among women with and without DM.<sup>17</sup>

There are several methodological reasons why these studies may have conflicting results: being underpowered,<sup>18 19</sup> being unrepresentative of the population at risk,<sup>18</sup> or recruited from highly selected hospital populations.<sup>20</sup> Survivor bias (i.e. living to tell the tale of your symptoms) may also be an important issue in a condition such as MI which has a high early mortality.<sup>21</sup>

There is a biological basis for altered perception of pain among people with diabetes in that cardiac autonomic neuropathy (CAN) is a complication of DM and leads to

1  
2  
3 altered pain perception, meaning a patient might not experience pain caused by  
4 myocardial ischaemia.<sup>20</sup>  
5  
6

7 Several qualitative studies have explored patients' symptoms during MI.<sup>22 23 24 25 26</sup>

8  
9 <sup>18</sup> Within the general population experiencing MI, there are several issues identified  
10 including; the considerable psychological impact of pain and specifically cardiac  
11 pain,<sup>27</sup> cardiac symptoms that can be interpreted as pain, but also can trigger  
12 symptoms such as anxiety (both as a trigger and barrier to action) and fear,<sup>28</sup>  
13 producing responses like uncertainty,<sup>29</sup> and denial.<sup>30</sup> Further factors identified  
14 include patients not recognising their symptoms as MI, experiencing vague  
15 symptoms,<sup>31</sup> misattributing their symptoms,<sup>23 24</sup> erroneous expectations of an MI,  
16 <sup>31</sup> and the decisions patients make during their MI.<sup>32</sup> Other factors include delays in  
17 seeking care.<sup>30 11</sup> Theoretical models of delay in seeking treatment specifically in  
18 relation to MI have been summarised by Dracup.<sup>33</sup> Underestimating personal risk of  
19 an MI,<sup>23</sup> and perceived lack of vulnerability to heart disease link to the concept of  
20 "lay epidemiology" and of "coronary candidacy" i.e. not fitting assumptions about the  
21 sort of person who gets a heart attack.<sup>34</sup>  
22  
23  
24  
25  
26  
27  
28  
29  
30

31 There is a role of gender with MI symptoms and its interpretation; work exploring  
32 women's experience of MI symptoms found that women with diabetes had more  
33 atypical and painless MIs than men.<sup>35</sup> In studies of denial among men, there has  
34 been exploration of the impact of their gender roles adversely effecting health  
35 seeking behaviour.<sup>36</sup>  
36  
37  
38  
39

40 In studies specifically exploring the experience of patient with diabetes and MI, many  
41 similar themes emerge. However Angerud finds a variability in the experience of MI  
42 symptoms while exploring the patients' response to symptoms, perceived  
43 susceptibility, and symptom interpretation (but found that MI symptoms were rarely  
44 ascribed to DM).<sup>25</sup> Other studies in this population also identify breathlessness as a  
45 presenting symptom, misinterpretation of symptoms; and their diabetes influencing  
46 patients' decision making during events.<sup>37</sup>  
47  
48  
49  
50  
51

52  
53 Clinician factors  
54  
55  
56  
57  
58  
59  
60

1  
2  
3 The way clinicians ask about chest symptoms may be problematic. Clinicians ask  
4 about “chest pain”, however the term “pain”,<sup>38 39</sup> is often not used by patients  
5 experiencing MI.  
6  
7

8  
9 In the current study, we aimed to address some of the limitations of previous  
10 research by recruiting only DM patients with clear evidence of a recent MI,  
11 regardless of their chest pain presentation, and use of a qualitative methodology to  
12 explore how these patients describe their symptoms. Qualitative methods can help  
13 overcome a narrow clinician focus and help develop a patient orientated view when  
14 exploring symptoms of disease.<sup>37 40 23 41</sup> The aim of the study was to investigate  
15 the symptoms people with diabetes experience when having a myocardial infarction,  
16 their illness narrative, and how they present their symptoms to the health service.  
17  
18  
19  
20  
21  
22  
23  
24  
25  
26  
27  
28  
29  
30  
31  
32  
33  
34  
35  
36  
37  
38  
39  
40  
41  
42  
43  
44  
45  
46  
47  
48  
49  
50  
51  
52  
53  
54  
55  
56  
57  
58  
59  
60

## Methods

This was a qualitative study where interviews were undertaken with a patients with DM who have recently had a confirmed MI, recruited within coronary care units (CCU). Eligibility criteria included a confirmed diagnosis of MI (according to AHA criteria <sup>42</sup>), a clinical diagnosis of DM and the ability to communicate (understand and speak) enough English to complete the interview. Clinical staff identified participants and ensured they were post-treatment, clinically stable and well enough to participate. This subjective judgement was made by the clinical staff involved in participants' care as required by the ethics committee. Participants were approached as soon as possible after the diagnosis by a researcher (NB) so we could be sure that they had had an MI (usually a retrospective or working diagnosis) and to minimise recall bias about symptoms. Once invited, they were given a patient information sheet (PIS) about the study and 24 hours to decide whether to participate (see comments regarding ethics approval). The interviews took place in three London, UK hospitals. We aimed to recruit consecutive patients (but this proved unworkable) so this was a pragmatic sample. <sup>43</sup>

The interviews were semi-structured and iterative building from a topic guide to include a narrative of the course, range, character and severity of the symptoms the person experienced before and during their MI. A checklist of AMI symptoms based on Funk's acute myocardial infarction (AMI) symptom list <sup>15</sup> This is distinct to Diamond and Forrester's classification of angina typicality.<sup>44</sup> The checklist was worked through to ensure symptoms were absent and not just omitted. Ideas about expected symptoms of an MI, and symptom attribution were also explored as people often develop complex narratives about their illnesses. <sup>45</sup> We also explored participants' thoughts about their illness, treatments they had attempted, motives and triggers for seeking help, awareness and knowledge of the symptoms of a heart attack.

Interviews were audio recorded, field notes and baseline patient information were noted. Details gathered included the type of MI (ECG changes, troponin level, clinical assessment), the patients' demographics, co-morbidities (type and duration of DM,

1  
2  
3 other disease), risk factors, family history, medication use and information that might  
4 impact on symptom perception, from the informant and their medical records. All  
5 participants were allocated a code number to link their data together and then  
6 anonymised (apart from the consent form) so that identifiable data did not leave the  
7 ward setting.  
8  
9  
10

11  
12 The audio taped interviews were transcribed verbatim and manually analysed using  
13 a thematic framework approach,<sup>22 46</sup> using word processing and spreadsheet  
14 software. Agreement was specifically sought between reviewers about the  
15 classification of symptoms as either typical or atypical as outlined by Funk.<sup>15</sup> Two  
16 independent researchers (NB, DDC) read the transcripts and analysed the data  
17 using the following steps: familiarisation, identifying a thematic framework, indexing,  
18 charting, mapping and interpretation. Throughout this process, transcripts were  
19 repeatedly re-read to focus on specific points and ideas, to verify the presence of the  
20 themes that are identified and ensure the context of the themes has been preserved.  
21 There was then a dialogue between all the researchers which was reflexive in nature  
22 linking the findings back to the study's aims. The analysis was deductive or  
23 theoretical in approach in that we were looking for themes around diabetes and  
24 myocardial infarction, and bounded by an expectation of probable reduced or absent  
25 pain symptomatology and this shaped our topic guide and approach to the data.  
26 However, the analysis was also inductive in nature, in that we needed to derive  
27 themes from the data, in as much that if there were no pain symptoms during the MI,  
28 we needed the participants and their narratives to tell us what they did experience.  
29 The themes around reporting of symptoms is semantic (or a surface meaning) in that  
30 we are largely reporting the participants' descriptions of their experience. However,  
31 the explanatory models around what participants thought caused their symptoms  
32 and reactions to those symptom is a much more latent thematic or interpretive  
33 analysis.<sup>22</sup> Representative quotes (with consent) were used and have identifying  
34 details to link the theme to the participants' characteristics.  
35  
36  
37  
38  
39  
40  
41  
42  
43  
44  
45  
46  
47  
48  
49  
50

51 The lay term "heart attack" is used extensively in the transcripts; this can have a  
52 broad popular meaning but we will assume is used by participants to suggest a  
53 myocardial infarction.  
54  
55  
56  
57  
58  
59  
60

1  
2  
3 Ethical approval for this study and the use of quotes was obtained from the  
4 Hertfordshire Research Ethics Committee. (Project no: 11/EE/0045). The committee  
5 requested that we allowed a “cool off” period of 24 hours from approach to obtaining  
6 consent. Data protection and local hospital trust R&D policies were followed.  
7  
8 Consent was not originally sought to disclose the full interview transcripts.  
9  
10

### 11 Patient involvement

12  
13  
14 The original idea for this study was based on a clinical encounter in general practice.  
15 A patient consulted MJ his GP, having suffered a severe MI despite having minimal  
16 symptoms and subsequently developed severe heart failure. Before his death, this  
17 patient agreed to support research in this area and filmed a brief video of his  
18 experiences. A broader study (with same research question but a different  
19 methodology) on this field was presented and supported by the North East London  
20 Diabetes Research Network Lay Panel Meeting in 2011. Patients’ narratives  
21 constitute the data underlying this study.  
22  
23  
24  
25  
26  
27  
28  
29  
30  
31  
32  
33  
34  
35  
36  
37  
38  
39  
40  
41  
42  
43  
44  
45  
46  
47  
48  
49  
50  
51  
52  
53  
54  
55  
56  
57  
58  
59  
60

## Results

Forty three participants were recruited from the participating hospitals, however 4 interviews proved unusable due to not meeting study recruitment criteria on detailed case review and were excluded, resulting in a total of 39 participants' data available for analysis. The interviews had a mean duration of 20mins 33 sec (with a range of 5 mins 14 secs to 48mins 46 secs) and were all undertaken by one interviewer; NB. The study comprised of 30 men and 9 women; with an age range of 40-90, 35 participants had type 2 DM and 4 had type 1 DM. All participants had confirmed acute coronary syndrome; 24 had NSTEMIs, 10 had STEMIs and 5 had other MIs (acute MI-unspecified including 4 cardiac arrests). Their ethnic categories were White British (n=18), Asian/ south Asian (n=7), African or Afro-Caribbean (n=3) and others (n=5) e.g. Turkish, Maltese etc. A number (n=6) declined to state their ethnicity or instead identified their religious affiliation e.g. "Church of England", "Jewish" etc. One interview was done via an informal family translator but frequently family members would participate in the interview, clarifying the order of events or reminding the participant about elements of their illness narrative (which may have been clouded by their illness including cardiac arrest or treatment such as strong opioid analgesics). Participants were usually approached to participate the day following admission, or the Monday following a weekend admission and then interviewed usually the following day after consenting to participate as per our ethics approval. Data saturation was achieved. Each participant was given a study number between 1 to 43 and quotes are linked e.g. participant 22 (P22)



## Themes

The analysis of the data led to the identification of the following themes and sub themes.

### Symptoms

- Typical vs atypical presentations
  - Atypical presentations
- Absence of pain

### Attribution and consequences

- Attributing symptoms to co-morbidities
  - Ascribing symptoms to DM
  - Ascribing symptoms to hypoglycaemia
- Delay in seeking help
- Gradual onset of symptoms
  - Multiple symptoms
- Lack of awareness of MI symptoms or their increased risk of MI
  - Experience of repeat MIs
- Language of pain
- Knowing “something was wrong”

However, these themes are not distinct. The nature of obtaining patients’ narratives means that there are complex, inseparable relationships in concepts and ideas, with a continuum across themes and subthemes.

### Symptoms

1  
2  
3 Participants described a wide range of symptoms, primarily around chest pain and  
4 discomfort. However, other symptoms associated with MI such as sweating and  
5 breathlessness were described, as well as a series of symptoms that are not usually  
6 associated with MI presentations. With regard to chest pain, we found a range of  
7 symptom presentations.  
8  
9

### 10 11 Typical versus atypical presentations.

12  
13 Chest pain of a specific character is regarded as the classic symptom of MI and was  
14 present in most of these interviews;  
15  
16

17  
18 *“It was like your chest was being crushed.” (P3)*  
19

20  
21 Many of these descriptions catch this essence of a typical MI;  
22

23  
24 *“Err a real dull ache and like someone is screwing up, like a tight chest just  
25 really tight, like someone is squeezing it inside....yeah like a really, really dull  
26 pain”... “it started hurting and made me feel really ill ...but then I went really  
27 pale & started sweating .. absolutely saturated.. just a really tight chest and  
28 sore like, as if there was a weight directly on top of me”. (P 11)*  
29  
30  
31

32  
33 Most of those in the study experienced some typical symptoms. However, typical  
34 symptoms with a recent chronology (necessary to suspect MI) was not always  
35 present or immediately apparent in the interviews.  
36  
37

38  
39 Some experienced sweating; regarded as a typical MI symptom;  
40

41  
42 *“My night clothes were soaking wet.” (P3).*  
43

44  
45 Breathlessness was also experienced either with pain or separately, which although  
46 classed as a “typical” symptom [23], is not generally recognised by clinicians to be  
47 suggestive of an MI;  
48

49  
50 *“I can’t breathe, you couldn’t breathe, my wife she phone a medic ... No you  
51 got the pain and you can’t breathe...you think you’re gonna die for the lack of  
52 breath”, (P14)*  
53

54  
55 *“Like somebody’s pushing me...and I’m short of breath and then it was getting  
56 worse and it start burning”. (P35)*  
57  
58  
59  
60

### Atypical pain

Some of those in this study sometimes narrated their experience of a diffuse and ambiguous set of symptoms that may not raise suspicion of MI;

*"It feels like something crawling up my arm... and it bites deep in there...the only way I can describe it, it feels like someone is in there with claws and they're tearing at your inside. Just screaming and pulling at it. Very, very strange pain indeed", (P24)*

although this person later describes quite typical sounding symptoms. Others described the quality of their pain;

*"It was just sticking pain, it was just a really pain, stay there for about 3 hours", (P30)*

*"Like a normal pain, it wasn't a pain, actually it was dull". (P26)*

These quotes raise the issue of participants' use of language which is discussed later.

The following quote illustrates a mixture of some typical and atypical symptoms;

*"I can feel something happening you know, my chest, had very bad pain in my arm, my neck and my leg, I couldn't move... Yeah sharp pain, very sharp ...Somebody was pressing my, you know, chest...My back... All the way up to the waist...I couldn't breathe you know. I get very deep breath, I tried to do it but it didn't go, somebody was choking me". (P5)*

The inseparability of these two types of symptoms (typical/ atypical) is raised in the discussion.

Symptoms of weakness and tiredness were also reported around the timing of the MI. One participant could not walk and said;

*"It's just the sheer um lethargy really, I just couldn't do anything...I wasn't giddy and I wasn't in a lot of pain, I just couldn't sort of come to, I was, I couldn't put one foot in front of the other. I was just so weak". (P10)*

### Absence of pain

1  
2  
3 Some clearly stated they had no chest pain;

4  
5 *“Nothing, nothing, no discomfort, no pain” (pre cardiac arrest), (P27)*

6  
7  
8 but this participant did have pain after being resuscitated. Another reported;

9  
10 *“No pain, no sweating, nothing else” (pre cardiac arrest). (P23)*

11  
12 Both of these participants experienced cardiac arrests, so some degree of event  
13 amnesia cannot be excluded.

### 14 15 16 17 Attribution and consequences

#### 18 19 Attributing symptoms to co-morbidities

20  
21 The participants seemed to rationalise their symptoms and find a reason to dismiss  
22 that the cause of their symptoms could be a “heart attack”. Many attributed their  
23 symptoms to other illness and causes. Most commonly, they attributed their  
24 symptoms to other illness and causes. Most commonly, they attributed their  
25 symptoms to indigestion leading to self-medication with antacids for this;

26  
27  
28  
29 *“when you feel bloated and gassy and it’s similar to that sort of pain. That’s*  
30 *why I mistook it for being indigestion.... I put it down to nerves or exercise*  
31 *...but then in the early hours of Sunday morning I realised it couldn’t have*  
32 *been indigestion because it was paining me a great deal”, (P31)*

33  
34  
35  
36  
37 *“I took, bicarb of soda, didn’t work. I took um Gaviscon (antacid remedy),*  
38 *didn’t work. The antibiotics didn’t work. That’s when I knew, there was more to*  
39 *this”. (P3)*

40  
41  
42 but symptoms were also attributed to other causes that included asthma, muscular  
43 aches, panic attacks, stress and importantly in this group, their DM;

44  
45  
46  
47 *“Because of, I have other illness(es), like blood pressure, diabetes, I didn’t think*  
48 *(of MI), because I thought there is nothing wrong with my heart.” (P4).*

49  
50  
51 These quotes also link to the theme of delay (both by patient and clinician in this  
52 instance) which is discussed further on.

#### 53 54 55 Ascribing symptoms to DM

1  
2  
3 Participants sometimes specifically attributed their symptoms to (lack) of control of  
4 their DM, symptoms of DM or side effects of their medication;  
5  
6

7 *"I didn't realise I was having heart attack, so I was feeling rotten ...I was*  
8 *hungry. Well I wasn't really hungry but I know, don't, diabetic, ...that's when*  
9 *the pain come, and I went to bed and it woke me up around 2 in the morning",*  
10 *(P17)*  
11  
12

13  
14 *"Well dizzy, tired, again I'm dizzy all the time with diabetes, you get that, that's*  
15 *part and parcel of being diabetic". (P17)*  
16  
17

18  
19 Participant 3 also attributed her dizziness during her MI to her DM;  
20

21 *"Not fainting, but you know dizzy turns, because I do get these dizzy turns.*  
22 *You see, this is all in with the diabetes you see". (P3)*  
23  
24

#### 25 Ascribing symptoms to hypoglycaemia

26

27  
28 Patients when experiencing some symptoms, particularly sweating and feeling  
29 unwell perceived themselves to be experiencing hypoglycaemia ("Hypo"), for  
30 example;  
31  
32

33 *"because I am diabetic, right, um, I thought, initially I thought it was um low*  
34 *blood sugar", (P2.)*  
35  
36

37 *"A little (of sweating) bit, but ...I didn't have my testing gear with me & I*  
38 *thought that it might be a hypo at the time". (P11)*  
39  
40

41  
42 Participant 3 perceived herself to be experiencing hypoglycaemia;  
43

44 *"That's when I knew, there was more to this (symptoms) and I had, I don't*  
45 *know whether I had five hypo's in that week, but I was rolling all over the*  
46 *place". (P3).*  
47  
48

#### 49 Delay in seeking help

50

51  
52 Delay in help seeking was a prominent feature in these narratives;  
53  
54

55 *"I think to be honest it (chest pain) came on suddenly but I tended to ignore it,*  
56 *I've got one more screw to put in", (P21)*  
57  
58  
59  
60

1  
2  
3 *"I waited till my GP opened in the morning. I called him and I told him what's*  
4 *wrong, they said 'just phone the ambulance' ". (P5).*  
5  
6

7 This delay could be ascribed to participants' failure to attribute symptoms to MI,  
8 attribution to co-morbidities, lack of symptom awareness or lack of awareness of  
9 increased risk of MI; but participants often realised that something more serious was  
10 occurring when their symptoms did not improve;  
11  
12

13  
14 *"But it was there too long, so I said 'could be heart attack' ". (P30)*  
15  
16

17 Often participants had dismissed or explained away these one off or minor  
18 symptoms and did not think much of them, except with hindsight;  
19  
20

21 *"more during the week. Nothing sharp... it was just a niggling thing, it just*  
22 *came and then it went away ... you just didn't think too much of any of these*  
23 *factors in isolation; but together". (P31)*  
24  
25  
26

27 With others, denial was behind their delay;  
28

29 *"Well I thought it was a heart attack but I didn't really want to admit it at the*  
30 *time. Anything other than a heart attack". (P17)*  
31  
32  
33  
34  
35

### 36 Gradual onset of symptoms

  
37

38 For some participants part of this delay was the gradual rather than sudden onset of  
39 symptoms;  
40  
41

42 *"Well no ...it had happened a fortnight before"... "Sat in the chair for about*  
43 *20mins and then it went so then I said to my wife, I told her 'If it happens*  
44 *again I would be calling the doctor' ". (P20)*  
45  
46  
47

### 48 Multiple symptoms

  
49

50 The respondents often had complex narratives where chest pain was a part of the  
51 symptom complex they described, but their chest pain symptom may not have been  
52 the most prominent, important or distressing feature; exemplified by the following  
53 quote;  
54  
55  
56  
57  
58  
59  
60

1  
2  
3 *"It (chest pain) did come on suddenly ...at the same time I had this very heavy*  
4 *perspiration...& this very uncomfortable tummy ache...Err all three things*  
5 *hitting me at once; you don't pick one out in particular ...all those three factors*  
6 *the er tummy ache the excessive err sweating and the pain in the chest um I*  
7 *could point to one and say look that was the main problem.. they were all a*  
8 *problem at that short period of time". (P 25)*  
9  
10  
11  
12

### 13 14 15 16 Lack of awareness of MI symptoms or their increased risk of MI

17  
18 Many of these respondents, despite having long standing diabetes, previous cardiac  
19 events or a strong family history, seemed unaware that they were at a high risk of  
20 subsequent MI;  
21  
22

23  
24  
25 *"I thought ...how can I have a heart attack? Right. But you see, this might be*  
26 *relevant as well; both my side of my family, my mother's side and my father's*  
27 *side are diabetic. My father had a heart attack as well and he died from it. My*  
28 *mother had a triple heart bypass. My elder brother's had an angioplasty, right,*  
29 *so it does run in the family" (P2)*  
30  
31  
32

### 33 34 Experiences of a repeat MI

35  
36 Participants who had previous MIs might be expected to have a good working  
37 knowledge of these symptoms and respond accordingly if it recurred. We found  
38 however that often they did not do so;  
39  
40

41  
42 *"I should have guessed, right, um, it's exactly the same symptoms as when I*  
43 *had my first heart attack". (P2)*  
44  
45

### 46 Language of pain

47  
48 The expectation of severe chest pain is key to many patients' and doctors' model of  
49 what an MI should be like and is apparent in some of the previous themes. However,  
50 many of these respondents had symptoms that they didn't feel reached a threshold  
51 of severity that they would call "pain";  
52  
53  
54

55  
56 *"I suppose people would call it a pain, I don't know, I wouldn't, I would still call*  
57 *it severe discomfort...dull, rather than, no it wasn't sharp.... I won't put it (pain*  
58  
59  
60

1  
2  
3 severity score) higher, otherwise I probably would have called an ambulance  
4 straight away”, (P20)  
5  
6

7 “No, it was a constant. When I say pain, ache, it wasn’t a pain that was  
8 making me double up or anything”. (P25)  
9

10  
11 While some struggled to conceptualise their symptoms as pain, others struggled to  
12 use words to describe their symptoms;  
13

14  
15 *“It’s so difficult cos it was more uncomfortable than a pain that you can  
16 describe ... I don’t know how to describe it”. (P20)*  
17  
18

19 While others clearly had very significant pain but still struggled to articulate it;  
20

21  
22 *“Indescribable to me, I couldn’t, as I sit here I can’t describe it... I had severe  
23 pain and it was; I don’t know how you break it down into words”. (P19)*  
24  
25

#### 26 Knowing “something is wrong” 27

28 Frequently participants had a “gut feeling” that there was something wrong or a  
29 strong emotional response to their symptoms;  
30  
31

32  
33 *“You know, I could sort of feel that there was something wrong”, (P2).*  
34

35 *“And I thought I can’t do this, I got to get ‘elp, and that’s when I dialled 999...  
36 and, you know, everything was going wrong, and I just couldn’t figure out”.  
37 (P3).*  
38  
39

40 A “sense of doom” is often associated with the presentation of MI, but in this group  
41 only a few participants reported a strong sense of impending death;  
42  
43  
44

45 *“I felt as if I was going to die (anxious voice)”. (P6)*  
46  
47  
48  
49  
50  
51  
52  
53  
54  
55  
56  
57  
58  
59  
60



## Discussion

We found that patients with DM who experienced an MI exhibited a wide range of symptoms from very classical presentations to very mild symptoms.<sup>23</sup> Patients often were unclear what caused their symptoms.<sup>47</sup> This diagnostic confusion or uncertainty appears periodically to have been mirrored by clinicians.<sup>9 24</sup>

The symptoms experienced in this group ranged from those that may be expected by health care professionals, to more atypical symptoms with patients using unusual descriptive terms. The variation in experiences highlights the difficulty for both patients and healthcare providers to correctly attribute these symptoms to a cardiac event.

Patients with DM will often have other significant co-morbidities which can be attributed to their symptoms e.g. breathlessness from chronic obstructive pulmonary disease (COPD) rather than an MI. However, there seems to be an important area of confusion from symptoms related to DM and its control, that can lead to a misattribution of pain symptoms away from a new onset MI. A specific issue among this group is the impact of MI symptoms which were perceived as a side effect of medication (particularly insulin and oral hypoglycaemics). Interpreting episodes of hypoglycaemia and sudden onset MI seems to be particularly challenging with an overlap of many similar symptoms and their sudden onset.<sup>25</sup>

We found participants had a lack of knowledge of MI symptoms, were falsely reassured by the lack of severe pain or did not conceptualise their milder chest discomfort as chest pain. These factors may all lead to denial or confusion and therefore delay in seeking care.<sup>33</sup> Delay in seeking medical attention during an MI, will have significant prognostic implications.

As the participants' symptoms did not fit with their preconceived ideas of an MI,<sup>25</sup> they ascribed it to other less serious causes, or importantly attributed their symptoms to their DM, medication side effects or "hypos"; which is a novel and important finding. The attenuated chest pain competing with other, perhaps more distressing symptoms and so being "crowded out" from the illness cognition of a possible MI, has not been previously reported.

### Strengths

Within this study we have reported contemporaneous symptoms from a well described patient group, who can be characterised by their MI diagnosis. We have captured a wide range of participants with MI, by using biochemical confirmation of diagnosis wherever possible, but also by including clinical diagnoses (e.g. for cardiac arrests). Unusually for a qualitative study we have a relatively large number of participants, who were interviewed as early as possible (or allowed to) after the event to reduce recall bias.<sup>48</sup>

### Limitations

Despite recruiting participants on the basis of their MI diagnosis, but not specifically on chest pain presentations, participants are likely to have initially volunteered chest pain symptoms to get admitted to a coronary care unit. Markedly discrepant MI narratives are less likely to be represented in this study, as are silent MIs, as they are more likely to go unrecognised and present late. Survivor bias is also a distinct possibility.<sup>21</sup> While a study size of 39 is good for qualitative research,<sup>48</sup> it is small in comparison with epidemiological studies so this methodology is therefore unlikely to pick up rarer presentations of MI.

Recruiting on the basis of being able to converse in English will exclude the linguistic nuance of other languages and cultures; important when south Asian populations among others, have a high risk of DM and coronary heart disease. However, we did successfully capture many patients who had English as second language. Additionally the UK NHS struggles to provide reliable, accessible translation; particularly in the acute and out of hours setting, so our findings may more faithfully reflect the real world setting of these decisions and presentations.

Truncating these interviews into quotes also runs the danger of falsely dichotomising symptoms into “typical” and “atypical”. When the transcripts are read in full and in context, a more rounded picture of the event develops. This nuanced view is probably a key element that helps experienced clinicians successfully identify a potential MI, in this group of patients.

### How this fits into existing literature

The findings of our study link with previous work within a broad context of psychological models of illness behaviour such as health belief models.<sup>49</sup> We have used our findings to adapt Rosenstock and Kirsch's health belief model<sup>49</sup> (see figure 1) so that the impact of DM can modify the steps in the model such as reduced pain from neuropathy during an MI reducing the likelihood of action.

Diagram here (figure 1)

The language of describing pain and particularly the difficulty of describing pain recurs within our sample. Scarry describes this as the "inexpressibility of pain"<sup>50</sup> and this is seen with some respondents. Others use metaphor and simile to circumvent this issue, which may be helpful to the patient but means a clinician might cognitively process such symptom descriptions as "atypical" or "non cardiac", leading to misdiagnosis and delays in treatment. The term "chest pain" is also problematic<sup>38</sup>; many of these participants did not conceptualise their chest symptoms as pain and so, Miller has suggested using the term "chest sensation" instead.<sup>51</sup>

Our findings have some similarities to other studies about patients' experiences of MI.<sup>23 24 25 26</sup> The similarity of symptom presentation raises the possibility that these studies are just capturing the heterogeneous array of MI symptoms and this is unlinked to any underlying physiological or pathological process such as gender or DM. However, our finding of patient misattribution of MI symptoms to DM and diabetic medication, in a group at high risk of MI, does have significant clinical implications for patients and clinicians.

### Implications for further research

Despite knowing that people with DM are at much higher risk of coronary events we fail to inform patients in the UK about their increased cardio-vascular risk nor identify early those who may be developing such problems. Whether screening people with diabetes for ischaemic heart disease would be beneficial remains a key question. Possibilities include trialling patient education about their CHD risk and its

1  
2  
3 presentation in the UK Quality and Outcome (QOF) DM check or including this  
4 information within DESMOND (desmond-project.org.uk)/DAFNE ([www.dafne.uk.com](http://www.dafne.uk.com))  
5 patient education programmes, but there would be considerable difficulty in  
6 designing an educational package that could reliably help patients distinguish  
7 between these two aetiological possibilities of “hypo” versus MI.  
8  
9

### 10 Implications for practice

11  
12 This study could contribute towards increased awareness of MI in those with DM.  
13 Patients with DM should be made aware of their increased risk of cardiac events,  
14 how they present and how they differ from medication side effects and “hypos”.  
15 Clinicians should carefully explore patients with diabetes and their symptoms as well  
16 as their interpretation of their symptoms.  
17  
18  
19  
20  
21  
22

#### 23 a. Contributorship statement

24 All 3 authors fulfil all three of the ICMJE guidelines for authorship, MJ had the  
25 original study conception and design and then supervised NB during her iBSc  
26 project. NB collected all the data. NB and DDC analysed the final data set. MJ  
27 wrote the final manuscript with substantial intellectual input from NB and DDC.  
28 All authors approved the final manuscript.  
29  
30  
31  
32

#### 33 b. Competing interests

34 None  
35

#### 36 c. Funding

37 Royal College of General Practitioners’ Scientific foundation board (grant SFB  
38 2011-25). The original project was part of the UCL iBSc in primary health care  
39 and formed NB’s dissertation, supervised by MJ.  
40  
41  
42  
43

#### 44 d. Data sharing statement

45 No additional data are available as participants only consented to quotes  
46 being published.  
47  
48

### 49 Figure legend

50  
51 Figure 1: How diabetes (grey boxes) might affect the “Health Belief model” during  
52 MI  
53  
54

55 With permission from Fig 1. page 115 (adapted) from Victor J. Strecher and Irwin  
56 M. Rosenstock, “The health belief model”, Andrew Baum, Stanton Newman, John  
57 Weinman, Robert West, Chris McManus (eds.), (1997), “Cambridge Handbook of  
58  
59  
60

Psychology, Health and Medicine, 9780521436861, Cambridge : Cambridge University

#### Reference List

1. González ELM, Johansson S, Wallander MA, et al. Trends in the prevalence and incidence of diabetes in the UK: 1996 to 2005. *Journal of Epidemiology and Community Health* 2009;**63**(4):332-36.
2. Wannamethee SG, Shaper AG, Lennon L. Cardiovascular disease incidence and mortality in older men with diabetes and in men with coronary heart disease. *Heart* 2004;**90**(12):1398-403.
3. Shah AD, Langenberg C, Rapsomaniki E, et al. Type 2 diabetes and incidence of cardiovascular diseases: a cohort study in 1.9 million people. *The Lancet Diabetes & Endocrinology* 2015;**3**(2):105-13.
4. . The Emerging Risk Factors Collaboration. Diabetes Mellitus, Fasting Glucose, and Risk of Cause-Specific Death. *New England Journal of Medicine* 2011;**364**(9):829-41.
5. Huxley R, Barzi F, Woodward M. Excess risk of fatal coronary heart disease associated with diabetes in men and women: meta-analysis of 37 prospective cohort studies. *BMJ* 2006;**332**(7533):73-78.
6. Stamler J, Vaccaro O, Neaton JD, et al. Diabetes, other risk factors, and 12-yr cardiovascular mortality for men screened in the Multiple Risk Factor Intervention Trial. *Diabetes Care* 1993;**16**(2):434-44.
7. Haffner SM, Lehto S, Ronnema T, et al. Mortality from Coronary Heart Disease in Subjects with Type 2 Diabetes and in Nondiabetic Subjects with and without Prior Myocardial Infarction. *The New England Journal of Medicine* 1998;**339**(4):229-34.
8. Brophy S, Cooksey R, Gravenor M, et al. Population based absolute and relative survival to 1 year of people with diabetes following a myocardial infarction: A cohort study using hospital admissions data. *BMC Public Health* 2010;**10**(1):338.
9. Sequist TD, Marshall R, Lampert S, et al. Missed opportunities in the primary care management of early acute ischemic heart disease. *Archives of Internal Medicine* 2006;**166**(20):2237-43.
10. Asaria P, Elliott P, Douglass M, et al. Acute myocardial infarction hospital admissions and deaths in England: a national follow-back and follow-forward record-linkage study. *The Lancet Public Health*;2017. 10.1016/S2468-2667(17)30032-4.
11. Ångerud KH, Brulin C, Näslund U, et al. Longer pre-hospital delay in first myocardial infarction among patients with diabetes: an analysis of 4266 patients in the Northern Sweden MONICA Study. *BMC Cardiovascular Disorders* 2013;**13**(1):6.
12. Canto JG, Shlipak MG, Rogers W.J., Malmgren JA, Frederick PD, Lambrew CT, Ornato JP, Barron HV, Kiefe C.I. Prevalence, clinical characteristics, and mortality among patients with myocardial infarction presenting without chest pain. *JAMA* 2000;**283**(24):3223-29.
13. Brieger D, Eagle KA, Goodman SG, et al. Acute Coronary Syndromes Without Chest Pain, An Underdiagnosed and Undertreated High-Risk Group: Insights From The Global Registry of Acute Coronary Events. *Chest* 2004;**126**(2):461-69.
14. Arslanian-Engoren C, Patel A, Fang J, et al. Symptoms of Men and Women Presenting With Acute Coronary Syndromes. *The American Journal of Cardiology* 2006;**98**(9):1177-81.

15. Funk M, Naum JB, Milner KA, et al. Presentation and symptom predictors of coronary heart disease in patients with and without diabetes. *AmJ EmergMed* 2001;**19**(6):482-87.
16. Kentsch M RU, Gitt AK, Schiele R, Wienbergen H, Schubert J, Muller-Esch G, Ittel TH, Mitusch R, Tschoepe D, Senges J. Angina intensity is not different in diabetic and non-diabetic patients with acute myocardial infarction. *Zeitschrift fur Kardiologie* 2003;**92**(10):817-24.
17. Stephen SA, Darney BG, Rosenfeld AG. Symptoms of acute coronary syndrome in women with diabetes: An integrative review of the literature. *Heart & Lung: The Journal of Acute and Critical Care* 2005;**37**(3):179-89.
18. DeVon HA, Penckofer SM, Zerwic JJ. Symptoms of unstable angina in patients with and without diabetes. *ResNursHealth* 2005;**28**(2):136-43.
19. Richman PB, Brogan GX, Nashed AN, et al. Clinical Characteristics of Diabetic vs Nondiabetic Patients Who "Rule-in" for Acute Myocardial Infarction. *Academic Emergency Medicine* 1999;**6**(7):719-23.
20. Airaksinen KE, Koistinen MJ. Association between silent coronary artery disease, diabetes, and autonomic neuropathy. Fact of fallacy? *Diabetes Care* 1992;**15**(2):288-92.
21. Saracci R. Survival-related biases survive well. *International Journal of Epidemiology* 2007;**36**(1):244-46.
22. Braun V, Clarke V. What can "thematic analysis" offer health and wellbeing researchers? *International Journal of Qualitative Studies on Health and Well-being*; Vol 9 (2014) 2014.
23. Lichtman JH, Leifheit-Limson EC, Watanabe E, et al. Symptom Recognition and Healthcare Experiences of Young Women With Acute Myocardial Infarction. *Circulation: Cardiovascular Quality and Outcomes* 2015;**8**(2 suppl 1):S31-S38.
24. Coventry LL, van Schalkwyk JW, Thompson P, et al. Myocardial infarction, patient decision delay and help seeking behaviour: a thematic analysis. *Journal of Clinical Nursing* 2016:DOI: 10.1111/jocn.13607.
25. Ängerud KH, Brulin C, Eliasson M, et al. The Process of Care-seeking for Myocardial Infarction Among Patients With Diabetes. *The Journal of Cardiovascular Nursing* 2015;**30**(5):E1-E8.
26. DeVon HA, Hogan N, Ochs AL, et al. Time to Treatment for Acute Coronary Syndromes: The Cost of Indecision. *Journal of Cardiovascular Nursing* 2010;**25**(2):106-14.
27. MacDermott AF. Living with angina pectoris--a phenomenological study. *Eur J CardiovascNurs* 2002;**1**(4):265-72.
28. Tod AM, Read C, Lacey A, et al. Barriers to uptake of services for coronary heart disease: qualitative study. *BMJ* 2001;**323**(7306):214.
29. Fitzsimons D, Parahoo K, Richardson SG, et al. Patient anxiety while on a waiting list for coronary artery bypass surgery: a qualitative and quantitative analysis. *Heart Lung* 2003;**32**(1):23-31.
30. Johansson I, Swahn E, Strömberg A. Manageability, vulnerability and interaction: A qualitative analysis of acute myocardial infarction patients' conceptions of the event. *European Journal of Cardiovascular Nursing* 2007;**6**(3):184-91.
31. Nymark C, Mattiasson A-C, Henriksson P, et al. The turning point: from self-regulative illness behaviour to care-seeking in patients with an acute myocardial infarction. *Journal of Clinical Nursing* 2009;**18**(23):3358-65.
32. Pattenden J, Watt I, Lewin RJP, et al. Decision making processes in people with symptoms of acute myocardial infarction: qualitative study. *BMJ* 2002;**324**(7344):1006.
33. Dracup K, Moser DK, Eisenberg M, et al. Causes of delay in seeking treatment for heart attack symptoms. *Social Science & Medicine* 1995;**40**(3):379-92.
34. Emslie C, Hunt K, Watt G. "I'd rather go with a heart attack than drag on": lay images of heart disease and the problems they present for primary and secondary prevention. *Coronary Health Care* 2001;**5**:25-32.

- 1
- 2
- 3 35. Stephen SA, Darney BG, Rosenfeld AG. Symptoms of acute coronary syndrome in women with
- 4 diabetes: An integrative review of the literature. *Heart & Lung: The Journal of Acute and*
- 5 *Critical Care* 2008;**37**(3):179-89.
- 6
- 7 36. White AK, Johnson M. Men making sense of their chest pain--niggles, doubts and denials. *J Clin*
- 8 *Nurs* 2000;**9**(4):534-41.
- 9
- 10 37. Mayer D D.; Rosenfeld A. Symptom interpretation in women with diabetes and myocardial
- 11 infarction: a qualitative study. *Diabetes Educator* 2006;**32**(6):918-24.
- 12
- 13 38. Treasure T. Pain is not the only feature of heart attack. *BMJ* 1998;**317**:602.
- 14
- 15 39. Albarran JW, Clarke BA, Crawford J. 'It was not chest pain really, I can't explain it!' An exploratory
- 16 study on the nature of symptoms experienced by women during their myocardial infarction.
- 17 *J Clin Nurs* 2007;**16**(7):1292-301.
- 18
- 19 40. Farmer SA, Higginson IJ. Chest Pain: Physician Perceptions and Decision making in a London
- 20 Emergency Department. *Annals of Emergency Medicine* 2006;**48**(1):77-85.
- 21
- 22 41. Jones MM, Somerville C, Feder G, et al. Patients' descriptions of angina symptoms: a qualitative
- 23 study of primary care patients. *BrJGenPract* 2010;**60**:735-41.
- 24
- 25 42. Thygesen K, Alpert JS, White HD, et al. Universal Definition of Myocardial Infarction. *Circulation*
- 26 2007;**116**(22):2634-53.
- 27
- 28 43. Emmel N. *Sampling and choosing cases in qualitative research: a realist approach*. London 2013:
- 29 Sage.
- 30
- 31 44. Diamond GA, Forrester JS. Analysis of probability as an aid in the clinical diagnosis of coronary-
- 32 artery disease. *NEngJ Med* 1979;**300**(24):1350-58.
- 33
- 34 45. Kleinman A. *The illness narratives: Suffering, healing, and the human condition*: Basic books,
- 35 1988.
- 36
- 37 46. Ritchie J, Spencer E. *Qualitative data analysis for applied policy research*. London: Routledge,
- 38 1994.
- 39
- 40 47. Kirchberger I, Heier M, Wende R, et al. The patient's interpretation of myocardial infarction
- 41 symptoms and its role in the decision process to seek treatment: the MONICA/KORA
- 42 Myocardial Infarction Registry. *Clinical Research in Cardiology* 2012;**101**(11):909-16.
- 43
- 44 48. Baker SE, Edwards R. How many qualitative interviews is enough? Expert voices and early career
- 45 reflections on sampling and cases in qualitative research. Secondary How many qualitative
- 46 interviews is enough? Expert voices and early career reflections on sampling and cases in
- 47 qualitative research 2012. [http://eprints.ncrm.ac.uk/2273/4/how\\_many\\_interviews.pdf](http://eprints.ncrm.ac.uk/2273/4/how_many_interviews.pdf)
- 48
- 49 49. Strecher VJ, Rosenstock IM. The health belief model. *Cambridge handbook of psychology, health*
- 50 *and medicine* 1997:113-17.
- 51
- 52 50. Scarry E. *The body in pain*. New York: Oxford University Press, 1985.
- 53
- 54 51. Miller CL. Symptom reflections of women with cardiac disease and advanced practice nurses: a
- 55 descriptive study. *ProgCardiovascNurs* 2003;**18**(2):69-76.
- 56
- 57
- 58
- 59
- 60

1  
2  
3  
4  
5  
6  
7  
8  
9  
10  
11  
12  
13  
14  
15  
16  
17  
18  
19  
20  
21  
22  
23  
24  
25  
26  
27  
28  
29  
30  
31  
32  
33  
34  
35  
36  
37  
38  
39  
40  
41  
42  
43  
44  
45  
46  
47  
48  
49  
50  
51  
52  
53  
54  
55  
56  
57  
58  
59  
60

Figure 1: How diabetes (grey boxes) might affect the "Health Belief model" during MI  
 With permission from Fig 1, page 115 (adapted) from Victor J. Strecher and Irwin M. Rosenstock, "The health belief model", Andrew Baum, Stanton Newman, John Weinmar, Robert West, Chris McManus (eds.), (1997), "Cambridge Handbook of Psychology, Health and Medicine, 9780521436861, Cambridge : Cambridge University

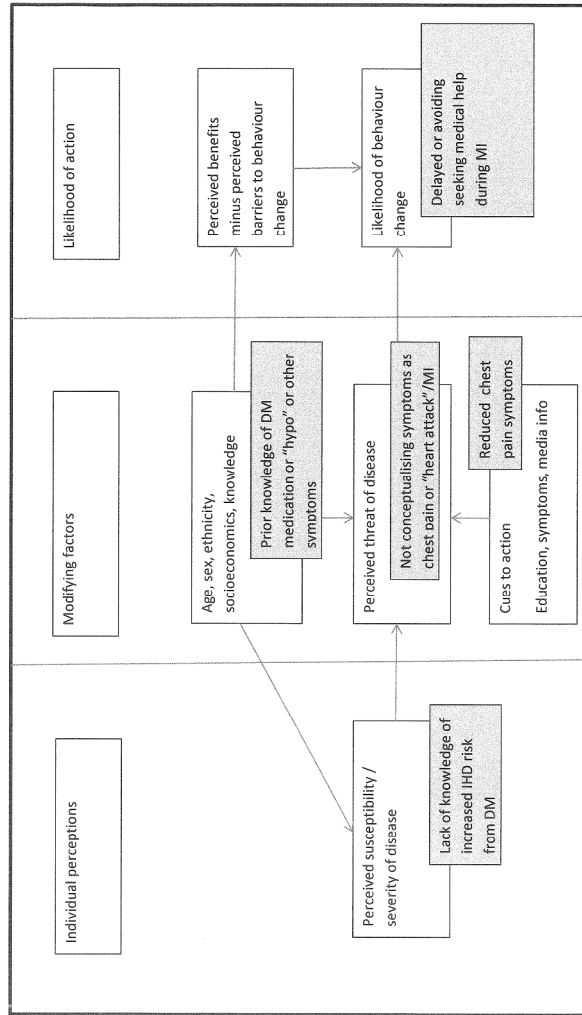

Figure 1- How diabetes (grey boxes) might effect the health belief model during MI

296x419mm (300 x 300 DPI)



|                                                        | Item                                           | Guide questions/description                                                                                                                                       | Author completed                                                                                      | Location                                                         |
|--------------------------------------------------------|------------------------------------------------|-------------------------------------------------------------------------------------------------------------------------------------------------------------------|-------------------------------------------------------------------------------------------------------|------------------------------------------------------------------|
| <b>Domain 1:<br/>Research team<br/>and reflexivity</b> |                                                |                                                                                                                                                                   |                                                                                                       |                                                                  |
| Personal<br>Characteristics                            |                                                |                                                                                                                                                                   |                                                                                                       |                                                                  |
| 1                                                      | Interviewer/<br>facilitator                    | Which author/s conducted<br>the interview or focus<br>group?                                                                                                      | NB                                                                                                    | See Methods p6                                                   |
| 2                                                      | Credentials                                    | What were the researcher's<br>credentials? <i>E.g. PhD, MD</i>                                                                                                    | MD MSc (MJ)<br>undergraduate (NB),<br>BSc (DDC)                                                       | Online<br>submission<br>details                                  |
| 3                                                      | Occupation                                     | What was their occupation<br>at the time of the study?                                                                                                            | Sen Lect (MJ), MB BS /<br>iBSc student (NB),<br>student/junior doc<br>(DDC)                           | Cover sheet p1                                                   |
| 4                                                      | Gender                                         | Was the researcher male or<br>female?                                                                                                                             | Both genders                                                                                          |                                                                  |
| 5                                                      | Experience and<br>training                     | What experience or training<br>did the researcher have?                                                                                                           | MJ extensive research<br>and research<br>supervision, NK / DDC<br>developed expertise<br>during study |                                                                  |
| Relationship with<br>participants                      |                                                |                                                                                                                                                                   |                                                                                                       |                                                                  |
| 6                                                      | Relationship<br>established                    | Was a relationship<br>established prior to study<br>commencement?                                                                                                 | no                                                                                                    |                                                                  |
| 7                                                      | Participant<br>knowledge of<br>the interviewer | What did the participants<br>know about the researcher?<br><i>e.g. personal goals, reasons<br/>for doing the research</i>                                         | Information as set out<br>in pt info leaflet as<br>agreed by IRC/ ethics<br>committee                 | Methods<br>section p6                                            |
| 8                                                      | Interviewer<br>characteristics                 | What characteristics were<br>reported about the<br>interviewer/facilitator?<br><i>e.g. Bias, assumptions,<br/>reasons and interests in the<br/>research topic</i> | NK identified as medical<br>student, MJ as academic<br>and clinician                                  | Patient<br>information<br>sheet (PIS)<br>available on<br>request |

|    |                               |                                       |                                                                                                                                                                 |                                                                                                                                       |                       |
|----|-------------------------------|---------------------------------------|-----------------------------------------------------------------------------------------------------------------------------------------------------------------|---------------------------------------------------------------------------------------------------------------------------------------|-----------------------|
| 1  | <b>Domain 2: study design</b> |                                       |                                                                                                                                                                 |                                                                                                                                       |                       |
| 2  |                               |                                       |                                                                                                                                                                 |                                                                                                                                       |                       |
| 3  | Theoretical framework         |                                       |                                                                                                                                                                 |                                                                                                                                       |                       |
| 4  |                               |                                       |                                                                                                                                                                 |                                                                                                                                       |                       |
| 5  |                               |                                       |                                                                                                                                                                 |                                                                                                                                       |                       |
| 6  |                               |                                       |                                                                                                                                                                 |                                                                                                                                       |                       |
| 7  |                               |                                       |                                                                                                                                                                 |                                                                                                                                       |                       |
| 8  |                               |                                       |                                                                                                                                                                 |                                                                                                                                       |                       |
| 9  | 9                             | Methodological orientation and Theory | What methodological orientation was stated to underpin the study? <i>e.g. grounded theory, discourse analysis, ethnography, phenomenology, content analysis</i> | Thematic analysis (Ritchie and Spencer)                                                                                               | Methods section p 6-7 |
| 10 |                               |                                       |                                                                                                                                                                 |                                                                                                                                       |                       |
| 11 |                               |                                       |                                                                                                                                                                 |                                                                                                                                       |                       |
| 12 |                               |                                       |                                                                                                                                                                 |                                                                                                                                       |                       |
| 13 |                               |                                       |                                                                                                                                                                 |                                                                                                                                       |                       |
| 14 |                               |                                       |                                                                                                                                                                 |                                                                                                                                       |                       |
| 15 |                               |                                       |                                                                                                                                                                 |                                                                                                                                       |                       |
| 16 |                               |                                       |                                                                                                                                                                 |                                                                                                                                       |                       |
| 17 | Participant selection         |                                       |                                                                                                                                                                 |                                                                                                                                       |                       |
| 18 |                               |                                       |                                                                                                                                                                 |                                                                                                                                       |                       |
| 19 |                               |                                       |                                                                                                                                                                 |                                                                                                                                       |                       |
| 20 | 10                            | Sampling                              | How were participants selected? <i>e.g. purposive, convenience, consecutive, snowball</i>                                                                       | Pragmatic sample                                                                                                                      | Methods section p 6-7 |
| 21 |                               |                                       |                                                                                                                                                                 |                                                                                                                                       |                       |
| 22 |                               |                                       |                                                                                                                                                                 |                                                                                                                                       |                       |
| 23 |                               |                                       |                                                                                                                                                                 |                                                                                                                                       |                       |
| 24 |                               |                                       |                                                                                                                                                                 |                                                                                                                                       |                       |
| 25 |                               |                                       |                                                                                                                                                                 |                                                                                                                                       |                       |
| 26 |                               |                                       |                                                                                                                                                                 |                                                                                                                                       |                       |
| 27 |                               |                                       |                                                                                                                                                                 |                                                                                                                                       |                       |
| 28 | 11                            | Method of approach                    | How were participants approached? <i>e.g. face-to-face, telephone, mail, email</i>                                                                              | Prior selection by clinical team (to establish well enough to participate), approach with PIS by researcher, and "cooling off" period | Methods section p 6-7 |
| 29 |                               |                                       |                                                                                                                                                                 |                                                                                                                                       |                       |
| 30 |                               |                                       |                                                                                                                                                                 |                                                                                                                                       |                       |
| 31 |                               |                                       |                                                                                                                                                                 |                                                                                                                                       |                       |
| 32 |                               |                                       |                                                                                                                                                                 |                                                                                                                                       |                       |
| 33 |                               |                                       |                                                                                                                                                                 |                                                                                                                                       |                       |
| 34 |                               |                                       |                                                                                                                                                                 |                                                                                                                                       |                       |
| 35 | 12                            | Sample size                           | How many participants were in the study?                                                                                                                        | 43, 39 analysed                                                                                                                       | Results section p9    |
| 36 |                               |                                       |                                                                                                                                                                 |                                                                                                                                       |                       |
| 37 |                               |                                       |                                                                                                                                                                 |                                                                                                                                       |                       |
| 38 |                               |                                       |                                                                                                                                                                 |                                                                                                                                       |                       |
| 39 |                               |                                       |                                                                                                                                                                 |                                                                                                                                       |                       |
| 40 |                               |                                       |                                                                                                                                                                 |                                                                                                                                       |                       |
| 41 | 13                            | Non-participation                     | How many people refused to participate or dropped out? Reasons?                                                                                                 | Not recorded                                                                                                                          |                       |
| 42 |                               |                                       |                                                                                                                                                                 |                                                                                                                                       |                       |
| 43 |                               |                                       |                                                                                                                                                                 |                                                                                                                                       |                       |
| 44 |                               |                                       |                                                                                                                                                                 |                                                                                                                                       |                       |
| 45 |                               |                                       |                                                                                                                                                                 |                                                                                                                                       |                       |
| 46 | Setting                       |                                       |                                                                                                                                                                 |                                                                                                                                       |                       |
| 47 |                               |                                       |                                                                                                                                                                 |                                                                                                                                       |                       |
| 48 | 14                            | Setting of data collection            | Where was the data collected? <i>e.g. home, clinic, workplace</i>                                                                                               | On hospital ward (including coronary care unit)                                                                                       | Methods section p6-7  |
| 49 |                               |                                       |                                                                                                                                                                 |                                                                                                                                       |                       |
| 50 |                               |                                       |                                                                                                                                                                 |                                                                                                                                       |                       |
| 51 |                               |                                       |                                                                                                                                                                 |                                                                                                                                       |                       |
| 52 |                               |                                       |                                                                                                                                                                 |                                                                                                                                       |                       |
| 53 | 15                            | Presence of non-participants          | Was anyone else present besides the participants and researchers?                                                                                               | Occasionally patients' relatives stayed during the interview.                                                                         |                       |
| 54 |                               |                                       |                                                                                                                                                                 |                                                                                                                                       |                       |
| 55 |                               |                                       |                                                                                                                                                                 |                                                                                                                                       |                       |
| 56 |                               |                                       |                                                                                                                                                                 |                                                                                                                                       |                       |
| 57 |                               |                                       |                                                                                                                                                                 |                                                                                                                                       |                       |
| 58 |                               |                                       |                                                                                                                                                                 |                                                                                                                                       |                       |
| 59 |                               |                                       |                                                                                                                                                                 |                                                                                                                                       |                       |
| 60 |                               |                                       |                                                                                                                                                                 |                                                                                                                                       |                       |

|                                        |                                |                                                                                          |                                                                   |                                   |
|----------------------------------------|--------------------------------|------------------------------------------------------------------------------------------|-------------------------------------------------------------------|-----------------------------------|
| 16                                     | Description of sample          | What are the important characteristics of the sample? <i>e.g. demographic data, date</i> |                                                                   | Recorded in table 1 of manuscript |
| Data collection                        |                                |                                                                                          |                                                                   |                                   |
| 17                                     | Interview guide                | Were questions, prompts, guides provided by the authors? Was it pilot tested?            | Yes                                                               | Methods section p6-7              |
| 18                                     | Repeat interviews              | Were repeat interviews carried out? If yes, how many?                                    | No                                                                | Methods section p6-7              |
| 19                                     | Audio/visual recording         | Did the research use audio or visual recording to collect the data?                      | Audio-recording                                                   | Methods section p6-7              |
| 20                                     | Field notes                    | Were field notes made during and/or after the interview or focus group?                  | Yes                                                               | Methods section p6-7              |
| 21                                     | Duration                       | What was the duration of the interviews or focus group?                                  | 5-48 minutes                                                      | Results section p9                |
| 22                                     | Data saturation                | Was data saturation discussed?                                                           | Yes                                                               | Results p10                       |
| 23                                     | Transcripts returned           | Were transcripts returned to participants for comment and/or correction?                 | No as no identifiable data was removed from the ward              | See methods p6-7                  |
| <b>Domain 3: analysis and findings</b> |                                |                                                                                          |                                                                   |                                   |
| Data analysis                          |                                |                                                                                          |                                                                   |                                   |
| 24                                     | Number of data coders          | How many data coders coded the data?                                                     | 2                                                                 |                                   |
| 25                                     | Description of the coding tree | Did authors provide a description of the coding tree?                                    | Thematic analysis was recorded as an excel spreadsheet not a tree |                                   |

|           |                              |                                                                                                                                          |                                          |                   |
|-----------|------------------------------|------------------------------------------------------------------------------------------------------------------------------------------|------------------------------------------|-------------------|
| 26        | Derivation of themes         | Were themes identified in advance or derived from the data?                                                                              | Data derived                             | See methods p6-7  |
| 27        | Software                     | What software, if applicable, was used to manage the data?                                                                               | Spreadsheet and word processing software | See methods p8    |
| 28        | Participant checking         | Did participants provide feedback on the findings?                                                                                       | No (see previous comments)               | See methods p6    |
| Reporting |                              |                                                                                                                                          |                                          |                   |
| 29        | Quotations presented         | Were participant quotations presented to illustrate the themes / findings? Was each quotation identified? e.g. <i>participant number</i> | Yes identified by participant number.    | See methods p7    |
| 30        | Data and findings consistent | Was there consistency between the data presented and the findings?                                                                       | Yes                                      |                   |
| 31        | Clarity of major themes      | Were major themes clearly presented in the findings?                                                                                     | Yes                                      | See results p9-18 |
| 32        | Clarity of minor themes      | Is there a description of diverse cases or discussion of minor themes?                                                                   | Yes                                      | See results p9-18 |

# BMJ Open

**“Just like a normal pain”- what do people with diabetes mellitus experience when having a myocardial infarction - a qualitative study recruited from UK hospitals.**

|                                 |                                                                                                                                                                                                                                                                                                                                                                                    |
|---------------------------------|------------------------------------------------------------------------------------------------------------------------------------------------------------------------------------------------------------------------------------------------------------------------------------------------------------------------------------------------------------------------------------|
| Journal:                        | <i>BMJ Open</i>                                                                                                                                                                                                                                                                                                                                                                    |
| Manuscript ID                   | bmjopen-2016-015736.R2                                                                                                                                                                                                                                                                                                                                                             |
| Article Type:                   | Research                                                                                                                                                                                                                                                                                                                                                                           |
| Date Submitted by the Author:   | 02-May-2017                                                                                                                                                                                                                                                                                                                                                                        |
| Complete List of Authors:       | Berman, Nikita; UCL, Research Department of Primary Care and Population Health; Plymouth Hospitals NHS Trust<br>Jones, Melvyn; UCL, Research Department of Primary Care and Population Health; Warden Lodge Surgery,<br>De Coster, Daan; Princess Royal University Hospital, King's College NHS Trust, Bromley, UK; UCL, Research Department of Primary Care and Population Health |
| <b>Primary Subject Heading</b>: | Cardiovascular medicine                                                                                                                                                                                                                                                                                                                                                            |
| Secondary Subject Heading:      | Diabetes and endocrinology, Qualitative research, Emergency medicine, General practice / Family practice                                                                                                                                                                                                                                                                           |
| Keywords:                       | Chest pain, Myocardial infarction < CARDIOLOGY, Diabetic nephropathy & vascular disease < DIABETES & ENDOCRINOLOGY                                                                                                                                                                                                                                                                 |
|                                 |                                                                                                                                                                                                                                                                                                                                                                                    |

SCHOLARONE™  
Manuscripts

Only

1  
2  
3  
4  
5  
6  
7 “Just like a normal pain”- what do people with diabetes mellitus  
8 experience when having a myocardial infarction - a qualitative study  
9 recruited from UK hospitals.  
10  
11  
12  
13  
14  
15  
16  
17  
18  
19  
20  
21  
22  
23  
24  
25  
26  
27

28 Dr Nikita Berman (1) (2), Dr Melvyn M Jones (1), Dr Daan A De Coster (3)  
29  
30  
31  
32  
33

34 Corresponding author: Dr Melvyn Jones ORCID ID 0000-0002-8766-7443  
35 Email: [melvyn.jones@ucl.ac.uk](mailto:melvyn.jones@ucl.ac.uk)  
36  
37  
38

- 39 1. Research Department of Primary Care and Population Health  
40 UCL Medical School, London, UK.  
41
- 42 2. Plymouth Hospitals NHS Trust  
43 Derriford Road, Crownhill, Plymouth, Devon, PL6 8DH, UK  
44
- 45 3. Princess Royal University Hospital Bromley, King's College NHS Trust, UK  
46  
47  
48  
49  
50  
51  
52  
53  
54  
55  
56  
57  
58  
59  
60

## Abstract

**Objective:** The objective of the study was to investigate the symptoms people with diabetes experience when having a myocardial infarction (MI), their illness narrative, and how they present their symptoms to the health service.

**Setting:** Three London (United Kingdom) hospitals- Coronary care units (CCU) and medical wards.

**Participants:** Patients were recruited with diabetes mellitus (DM) (Type 1 & 2) with a clinical presentation of MI (ST elevated myocardial infarction [STEMI], non ST elevated myocardial infarction [NSTEMI], acute MI unspecified & cardiac arrest). 43 participants were recruited, 39 interviews met the study criteria and were analysed. They were predominantly male (n=30), aged 40-90 years and white British (18/39), just over a half were from other ethnic groups. The majority had type II DM (n=35); 24 had an NSTEMI, 10 had an STEMI and 5 had other cardiac events.

**Definitions of selection / exclusion criteria:** a diagnosis of MI, and DM, the ability to communicate enough English to complete the interview. Ward staff made a clinical judgement that the participant was post-treatment, clinically stable and well enough to participate.

**Methods:** A qualitative study utilising taped and transcribed interviews analysed using a thematic analysis.

**Results:** While most participants did experience chest pain, it was often not their most striking symptom. As their chest pain did not match their expectations of what a "heart attack" should be, participants developed narratives to explain these symptoms, including the symptoms being effects of their DM ("hypos"), side effects of medication (oral hypoglycaemics) or symptoms (such as breathlessness and indigestion) related to other comorbidities; often leading to delays in seeking care.

### **Conclusions:**

While truly absent chest pain during MI among people with DM was rare in this study, patients' attenuated symptoms often led to delay in seeking attention, and this may result in delays in receiving treatment.

1  
2  
3 **Data sharing:** - No additional data available.  
4  
5

6 **Article summary**  
7

8 Strengths and weaknesses  
9

10  
11 This is a study of people with diabetes experiencing an MI.  
12

13 Strengths of the study include:  
14

- 15 • contemporaneous patients' descriptions of their symptoms and illness  
16 narrative just after an MI,  
17
- 18 • a model of how attenuated MI symptoms might alter help seeking behaviour,  
19
- 20 • the participants were from a wide demographic background in terms of age,  
21 ethnicity and disease burden.  
22

23  
24 Weaknesses include:  
25

- 26 • by recruiting patients from coronary care units we will not have captured  
27 markedly discrepant presentations,  
28
- 29 • by recruiting on the basis of the ability to communicate in English we will have  
30 lost some cultural and linguistic nuance in symptom presentation.  
31  
32  
33  
34  
35  
36  
37  
38  
39  
40  
41  
42  
43  
44  
45  
46  
47  
48  
49  
50  
51  
52  
53  
54  
55  
56  
57  
58  
59  
60



## Background

Diabetes Mellitus (DM) is a common health problem worldwide and affects 4-6% of the UK population.<sup>1</sup> Cardiovascular disease (CVD) is the major life threatening complication of DM in the UK.<sup>2 3 4</sup> Myocardial infarction (MI) is the prime cause of excess mortality among those with DM, with a 3-fold increased risk of coronary heart disease (CHD) mortality,<sup>5 6</sup> a 6-fold increased risk of myocardial infarction (MI)<sup>7</sup> and a worse prognosis from MI compared with populations without diabetes.<sup>8</sup>

Possible mechanisms of this excess mortality risk include comorbidities such as hypertension, dyslipidaemia and chronic kidney disease. An important element in this observed increased mortality may be late or missed presentation by patients, and diagnosis by clinicians.<sup>9 10 11</sup>

Up to a third of people who suffer an MI can have no chest pain; however people with DM make up a larger proportion of this group (32.6% vs 25.4% in one study).<sup>12</sup> However, when people with DM do have symptoms of an MI, their symptoms may often be atypical<sup>13</sup> or unusual.<sup>14</sup> Nevertheless, there is conflicting evidence around this issue: Funk found no statistically significant difference in CHD symptom presentation in people with and without DM, but did report non-significant increases in dyspnoea, neck and throat pain among those with DM.<sup>15</sup> Kentsch found no differences between these groups in the frequency or severity of chest pain but also identified differences in the prevalence of dyspnoea.<sup>16</sup> One review found conflicting results about differing MI symptoms among women with and without DM.<sup>17</sup>

There are several methodological reasons why these studies may have conflicting results: being underpowered,<sup>18 19</sup> being unrepresentative of the population at risk,<sup>18</sup> or recruited from highly selected hospital populations.<sup>20</sup> Survivor bias (i.e. living to tell the tale of your symptoms) may also be an important issue in a condition such as MI which has a high early mortality.<sup>21</sup>

There is a biological basis for altered perception of pain among people with diabetes in that cardiac autonomic neuropathy (CAN) is a complication of DM and leads to

1  
2  
3 altered pain perception, meaning a patient might not experience pain caused by  
4 myocardial ischaemia.<sup>20</sup>  
5  
6

7 Several qualitative studies have explored patients' symptoms during MI.<sup>22 23 24 25 26</sup>

8  
9 <sup>18</sup> Within the general population experiencing MI, there are several issues identified  
10 including; the considerable psychological impact of pain and specifically cardiac  
11 pain,<sup>27</sup> cardiac symptoms that can be interpreted as pain, but also can trigger  
12 symptoms such as anxiety (both as a trigger and barrier to action) and fear,<sup>28</sup>  
13 producing responses like uncertainty,<sup>29</sup> and denial.<sup>30</sup> Further factors identified  
14 include patients not recognising their symptoms as MI, experiencing vague  
15 symptoms,<sup>31</sup> misattributing their symptoms,<sup>23 24</sup> erroneous expectations of an MI,  
16 <sup>31</sup> and the decisions patients make during their MI.<sup>32</sup> Other factors include delays in  
17 seeking care.<sup>30 11</sup> Theoretical models of delay in seeking treatment specifically in  
18 relation to MI have been summarised by Dracup.<sup>33</sup> Underestimating personal risk of  
19 an MI,<sup>23</sup> and perceived lack of vulnerability to heart disease link to the concept of  
20 "lay epidemiology" and of "coronary candidacy" i.e. not fitting assumptions about the  
21 sort of person who gets a heart attack.<sup>34</sup>  
22  
23  
24  
25  
26  
27  
28  
29  
30

31 There is a role of gender with MI symptoms and its interpretation; work exploring  
32 women's experience of MI symptoms found that women with diabetes had more  
33 atypical and painless MIs than men.<sup>35</sup> In studies of denial among men, there has  
34 been exploration of the impact of their gender roles adversely effecting health  
35 seeking behaviour.<sup>36</sup>  
36  
37  
38  
39

40 In studies specifically exploring the experience of patient with diabetes and MI, many  
41 similar themes emerge. However Angerud finds a variability in the experience of MI  
42 symptoms while exploring the patients' response to symptoms, perceived  
43 susceptibility, and symptom interpretation (but found that MI symptoms were rarely  
44 ascribed to DM).<sup>25</sup> Other studies in this population also identify breathlessness as a  
45 presenting symptom, misinterpretation of symptoms; and their diabetes influencing  
46 patients' decision making during events.<sup>37</sup>  
47  
48  
49  
50  
51

52  
53 Clinician factors  
54  
55  
56  
57  
58  
59  
60

1  
2  
3 The way clinicians ask about chest symptoms may be problematic. Clinicians ask  
4 about “chest pain”, however the term “pain”,<sup>38 39</sup> is often not used by patients  
5 experiencing MI.  
6  
7

8  
9 In the current study, we aimed to address some of the limitations of previous  
10 research by recruiting only DM patients with clear evidence of a recent MI,  
11 regardless of their chest pain presentation, and use of a qualitative methodology to  
12 explore how these patients describe their symptoms. Qualitative methods can help  
13 overcome a narrow clinician focus and help develop a patient orientated view when  
14 exploring symptoms of disease.<sup>37 40 23 41</sup> The aim of the study was to investigate  
15 the symptoms people with diabetes experience when having a myocardial infarction,  
16 their illness narrative, and how they present their symptoms to the health service.  
17  
18  
19  
20  
21  
22  
23  
24  
25  
26  
27  
28  
29  
30  
31  
32  
33  
34  
35  
36  
37  
38  
39  
40  
41  
42  
43  
44  
45  
46  
47  
48  
49  
50  
51  
52  
53  
54  
55  
56  
57  
58  
59  
60

## Methods

This was a qualitative study where interviews were undertaken with patients with DM who have recently had a confirmed MI, recruited within coronary care units (CCU). Eligibility criteria included a confirmed diagnosis of MI (according to AHA criteria <sup>42</sup>), a clinical diagnosis of DM and the ability to communicate (understand and speak) enough English to complete the interview. Clinical staff identified participants and ensured they were post-treatment, clinically stable and well enough to participate. This subjective judgement was made by the clinical staff involved in participants' care as required by the ethics committee. Participants were approached as soon as possible after the diagnosis by a researcher (NB) so we could be sure that they had had an MI (usually a retrospective or working diagnosis) and to minimise recall bias about symptoms. Once invited, they were given a patient information sheet (PIS) about the study and 24 hours to decide whether to participate (see comments regarding ethics approval). The interviews took place in three London, UK hospitals. We aimed to recruit consecutive patients (but this proved unworkable) so this was a pragmatic sample. <sup>43</sup>

The interviews were semi-structured and iterative building from a topic guide to include a narrative of the course, range, character and severity of the symptoms the person experienced before and during their MI. We used a checklist of AMI symptoms based on Funk's acute myocardial infarction (AMI) symptom list. <sup>15</sup> This is distinct to Diamond and Forrester's classification of angina typicality. <sup>44</sup> The checklist was worked through to ensure symptoms were absent and not just omitted. Ideas about expected symptoms of an MI, and symptom attribution were also explored as people often develop complex narratives about their illnesses. <sup>45</sup> We also explored participants' thoughts about their illness, treatments they had attempted, motives and triggers for seeking help, awareness and knowledge of the symptoms of a heart attack.

Interviews were audio recorded, field notes and baseline patient information were noted. Details gathered included the type of MI (ECG changes, troponin level, clinical assessment), the patients' demographics, co-morbidities (type and duration of DM,

1  
2  
3 other disease), risk factors, family history, medication use and information that might  
4 impact on symptom perception, from the informant and their medical records. All  
5 participants were allocated a code number to link their data together and then  
6 anonymised (apart from the consent form) so that identifiable data did not leave the  
7 ward setting.  
8  
9

10  
11  
12 The audio taped interviews were transcribed verbatim and manually analysed using  
13 a thematic framework approach,<sup>22 46</sup> using word processing and spreadsheet  
14 software. Agreement was specifically sought between reviewers about the  
15 classification of symptoms as either typical or atypical as outlined by Funk.<sup>15</sup> Two  
16 independent researchers (NB, DDC) read the transcripts and analysed the data  
17 using the following steps: familiarisation, identifying a thematic framework, indexing,  
18 charting, mapping and interpretation. Throughout this process, transcripts were  
19 repeatedly re-read to focus on specific points and ideas, to verify the presence of the  
20 themes and sub-themes that are identified and ensure the context of the themes has  
21 been preserved. There was then a dialogue between all the researchers which was  
22 reflexive in nature linking the findings back to the study's aims. The analysis was  
23 deductive or theoretical in approach in that we were looking for themes around  
24 diabetes and myocardial infarction, and bounded by an expectation of probable  
25 reduced or absent pain symptomatology and this shaped our topic guide and  
26 approach to the data. However, the analysis was also inductive in nature, in that we  
27 needed to derive themes from the data, in as much that if there were no pain  
28 symptoms during the MI, we needed the participants and their narratives to tell us  
29 what they did experience. The themes around reporting of symptoms is semantic  
30 (or a surface meaning) in that we are largely reporting the participants' descriptions  
31 of their experience. However, the explanatory models around what participants  
32 thought caused their symptoms and reactions to those symptom is a much more  
33 latent thematic or interpretive analysis.<sup>22</sup> Representative quotes (with consent)  
34 were used and have identifying details to link the theme to the participants'  
35 characteristics.  
36  
37  
38  
39  
40  
41  
42  
43  
44  
45  
46  
47  
48  
49  
50  
51

52  
53 The lay term "heart attack" is used extensively in the transcripts; this can have a  
54 broad popular meaning but we will assume is used by participants to suggest a  
55 myocardial infarction.  
56  
57  
58  
59  
60

1  
2  
3 Ethical approval for this study and the use of quotes was obtained from the  
4 Hertfordshire Research Ethics Committee. (Project no: 11/EE/0045). The committee  
5 requested that we allowed a “cool off” period of 24 hours from approach to obtaining  
6 consent. Data protection and local hospital trust R&D policies were followed.  
7  
8 Consent was not originally sought to disclose the full interview transcripts.  
9  
10

### 11 Patient involvement

12  
13  
14 The original idea for this study was based on a clinical encounter in general practice.  
15 A patient consulted MJ his GP, having suffered a severe MI despite having minimal  
16 symptoms and subsequently developed severe heart failure. Before his death, this  
17 patient agreed to support research in this area and filmed a brief video of his  
18 experiences. A broader study (with same research question but a different  
19 methodology) on this field was presented and supported by the North East London  
20 Diabetes Research Network Lay Panel Meeting in 2011. Patients’ narratives  
21 constitute the data underlying this study.  
22  
23  
24  
25  
26  
27  
28  
29  
30  
31  
32  
33  
34  
35  
36  
37  
38  
39  
40  
41  
42  
43  
44  
45  
46  
47  
48  
49  
50  
51  
52  
53  
54  
55  
56  
57  
58  
59  
60

## Results

Forty three participants were recruited from the participating hospitals, however 4 interviews proved unusable due to not meeting study recruitment criteria on detailed case review and were excluded, resulting in a total of 39 participants' data available for analysis. The interviews had a mean duration of 20mins 33 sec (with a range of 5 mins 14 secs to 48mins 46 secs) and were all undertaken by one interviewer; NB. The study comprised of 30 men and 9 women; with an age range of 40-90, 35 participants had type 2 DM and 4 had type 1 DM. All participants had confirmed acute coronary syndrome; 24 had NSTEMIs, 10 had STEMIs and 5 had other MIs (acute MI-unspecified including 4 cardiac arrests). Their ethnic categories were White British (n=18), Asian/ south Asian (n=7), African or Afro-Caribbean (n=3) and others (n=5) e.g. Turkish, Maltese etc. A number (n=6) declined to state their ethnicity or instead identified their religious affiliation e.g. "Church of England", "Jewish" etc. One interview was done via an informal family translator but frequently family members would participate in the interview, clarifying the order of events or reminding the participant about elements of their illness narrative (which may have been clouded by their illness including cardiac arrest or treatment such as strong opioid analgesics). Participants were usually approached to participate the day following admission, or the Monday following a weekend admission and then interviewed usually the following day after consenting to participate as per our ethics approval. Data saturation was achieved. Each participant was given a study number between 1 to 43 and quotes are linked e.g. participant 22 (P22)

## Themes

The analysis of the data led to the identification of the following themes and sub themes.

### Symptoms

- Typical vs atypical presentations
  - Atypical presentations
- Absence of pain

### Attribution and consequences

- Attributing symptoms to co-morbidities
  - Ascribing symptoms to DM
  - Ascribing symptoms to hypoglycaemia
- Delay in seeking help
- Gradual onset of symptoms
  - Multiple symptoms
- Lack of awareness of MI symptoms or their increased risk of MI
  - Experience of repeat MIs
- Language of pain
- Knowing “something was wrong”

However, these themes are not distinct. The nature of obtaining patients’ narratives means that there are complex, inseparable relationships in concepts and ideas, with a continuum across themes and subthemes.

### Symptoms



1  
2  
3 Participants described a wide range of symptoms, primarily around chest pain and  
4 discomfort. However, other symptoms associated with MI such as sweating and  
5 breathlessness were described, as well as a series of symptoms that are not usually  
6 associated with MI presentations. With regard to chest pain, we found a range of  
7 symptom presentations.  
8  
9

### 10 11 Typical versus atypical presentations.

12  
13 Chest pain of a specific character is regarded as the classic symptom of MI and was  
14 present in most of these interviews;  
15  
16

17  
18 *“It was like your chest was being crushed.” (P3)*  
19

20  
21 Many of these descriptions catch this essence of a typical MI;  
22

23  
24 *“Err a real dull ache and like someone is screwing up, like a tight chest just  
25 really tight, like someone is squeezing it inside....yeah like a really, really dull  
26 pain”... “it started hurting and made me feel really ill ...but then I went really  
27 pale & started sweating .. absolutely saturated.. just a really tight chest and  
28 sore like, as if there was a weight directly on top of me”. (P 11)*  
29  
30  
31

32  
33 Most of those in the study experienced some typical symptoms. However, typical  
34 symptoms with a recent chronology (necessary to suspect MI) was not always  
35 present or immediately apparent in the interviews.  
36  
37

38  
39 Some experienced sweating; regarded as a typical MI symptom;  
40

41  
42 *“My night clothes were soaking wet.” (P3).*  
43

44  
45 Breathlessness was also experienced either with pain or separately, which although  
46 classed as a “typical” symptom [23], is not generally recognised by clinicians to be  
47 suggestive of an MI;  
48

49  
50 *“I can’t breathe, you couldn’t breathe, my wife she phone a medic ... No you  
51 got the pain and you can’t breathe...you think you’re gonna die for the lack of  
52 breath”, (P14)*  
53

54  
55 *“Like somebody’s pushing me...and I’m short of breath and then it was getting  
56 worse and it start burning”. (P35)*  
57  
58  
59  
60

### Atypical pain

Some of those in this study sometimes narrated their experience of a diffuse and ambiguous set of symptoms that may not raise suspicion of MI;

*"It feels like something crawling up my arm... and it bites deep in there...the only way I can describe it, it feels like someone is in there with claws and they're tearing at your inside. Just screaming and pulling at it. Very, very strange pain indeed", (P24)*

although this person later describes quite typical sounding symptoms. Others described the quality of their pain;

*"It was just sticking pain, it was just a really pain, stay there for about 3 hours", (P30)*

*"Like a normal pain, it wasn't a pain, actually it was dull". (P26)*

These quotes raise the issue of participants' use of language which is discussed later.

The following quote illustrates a mixture of some typical and atypical symptoms;

*"I can feel something happening you know, my chest, had very bad pain in my arm, my neck and my leg, I couldn't move... Yeah sharp pain, very sharp ...Somebody was pressing my, you know, chest...My back... All the way up to the waist...I couldn't breathe you know. I get very deep breath, I tried to do it but it didn't go, somebody was choking me". (P5)*

The inseparability of these two types of symptoms (typical/ atypical) is raised in the discussion.

Symptoms of weakness and tiredness were also reported around the timing of the MI. One participant could not walk and said;

*"It's just the sheer um lethargy really, I just couldn't do anything...I wasn't giddy and I wasn't in a lot of pain, I just couldn't sort of come to, I was, I couldn't put one foot in front of the other. I was just so weak". (P10)*

### Absence of pain

1  
2  
3 Some clearly stated they had no chest pain;

4  
5 *“Nothing, nothing, no discomfort, no pain” (pre cardiac arrest), (P27)*

6  
7  
8 but this participant did have pain after being resuscitated. Another reported;

9  
10 *“No pain, no sweating, nothing else” (pre cardiac arrest). (P23)*

11  
12 Both of these participants experienced cardiac arrests, so some degree of event  
13 amnesia cannot be excluded.

### 14 15 16 17 Attribution and consequences

#### 18 19 Attributing symptoms to co-morbidities

20  
21 The participants seemed to rationalise their symptoms and find a reason to dismiss  
22 that the cause of their symptoms could be a “heart attack”. Many attributed their  
23 symptoms to other illness and causes. Most commonly, they attributed their  
24 symptoms to other illness and causes. Most commonly, they attributed their  
25 symptoms to indigestion leading to self-medication with antacids for this;

26  
27  
28  
29 *“when you feel bloated and gassy and it’s similar to that sort of pain. That’s*  
30 *why I mistook it for being indigestion.... I put it down to nerves or exercise*  
31 *...but then in the early hours of Sunday morning I realised it couldn’t have*  
32 *been indigestion because it was paining me a great deal”, (P31)*

33  
34  
35  
36  
37 *“I took, bicarb of soda, didn’t work. I took um Gaviscon (antacid remedy),*  
38 *didn’t work. The antibiotics didn’t work. That’s when I knew, there was more to*  
39 *this”. (P3)*

40  
41  
42 but symptoms were also attributed to other causes that included asthma, muscular  
43 aches, panic attacks, stress and importantly in this group, their DM;

44  
45  
46  
47 *“Because of, I have other illness(es), like blood pressure, diabetes, I didn’t think*  
48 *(of MI), because I thought there is nothing wrong with my heart.” (P4).*

49  
50 These quotes also link to the theme of delay (both by patient and clinician in this  
51 instance) which is discussed further on.

#### 52 53 54 55 Ascribing symptoms to DM

1  
2  
3 Participants sometimes specifically attributed their symptoms to (lack) of control of  
4 their DM, symptoms of DM or side effects of their medication;  
5  
6

7 *"I didn't realise I was having heart attack, so I was feeling rotten ...I was*  
8 *hungry. Well I wasn't really hungry but I know, don't, diabetic, ...that's when*  
9 *the pain come, and I went to bed and it woke me up around 2 in the morning",*  
10 *(P17)*  
11  
12

13  
14 *"Well dizzy, tired, again I'm dizzy all the time with diabetes, you get that, that's*  
15 *part and parcel of being diabetic". (P17)*  
16  
17

18  
19 Participant 3 also attributed her dizziness during her MI to her DM;  
20

21 *"Not fainting, but you know dizzy turns, because I do get these dizzy turns.*  
22 *You see, this is all in with the diabetes you see". (P3)*  
23  
24

#### 25 Ascribing symptoms to hypoglycaemia

  
26

27  
28 Patients when experiencing some symptoms, particularly sweating and feeling  
29 unwell perceived themselves to be experiencing hypoglycaemia ("Hypo"), for  
30 example;  
31  
32

33 *"because I am diabetic, right, um, I thought, initially I thought it was um low*  
34 *blood sugar", (P2.)*  
35  
36

37 *"A little (of sweating) bit, but ...I didn't have my testing gear with me & I*  
38 *thought that it might be a hypo at the time". (P11)*  
39  
40

41  
42 Participant 3 perceived herself to be experiencing hypoglycaemia;  
43

44 *"That's when I knew, there was more to this (symptoms) and I had, I don't*  
45 *know whether I had five hypo's in that week, but I was rolling all over the*  
46 *place". (P3).*  
47  
48

#### 49 Delay in seeking help

  
50

51  
52 Delay in help seeking was a prominent feature in these narratives;  
53  
54

55 *"I think to be honest it (chest pain) came on suddenly but I tended to ignore it,*  
56 *I've got one more screw to put in", (P21)*  
57  
58  
59  
60

1  
2  
3 *"I waited till my GP opened in the morning. I called him and I told him what's*  
4 *wrong, they said 'just phone the ambulance' ". (P5).*  
5  
6

7 This delay could be ascribed to participants' failure to attribute symptoms to MI,  
8 attribution to co-morbidities, lack of symptom awareness or lack of awareness of  
9 increased risk of MI; but participants often realised that something more serious was  
10 occurring when their symptoms did not improve;  
11  
12

13  
14 *"But it was there too long, so I said 'could be heart attack' ". (P30)*  
15

16  
17 Often participants had dismissed or explained away these one off or minor  
18 symptoms and did not think much of them, except with hindsight;  
19

20  
21 *"more during the week. Nothing sharp... it was just a niggling thing, it just*  
22 *came and then it went away ... you just didn't think too much of any of these*  
23 *factors in isolation; but together". (P31)*  
24  
25

26  
27 With others, denial was behind their delay;  
28

29 *"Well I thought it was a heart attack but I didn't really want to admit it at the*  
30 *time. Anything other than a heart attack". (P17)*  
31  
32

### 33 34 35 36 Gradual onset of symptoms

37  
38 For some participants part of this delay was the gradual rather than sudden onset of  
39 symptoms;  
40  
41

42 *"Well no ...it had happened a fortnight before"... "Sat in the chair for about*  
43 *20mins and then it went so then I said to my wife, I told her 'If it happens*  
44 *again I would be calling the doctor' ". (P20)*  
45  
46  
47

### 48 Multiple symptoms

49  
50 The respondents often had complex narratives where chest pain was a part of the  
51 symptom complex they described, but their chest pain symptom may not have been  
52 the most prominent, important or distressing feature; exemplified by the following  
53 quote;  
54  
55  
56  
57  
58  
59  
60

1  
2  
3 *"It (chest pain) did come on suddenly ...at the same time I had this very heavy*  
4 *perspiration...& this very uncomfortable tummy ache...Err all three things*  
5 *hitting me at once; you don't pick one out in particular ...all those three factors*  
6 *the er tummy ache the excessive err sweating and the pain in the chest um I*  
7 *could point to one and say look that was the main problem.. they were all a*  
8 *problem at that short period of time". (P 25)*  
9  
10  
11  
12

### 13 14 15 16 Lack of awareness of MI symptoms or their increased risk of MI

17  
18 Many of these respondents, despite having long standing diabetes, previous cardiac  
19 events or a strong family history, seemed unaware that they were at a high risk of  
20 subsequent MI;  
21  
22

23  
24  
25 *"I thought ...how can I have a heart attack? Right. But you see, this might be*  
26 *relevant as well; both my side of my family, my mother's side and my father's*  
27 *side are diabetic. My father had a heart attack as well and he died from it. My*  
28 *mother had a triple heart bypass. My elder brother's had an angioplasty, right,*  
29 *so it does run in the family" (P2)*  
30  
31  
32

### 33 34 Experiences of a repeat MI

35  
36 Participants who had previous MIs might be expected to have a good working  
37 knowledge of these symptoms and respond accordingly if it recurred. We found  
38 however that often they did not do so;  
39  
40

41  
42 *"I should have guessed, right, um, it's exactly the same symptoms as when I*  
43 *had my first heart attack". (P2)*  
44  
45

### 46 Language of pain

47  
48 The expectation of severe chest pain is key to many patients' and doctors' model of  
49 what an MI should be like and is apparent in some of the previous themes. However,  
50 many of these respondents had symptoms that they didn't feel reached a threshold  
51 of severity that they would call "pain";  
52  
53  
54

55  
56 *"I suppose people would call it a pain, I don't know, I wouldn't, I would still call*  
57 *it severe discomfort...dull, rather than, no it wasn't sharp.... I won't put it (pain*  
58  
59  
60

1  
2  
3 severity score) higher, otherwise I probably would have called an ambulance  
4 straight away”, (P20)  
5  
6

7 “No, it was a constant. When I say pain, ache, it wasn’t a pain that was  
8 making me double up or anything”. (P25)  
9

10  
11 While some struggled to conceptualise their symptoms as pain, others struggled to  
12 use words to describe their symptoms;  
13

14  
15 *“It’s so difficult cos it was more uncomfortable than a pain that you can  
16 describe ... I don’t know how to describe it”. (P20)*  
17  
18

19 While others clearly had very significant pain but still struggled to articulate it;  
20

21  
22 *“Indescribable to me, I couldn’t, as I sit here I can’t describe it... I had severe  
23 pain and it was; I don’t know how you break it down into words”. (P19)*  
24  
25

#### 26 Knowing “something is wrong”

27

28 Frequently participants had a “gut feeling” that there was something wrong or a  
29 strong emotional response to their symptoms;  
30  
31

32  
33 *“You know, I could sort of feel that there was something wrong”, (P2).*  
34

35 *“And I thought I can’t do this, I got to get ‘elp, and that’s when I dialled 999...  
36 and, you know, everything was going wrong, and I just couldn’t figure out”.  
37 (P3).*  
38  
39

40 A “sense of doom” is often associated with the presentation of MI, but in this group  
41 only a few participants reported a strong sense of impending death;  
42  
43  
44

45 *“I felt as if I was going to die (anxious voice)”. (P6)*  
46  
47  
48  
49  
50  
51  
52  
53  
54  
55  
56  
57  
58  
59  
60

## Discussion

We found that patients with DM who experienced an MI exhibited a wide range of symptoms from very classical presentations to very mild symptoms.<sup>23</sup> Patients often were unclear what caused their symptoms.<sup>47</sup> This diagnostic confusion or uncertainty appears periodically to have been mirrored by clinicians.<sup>9 24</sup>

The symptoms experienced in this group ranged from those that may be expected by health care professionals, to more atypical symptoms with patients using unusual descriptive terms. The variation in experiences highlights the difficulty for both patients and healthcare providers to correctly attribute these symptoms to a cardiac event.

Patients with DM will often have other significant co-morbidities which can be attributed to their symptoms e.g. breathlessness from chronic obstructive pulmonary disease (COPD) rather than an MI. However, there seems to be an important area of confusion from symptoms related to DM and its control, that can lead to a misattribution of pain symptoms away from a new onset MI. A specific issue among this group is the impact of MI symptoms which were perceived as a side effect of medication (particularly insulin and oral hypoglycaemics). Interpreting episodes of hypoglycaemia and sudden onset MI seems to be particularly challenging with an overlap of many similar symptoms and their sudden onset.<sup>25</sup>

We found participants had a lack of knowledge of MI symptoms, were falsely reassured by the lack of severe pain or did not conceptualise their milder chest discomfort as chest pain. These factors may all lead to denial or confusion and therefore delay in seeking care.<sup>33</sup> Delay in seeking medical attention during an MI, will have significant prognostic implications.

As the participants' symptoms did not fit with their preconceived ideas of an MI,<sup>25</sup> they ascribed it to other less serious causes, or importantly attributed their symptoms to their DM, medication side effects or "hypos"; which is a novel and important finding. The attenuated chest pain competing with other, perhaps more distressing symptoms and so being "crowded out" from the illness cognition of a possible MI, has not been previously reported.



### Strengths

Within this study we have reported contemporaneous symptoms from a well described patient group, who can be characterised by their MI diagnosis. We have captured a wide range of participants with MI, by using biochemical confirmation of diagnosis wherever possible, but also by including clinical diagnoses (e.g. for cardiac arrests). Unusually for a qualitative study we have a relatively large number of participants, who were interviewed as early as possible (or allowed to) after the event to reduce recall bias.<sup>48</sup>

### Limitations

Despite recruiting participants on the basis of their MI diagnosis, but not specifically on chest pain presentations, participants are likely to have initially volunteered chest pain symptoms to get admitted to a coronary care unit. Markedly discrepant MI narratives are less likely to be represented in this study, as are silent MIs, as they are more likely to go unrecognised and present late. Survivor bias is also a distinct possibility.<sup>21</sup> While a study size of 39 is good for qualitative research,<sup>48</sup> it is small in comparison with epidemiological studies so this methodology is therefore unlikely to pick up rarer presentations of MI.

Recruiting on the basis of being able to converse in English will exclude the linguistic nuance of other languages and cultures; important when south Asian populations among others, have a high risk of DM and coronary heart disease. However, we did successfully capture many patients who had English as second language. Additionally the UK NHS struggles to provide reliable, accessible translation; particularly in the acute and out of hours setting, so our findings may more faithfully reflect the real world setting of these decisions and presentations.

Truncating these interviews into quotes also runs the danger of falsely dichotomising symptoms into “typical” and “atypical”. When the transcripts are read in full and in context, a more rounded picture of the event develops. This nuanced view is probably a key element that helps experienced clinicians successfully identify a potential MI, in this group of patients.

### How this fits into existing literature

The findings of our study link with previous work within a broad context of psychological models of illness behaviour such as health belief models.<sup>49</sup> We have used our findings to adapt Rosenstock and Kirsch's health belief model<sup>49</sup> (see figure 1) so that the impact of DM can modify the steps in the model such as reduced pain from neuropathy during an MI reducing the likelihood of action.

Diagram here (figure 1)

The language of describing pain and particularly the difficulty of describing pain recurs within our sample. Scarry describes this as the "inexpressibility of pain"<sup>50</sup> and this is seen with some respondents. Others use metaphor and simile to circumvent this issue, which may be helpful to the patient but means a clinician might cognitively process such symptom descriptions as "atypical" or "non cardiac", leading to misdiagnosis and delays in treatment. The term "chest pain" is also problematic<sup>38</sup>; many of these participants did not conceptualise their chest symptoms as pain and so, Miller has suggested using the term "chest sensation" instead.<sup>51</sup>

Our findings have some similarities to other studies about patients' experiences of MI.<sup>23 24 25 26</sup> The similarity of symptom presentation raises the possibility that these studies are just capturing the heterogeneous array of MI symptoms and this is unlinked to any underlying physiological or pathological process such as gender or DM. However, our finding of patient misattribution of MI symptoms to DM and diabetic medication, in a group at high risk of MI, does have significant clinical implications for patients and clinicians.

### Implications for further research

Despite knowing that people with DM are at much higher risk of coronary events we fail to inform patients in the UK about their increased cardio-vascular risk nor identify early those who may be developing such problems. Whether screening people with diabetes for ischaemic heart disease would be beneficial remains a key question. Possibilities include trialling patient education about their CHD risk and its

1  
2  
3 presentation in the UK Quality and Outcome (QOF) DM check or including this  
4 information within DESMOND (desmond-project.org.uk)/DAFNE ([www.dafne.uk.com](http://www.dafne.uk.com))  
5 patient education programmes, but there would be considerable difficulty in  
6 designing an educational package that could reliably help patients distinguish  
7 between these two aetiological possibilities of “hypo” versus MI.  
8  
9

### 10 Implications for practice

11  
12 This study could contribute towards increased awareness of MI in those with DM.  
13 Patients with DM should be made aware of their increased risk of cardiac events,  
14 how they present and how they differ from medication side effects and “hypos”.  
15 Clinicians should carefully explore patients with diabetes and their symptoms as well  
16 as their interpretation of their symptoms.  
17  
18  
19  
20  
21  
22

#### 23 a. Contributorship statement

24 All 3 authors fulfil all three of the ICMJE guidelines for authorship, MJ had the  
25 original study conception and design and then supervised NB during her iBSc  
26 project. NB collected all the data. NB and DDC analysed the final data set. MJ  
27 wrote the final manuscript with substantial intellectual input from NB and DDC.  
28 All authors approved the final manuscript.  
29  
30  
31  
32

#### 33 b. Competing interests

34 None  
35

#### 36 c. Funding

37 Royal College of General Practitioners’ Scientific foundation board (grant SFB  
38 2011-25). The original project was part of the UCL iBSc in primary health care  
39 and formed NB’s dissertation, supervised by MJ.  
40  
41  
42  
43

#### 44 d. Data sharing statement

45 No additional data are available as participants only consented to quotes  
46 being published.  
47  
48

### 49 Figure legend

50  
51 Figure 1: How diabetes (grey boxes) might affect the “Health Belief model” during  
52 MI  
53  
54

55 With permission from Fig 1. page 115 (adapted) from Victor J. Strecher and Irwin  
56 M. Rosenstock, “The health belief model”, Andrew Baum, Stanton Newman, John  
57 Weinman, Robert West, Chris McManus (eds.), (1997), “Cambridge Handbook of  
58  
59  
60

Psychology, Health and Medicine, 9780521436861, Cambridge : Cambridge University

#### Reference List

1. González ELM, Johansson S, Wallander MA, et al. Trends in the prevalence and incidence of diabetes in the UK: 1996 to 2005. *Journal of Epidemiology and Community Health* 2009;**63**(4):332-36.
2. Wannamethee SG, Shaper AG, Lennon L. Cardiovascular disease incidence and mortality in older men with diabetes and in men with coronary heart disease. *Heart* 2004;**90**(12):1398-403.
3. Shah AD, Langenberg C, Rapsomaniki E, et al. Type 2 diabetes and incidence of cardiovascular diseases: a cohort study in 1.9 million people. *The Lancet Diabetes & Endocrinology* 2015;**3**(2):105-13.
4. . The Emerging Risk Factors Collaboration. Diabetes Mellitus, Fasting Glucose, and Risk of Cause-Specific Death. *New England Journal of Medicine* 2011;**364**(9):829-41.
5. Huxley R, Barzi F, Woodward M. Excess risk of fatal coronary heart disease associated with diabetes in men and women: meta-analysis of 37 prospective cohort studies. *BMJ* 2006;**332**(7533):73-78.
6. Stamler J, Vaccaro O, Neaton JD, et al. Diabetes, other risk factors, and 12-yr cardiovascular mortality for men screened in the Multiple Risk Factor Intervention Trial. *Diabetes Care* 1993;**16**(2):434-44.
7. Haffner SM, Lehto S, Ronnema T, et al. Mortality from Coronary Heart Disease in Subjects with Type 2 Diabetes and in Nondiabetic Subjects with and without Prior Myocardial Infarction. *The New England Journal of Medicine* 1998;**339**(4):229-34.
8. Brophy S, Cooksey R, Gravenor M, et al. Population based absolute and relative survival to 1 year of people with diabetes following a myocardial infarction: A cohort study using hospital admissions data. *BMC Public Health* 2010;**10**(1):338.
9. Sequist TD, Marshall R, Lampert S, et al. Missed opportunities in the primary care management of early acute ischemic heart disease. *Archives of Internal Medicine* 2006;**166**(20):2237-43.
10. Asaria P, Elliott P, Douglass M, et al. Acute myocardial infarction hospital admissions and deaths in England: a national follow-back and follow-forward record-linkage study. *The Lancet Public Health*;2017. 10.1016/S2468-2667(17)30032-4.
11. Ångerud KH, Brulin C, Näslund U, et al. Longer pre-hospital delay in first myocardial infarction among patients with diabetes: an analysis of 4266 patients in the Northern Sweden MONICA Study. *BMC Cardiovascular Disorders* 2013;**13**(1):6.
12. Canto JG, Shlipak MG, Rogers W.J., Malmgren JA, Frederick PD, Lambrew CT, Ornato JP, Barron HV, Kiefe C.I. Prevalence, clinical characteristics, and mortality among patients with myocardial infarction presenting without chest pain. *JAMA* 2000;**283**(24):3223-29.
13. Brieger D, Eagle KA, Goodman SG, et al. Acute Coronary Syndromes Without Chest Pain, An Underdiagnosed and Undertreated High-Risk Group: Insights From The Global Registry of Acute Coronary Events. *Chest* 2004;**126**(2):461-69.
14. Arslanian-Engoren C, Patel A, Fang J, et al. Symptoms of Men and Women Presenting With Acute Coronary Syndromes. *The American Journal of Cardiology* 2006;**98**(9):1177-81.

15. Funk M, Naum JB, Milner KA, et al. Presentation and symptom predictors of coronary heart disease in patients with and without diabetes. *AmJ EmergMed* 2001;**19**(6):482-87.
16. Kentsch M RU, Gitt AK, Schiele R, Wienbergen H, Schubert J, Muller-Esch G, Ittel TH, Mitusch R, Tschoepe D, Senges J. Angina intensity is not different in diabetic and non-diabetic patients with acute myocardial infarction. *Zeitschrift fur Kardiologie* 2003;**92**(10):817-24.
17. Stephen SA, Darney BG, Rosenfeld AG. Symptoms of acute coronary syndrome in women with diabetes: An integrative review of the literature. *Heart & Lung: The Journal of Acute and Critical Care* 2005;**37**(3):179-89.
18. DeVon HA, Penckofer SM, Zerwic JJ. Symptoms of unstable angina in patients with and without diabetes. *ResNursHealth* 2005;**28**(2):136-43.
19. Richman PB, Brogan GX, Nashed AN, et al. Clinical Characteristics of Diabetic vs Nondiabetic Patients Who "Rule-in" for Acute Myocardial Infarction. *Academic Emergency Medicine* 1999;**6**(7):719-23.
20. Airaksinen KE, Koistinen MJ. Association between silent coronary artery disease, diabetes, and autonomic neuropathy. Fact of fallacy? *Diabetes Care* 1992;**15**(2):288-92.
21. Saracci R. Survival-related biases survive well. *International Journal of Epidemiology* 2007;**36**(1):244-46.
22. Braun V, Clarke V. What can "thematic analysis" offer health and wellbeing researchers? *International Journal of Qualitative Studies on Health and Well-being*; Vol 9 (2014) 2014.
23. Lichtman JH, Leifheit-Limson EC, Watanabe E, et al. Symptom Recognition and Healthcare Experiences of Young Women With Acute Myocardial Infarction. *Circulation: Cardiovascular Quality and Outcomes* 2015;**8**(2 suppl 1):S31-S38.
24. Coventry LL, van Schalkwyk JW, Thompson P, et al. Myocardial infarction, patient decision delay and help seeking behaviour: a thematic analysis. *Journal of Clinical Nursing* 2016:DOI: 10.1111/jocn.13607.
25. Ängerud KH, Brulin C, Eliasson M, et al. The Process of Care-seeking for Myocardial Infarction Among Patients With Diabetes. *The Journal of Cardiovascular Nursing* 2015;**30**(5):E1-E8.
26. DeVon HA, Hogan N, Ochs AL, et al. Time to Treatment for Acute Coronary Syndromes: The Cost of Indecision. *Journal of Cardiovascular Nursing* 2010;**25**(2):106-14.
27. MacDermott AF. Living with angina pectoris--a phenomenological study. *Eur J CardiovascNurs* 2002;**1**(4):265-72.
28. Tod AM, Read C, Lacey A, et al. Barriers to uptake of services for coronary heart disease: qualitative study. *BMJ* 2001;**323**(7306):214.
29. Fitzsimons D, Parahoo K, Richardson SG, et al. Patient anxiety while on a waiting list for coronary artery bypass surgery: a qualitative and quantitative analysis. *Heart Lung* 2003;**32**(1):23-31.
30. Johansson I, Swahn E, Strömberg A. Manageability, vulnerability and interaction: A qualitative analysis of acute myocardial infarction patients' conceptions of the event. *European Journal of Cardiovascular Nursing* 2007;**6**(3):184-91.
31. Nymark C, Mattiasson A-C, Henriksson P, et al. The turning point: from self-regulative illness behaviour to care-seeking in patients with an acute myocardial infarction. *Journal of Clinical Nursing* 2009;**18**(23):3358-65.
32. Pattenden J, Watt I, Lewin RJP, et al. Decision making processes in people with symptoms of acute myocardial infarction: qualitative study. *BMJ* 2002;**324**(7344):1006.
33. Dracup K, Moser DK, Eisenberg M, et al. Causes of delay in seeking treatment for heart attack symptoms. *Social Science & Medicine* 1995;**40**(3):379-92.
34. Emslie C, Hunt K, Watt G. "I'd rather go with a heart attack than drag on": lay images of heart disease and the problems they present for primary and secondary prevention. *Coronary Health Care* 2001;**5**:25-32.

- 1
- 2
- 3 35. Stephen SA, Darney BG, Rosenfeld AG. Symptoms of acute coronary syndrome in women with
- 4 diabetes: An integrative review of the literature. *Heart & Lung: The Journal of Acute and*
- 5 *Critical Care* 2008;**37**(3):179-89.
- 6
- 7 36. White AK, Johnson M. Men making sense of their chest pain--niggles, doubts and denials. *J Clin*
- 8 *Nurs* 2000;**9**(4):534-41.
- 9
- 10 37. Mayer D D.; Rosenfeld A. Symptom interpretation in women with diabetes and myocardial
- 11 infarction: a qualitative study. *Diabetes Educator* 2006;**32**(6):918-24.
- 12
- 13 38. Treasure T. Pain is not the only feature of heart attack. *BMJ* 1998;**317**:602.
- 14
- 15 39. Albarran JW, Clarke BA, Crawford J. 'It was not chest pain really, I can't explain it!' An exploratory
- 16 study on the nature of symptoms experienced by women during their myocardial infarction.
- 17 *J Clin Nurs* 2007;**16**(7):1292-301.
- 18
- 19 40. Farmer SA, Higginson IJ. Chest Pain: Physician Perceptions and Decision making in a London
- 20 Emergency Department. *Annals of Emergency Medicine* 2006;**48**(1):77-85.
- 21
- 22 41. Jones MM, Somerville C, Feder G, et al. Patients' descriptions of angina symptoms: a qualitative
- 23 study of primary care patients. *BrJGenPract* 2010;**60**:735-41.
- 24
- 25 42. Thygesen K, Alpert JS, White HD, et al. Universal Definition of Myocardial Infarction. *Circulation*
- 26 2007;**116**(22):2634-53.
- 27
- 28 43. Emmel N. *Sampling and choosing cases in qualitative research: a realist approach*. London 2013:
- 29 Sage.
- 30
- 31 44. Diamond GA, Forrester JS. Analysis of probability as an aid in the clinical diagnosis of coronary-
- 32 artery disease. *NEngJ Med* 1979;**300**(24):1350-58.
- 33
- 34 45. Kleinman A. *The illness narratives: Suffering, healing, and the human condition*: Basic books,
- 35 1988.
- 36
- 37 46. Ritchie J, Spencer E. *Qualitative data analysis for applied policy research*. London: Routledge,
- 38 1994.
- 39
- 40 47. Kirchberger I, Heier M, Wende R, et al. The patient's interpretation of myocardial infarction
- 41 symptoms and its role in the decision process to seek treatment: the MONICA/KORA
- 42 Myocardial Infarction Registry. *Clinical Research in Cardiology* 2012;**101**(11):909-16.
- 43
- 44 48. Baker SE, Edwards R. How many qualitative interviews is enough? Expert voices and early career
- 45 reflections on sampling and cases in qualitative research. Secondary How many qualitative
- 46 interviews is enough? Expert voices and early career reflections on sampling and cases in
- 47 qualitative research 2012. [http://eprints.ncrm.ac.uk/2273/4/how\\_many\\_interviews.pdf](http://eprints.ncrm.ac.uk/2273/4/how_many_interviews.pdf)
- 48
- 49 49. Strecher VJ, Rosenstock IM. The health belief model. *Cambridge handbook of psychology, health*
- 50 *and medicine* 1997:113-17.
- 51
- 52 50. Scarry E. *The body in pain*. New York: Oxford University Press, 1985.
- 53
- 54 51. Miller CL. Symptom reflections of women with cardiac disease and advanced practice nurses: a
- 55 descriptive study. *ProgCardiovascNurs* 2003;**18**(2):69-76.
- 56
- 57
- 58
- 59
- 60

1  
2  
3  
4  
5  
6  
7  
8  
9  
10  
11  
12  
13  
14  
15  
16  
17  
18  
19  
20  
21  
22  
23  
24  
25  
26  
27  
28  
29  
30  
31  
32  
33  
34  
35  
36  
37  
38  
39  
40  
41  
42  
43  
44  
45  
46  
47  
48  
49  
50  
51  
52  
53  
54  
55  
56  
57  
58  
59  
60

Figure 1: How diabetes (grey boxes) might affect the "Health Belief model" during MI  
 With permission from Fig 1, page 115 (adapted) from Victor J. Strecher and Irwin M. Rosenstock, "The health belief model", Andrew Baum, Stanton Newman, John Weinmar, Robert West, Chris McManus (eds.), (1997), "Cambridge Handbook of Psychology, Health and Medicine, 9780521436861, Cambridge : Cambridge University



Figure 1- How diabetes (grey boxes) might effect the health belief model during MI

296x419mm (300 x 300 DPI)

|                                                        | Item                                           | Guide questions/description                                                                                                                                       | Author completed                                                                                      | Location                                                         |
|--------------------------------------------------------|------------------------------------------------|-------------------------------------------------------------------------------------------------------------------------------------------------------------------|-------------------------------------------------------------------------------------------------------|------------------------------------------------------------------|
| <b>Domain 1:<br/>Research team<br/>and reflexivity</b> |                                                |                                                                                                                                                                   |                                                                                                       |                                                                  |
| Personal<br>Characteristics                            |                                                |                                                                                                                                                                   |                                                                                                       |                                                                  |
| 1                                                      | Interviewer/<br>facilitator                    | Which author/s conducted<br>the interview or focus<br>group?                                                                                                      | NB                                                                                                    | See Methods p6                                                   |
| 2                                                      | Credentials                                    | What were the researcher's<br>credentials? <i>E.g. PhD, MD</i>                                                                                                    | MD MSc (MJ)<br>undergraduate (NB),<br>BSc (DDC)                                                       | Online<br>submission<br>details                                  |
| 3                                                      | Occupation                                     | What was their occupation<br>at the time of the study?                                                                                                            | Sen Lect (MJ), MB BS /<br>iBSc student (NB),<br>student/junior doc<br>(DDC)                           | Cover sheet p1                                                   |
| 4                                                      | Gender                                         | Was the researcher male or<br>female?                                                                                                                             | Both genders                                                                                          |                                                                  |
| 5                                                      | Experience and<br>training                     | What experience or training<br>did the researcher have?                                                                                                           | MJ extensive research<br>and research<br>supervision, NK / DDC<br>developed expertise<br>during study |                                                                  |
| Relationship with<br>participants                      |                                                |                                                                                                                                                                   |                                                                                                       |                                                                  |
| 6                                                      | Relationship<br>established                    | Was a relationship<br>established prior to study<br>commencement?                                                                                                 | no                                                                                                    |                                                                  |
| 7                                                      | Participant<br>knowledge of<br>the interviewer | What did the participants<br>know about the researcher?<br><i>e.g. personal goals, reasons<br/>for doing the research</i>                                         | Information as set out<br>in pt info leaflet as<br>agreed by IRC/ ethics<br>committee                 | Methods<br>section p6                                            |
| 8                                                      | Interviewer<br>characteristics                 | What characteristics were<br>reported about the<br>interviewer/facilitator?<br><i>e.g. Bias, assumptions,<br/>reasons and interests in the<br/>research topic</i> | NK identified as medical<br>student, MJ as academic<br>and clinician                                  | Patient<br>information<br>sheet (PIS)<br>available on<br>request |



|    |                               |                                       |                                                                                                                                                                 |                                                                                                                                       |                       |
|----|-------------------------------|---------------------------------------|-----------------------------------------------------------------------------------------------------------------------------------------------------------------|---------------------------------------------------------------------------------------------------------------------------------------|-----------------------|
| 1  | <b>Domain 2: study design</b> |                                       |                                                                                                                                                                 |                                                                                                                                       |                       |
| 2  |                               |                                       |                                                                                                                                                                 |                                                                                                                                       |                       |
| 3  | Theoretical framework         |                                       |                                                                                                                                                                 |                                                                                                                                       |                       |
| 4  |                               |                                       |                                                                                                                                                                 |                                                                                                                                       |                       |
| 5  |                               |                                       |                                                                                                                                                                 |                                                                                                                                       |                       |
| 6  |                               |                                       |                                                                                                                                                                 |                                                                                                                                       |                       |
| 7  |                               |                                       |                                                                                                                                                                 |                                                                                                                                       |                       |
| 8  |                               |                                       |                                                                                                                                                                 |                                                                                                                                       |                       |
| 9  | 9                             | Methodological orientation and Theory | What methodological orientation was stated to underpin the study? <i>e.g. grounded theory, discourse analysis, ethnography, phenomenology, content analysis</i> | Thematic analysis (Ritchie and Spencer)                                                                                               | Methods section p 6-7 |
| 10 |                               |                                       |                                                                                                                                                                 |                                                                                                                                       |                       |
| 11 |                               |                                       |                                                                                                                                                                 |                                                                                                                                       |                       |
| 12 |                               |                                       |                                                                                                                                                                 |                                                                                                                                       |                       |
| 13 |                               |                                       |                                                                                                                                                                 |                                                                                                                                       |                       |
| 14 |                               |                                       |                                                                                                                                                                 |                                                                                                                                       |                       |
| 15 |                               |                                       |                                                                                                                                                                 |                                                                                                                                       |                       |
| 16 |                               |                                       |                                                                                                                                                                 |                                                                                                                                       |                       |
| 17 | Participant selection         |                                       |                                                                                                                                                                 |                                                                                                                                       |                       |
| 18 |                               |                                       |                                                                                                                                                                 |                                                                                                                                       |                       |
| 19 |                               |                                       |                                                                                                                                                                 |                                                                                                                                       |                       |
| 20 | 10                            | Sampling                              | How were participants selected? <i>e.g. purposive, convenience, consecutive, snowball</i>                                                                       | Pragmatic sample                                                                                                                      | Methods section p 6-7 |
| 21 |                               |                                       |                                                                                                                                                                 |                                                                                                                                       |                       |
| 22 |                               |                                       |                                                                                                                                                                 |                                                                                                                                       |                       |
| 23 |                               |                                       |                                                                                                                                                                 |                                                                                                                                       |                       |
| 24 |                               |                                       |                                                                                                                                                                 |                                                                                                                                       |                       |
| 25 |                               |                                       |                                                                                                                                                                 |                                                                                                                                       |                       |
| 26 |                               |                                       |                                                                                                                                                                 |                                                                                                                                       |                       |
| 27 |                               |                                       |                                                                                                                                                                 |                                                                                                                                       |                       |
| 28 | 11                            | Method of approach                    | How were participants approached? <i>e.g. face-to-face, telephone, mail, email</i>                                                                              | Prior selection by clinical team (to establish well enough to participate), approach with PIS by researcher, and "cooling off" period | Methods section p 6-7 |
| 29 |                               |                                       |                                                                                                                                                                 |                                                                                                                                       |                       |
| 30 |                               |                                       |                                                                                                                                                                 |                                                                                                                                       |                       |
| 31 |                               |                                       |                                                                                                                                                                 |                                                                                                                                       |                       |
| 32 |                               |                                       |                                                                                                                                                                 |                                                                                                                                       |                       |
| 33 |                               |                                       |                                                                                                                                                                 |                                                                                                                                       |                       |
| 34 |                               |                                       |                                                                                                                                                                 |                                                                                                                                       |                       |
| 35 | 12                            | Sample size                           | How many participants were in the study?                                                                                                                        | 43, 39 analysed                                                                                                                       | Results section p9    |
| 36 |                               |                                       |                                                                                                                                                                 |                                                                                                                                       |                       |
| 37 |                               |                                       |                                                                                                                                                                 |                                                                                                                                       |                       |
| 38 |                               |                                       |                                                                                                                                                                 |                                                                                                                                       |                       |
| 39 |                               |                                       |                                                                                                                                                                 |                                                                                                                                       |                       |
| 40 |                               |                                       |                                                                                                                                                                 |                                                                                                                                       |                       |
| 41 | 13                            | Non-participation                     | How many people refused to participate or dropped out? Reasons?                                                                                                 | Not recorded                                                                                                                          |                       |
| 42 |                               |                                       |                                                                                                                                                                 |                                                                                                                                       |                       |
| 43 |                               |                                       |                                                                                                                                                                 |                                                                                                                                       |                       |
| 44 |                               |                                       |                                                                                                                                                                 |                                                                                                                                       |                       |
| 45 |                               |                                       |                                                                                                                                                                 |                                                                                                                                       |                       |
| 46 | Setting                       |                                       |                                                                                                                                                                 |                                                                                                                                       |                       |
| 47 |                               |                                       |                                                                                                                                                                 |                                                                                                                                       |                       |
| 48 | 14                            | Setting of data collection            | Where was the data collected? <i>e.g. home, clinic, workplace</i>                                                                                               | On hospital ward (including coronary care unit)                                                                                       | Methods section p6-7  |
| 49 |                               |                                       |                                                                                                                                                                 |                                                                                                                                       |                       |
| 50 |                               |                                       |                                                                                                                                                                 |                                                                                                                                       |                       |
| 51 |                               |                                       |                                                                                                                                                                 |                                                                                                                                       |                       |
| 52 |                               |                                       |                                                                                                                                                                 |                                                                                                                                       |                       |
| 53 | 15                            | Presence of non-participants          | Was anyone else present besides the participants and researchers?                                                                                               | Occasionally patients' relatives stayed during the interview.                                                                         |                       |
| 54 |                               |                                       |                                                                                                                                                                 |                                                                                                                                       |                       |
| 55 |                               |                                       |                                                                                                                                                                 |                                                                                                                                       |                       |
| 56 |                               |                                       |                                                                                                                                                                 |                                                                                                                                       |                       |
| 57 |                               |                                       |                                                                                                                                                                 |                                                                                                                                       |                       |
| 58 |                               |                                       |                                                                                                                                                                 |                                                                                                                                       |                       |
| 59 |                               |                                       |                                                                                                                                                                 |                                                                                                                                       |                       |
| 60 |                               |                                       |                                                                                                                                                                 |                                                                                                                                       |                       |

|                                        |                                |                                                                                          |                                                                   |                                   |
|----------------------------------------|--------------------------------|------------------------------------------------------------------------------------------|-------------------------------------------------------------------|-----------------------------------|
| 16                                     | Description of sample          | What are the important characteristics of the sample? <i>e.g. demographic data, date</i> |                                                                   | Recorded in table 1 of manuscript |
| Data collection                        |                                |                                                                                          |                                                                   |                                   |
| 17                                     | Interview guide                | Were questions, prompts, guides provided by the authors? Was it pilot tested?            | Yes                                                               | Methods section p6-7              |
| 18                                     | Repeat interviews              | Were repeat interviews carried out? If yes, how many?                                    | No                                                                | Methods section p6-7              |
| 19                                     | Audio/visual recording         | Did the research use audio or visual recording to collect the data?                      | Audio-recording                                                   | Methods section p6-7              |
| 20                                     | Field notes                    | Were field notes made during and/or after the interview or focus group?                  | Yes                                                               | Methods section p6-7              |
| 21                                     | Duration                       | What was the duration of the interviews or focus group?                                  | 5-48 minutes                                                      | Results section p9                |
| 22                                     | Data saturation                | Was data saturation discussed?                                                           | Yes                                                               | Results p10                       |
| 23                                     | Transcripts returned           | Were transcripts returned to participants for comment and/or correction?                 | No as no identifiable data was removed from the ward              | See methods p6-7                  |
| <b>Domain 3: analysis and findings</b> |                                |                                                                                          |                                                                   |                                   |
| Data analysis                          |                                |                                                                                          |                                                                   |                                   |
| 24                                     | Number of data coders          | How many data coders coded the data?                                                     | 2                                                                 |                                   |
| 25                                     | Description of the coding tree | Did authors provide a description of the coding tree?                                    | Thematic analysis was recorded as an excel spreadsheet not a tree |                                   |

|           |                              |                                                                                                                                          |                                          |                   |
|-----------|------------------------------|------------------------------------------------------------------------------------------------------------------------------------------|------------------------------------------|-------------------|
| 26        | Derivation of themes         | Were themes identified in advance or derived from the data?                                                                              | Data derived                             | See methods p6-7  |
| 27        | Software                     | What software, if applicable, was used to manage the data?                                                                               | Spreadsheet and word processing software | See methods p8    |
| 28        | Participant checking         | Did participants provide feedback on the findings?                                                                                       | No (see previous comments)               | See methods p6    |
| Reporting |                              |                                                                                                                                          |                                          |                   |
| 29        | Quotations presented         | Were participant quotations presented to illustrate the themes / findings? Was each quotation identified? e.g. <i>participant number</i> | Yes identified by participant number.    | See methods p7    |
| 30        | Data and findings consistent | Was there consistency between the data presented and the findings?                                                                       | Yes                                      |                   |
| 31        | Clarity of major themes      | Were major themes clearly presented in the findings?                                                                                     | Yes                                      | See results p9-18 |
| 32        | Clarity of minor themes      | Is there a description of diverse cases or discussion of minor themes?                                                                   | Yes                                      | See results p9-18 |

# BMJ Open

**“Just like a normal pain”- what do people with diabetes mellitus experience when having a myocardial infarction - a qualitative study recruited from UK hospitals.**

|                                 |                                                                                                                                                                                                                                                                                                                                                                                    |
|---------------------------------|------------------------------------------------------------------------------------------------------------------------------------------------------------------------------------------------------------------------------------------------------------------------------------------------------------------------------------------------------------------------------------|
| Journal:                        | <i>BMJ Open</i>                                                                                                                                                                                                                                                                                                                                                                    |
| Manuscript ID                   | bmjopen-2016-015736.R3                                                                                                                                                                                                                                                                                                                                                             |
| Article Type:                   | Research                                                                                                                                                                                                                                                                                                                                                                           |
| Date Submitted by the Author:   | 14-Jun-2017                                                                                                                                                                                                                                                                                                                                                                        |
| Complete List of Authors:       | Berman, Nikita; UCL, Research Department of Primary Care and Population Health; Plymouth Hospitals NHS Trust<br>Jones, Melvyn; UCL, Research Department of Primary Care and Population Health; Warden Lodge Surgery,<br>De Coster, Daan; Princess Royal University Hospital, King's College NHS Trust, Bromley, UK; UCL, Research Department of Primary Care and Population Health |
| <b>Primary Subject Heading</b>: | Cardiovascular medicine                                                                                                                                                                                                                                                                                                                                                            |
| Secondary Subject Heading:      | Diabetes and endocrinology, Qualitative research, Emergency medicine, General practice / Family practice                                                                                                                                                                                                                                                                           |
| Keywords:                       | Chest pain, Myocardial infarction < CARDIOLOGY, Diabetic nephropathy & vascular disease < DIABETES & ENDOCRINOLOGY                                                                                                                                                                                                                                                                 |
|                                 |                                                                                                                                                                                                                                                                                                                                                                                    |

SCHOLARONE™  
Manuscripts

Only

1  
2  
3  
4  
5  
6  
7 “Just like a normal pain”- what do people with diabetes mellitus  
8 experience when having a myocardial infarction - a qualitative study  
9 recruited from UK hospitals.  
10  
11  
12  
13  
14  
15  
16  
17  
18  
19  
20  
21  
22  
23  
24  
25  
26  
27

28 Dr Nikita Berman (1) (2), Dr Melvyn M Jones (1), Dr Daan A De Coster (3)  
29  
30  
31  
32  
33

34 Corresponding author: Dr Melvyn Jones ORCID ID 0000-0002-8766-7443  
35 Email: [melvyn.jones@ucl.ac.uk](mailto:melvyn.jones@ucl.ac.uk)  
36  
37  
38

- 39 1. Research Department of Primary Care and Population Health  
40 UCL Medical School, London, UK.  
41
- 42 2. Plymouth Hospitals NHS Trust  
43 Derriford Road, Crownhill, Plymouth, Devon, PL6 8DH, UK  
44
- 45 3. Princess Royal University Hospital Bromley, King's College NHS Trust, UK  
46  
47  
48  
49  
50  
51  
52  
53  
54  
55  
56  
57  
58  
59  
60

## Abstract

**Objective:** The objective of the study was to investigate the symptoms people with diabetes experience when having a myocardial infarction (MI), their illness narrative, and how they present their symptoms to the health service.

**Setting:** Three London (United Kingdom) hospitals- Coronary care units (CCU) and medical wards.

**Participants:** Patients were recruited with diabetes mellitus (DM) (Type 1 & 2) with a clinical presentation of MI (ST elevated myocardial infarction [STEMI], non ST elevated myocardial infarction [NSTEMI], acute MI unspecified & cardiac arrest). 43 participants were recruited, 39 interviews met the study criteria and were analysed. They were predominantly male (n=30), aged 40-90 years and white British (18/39), just over a half were from other ethnic groups. The majority had type II DM (n=35); 24 had an NSTEMI, 10 had an STEMI and 5 had other cardiac events.

**Definitions of selection / exclusion criteria:** a diagnosis of MI, and DM, the ability to communicate enough English to complete the interview. Ward staff made a clinical judgement that the participant was post-treatment, clinically stable and well enough to participate.

**Methods:** A qualitative study utilising taped and transcribed interviews analysed using a thematic analysis.

**Results:** While most participants did experience chest pain, it was often not their most striking symptom. As their chest pain did not match their expectations of what a "heart attack" should be, participants developed narratives to explain these symptoms, including the symptoms being effects of their DM ("hypos"), side effects of medication (oral hypoglycaemics) or symptoms (such as breathlessness and indigestion) related to other comorbidities; often leading to delays in seeking care.

### **Conclusions:**

While truly absent chest pain during MI among people with DM was rare in this study, patients' attenuated symptoms often led to delay in seeking attention, and this may result in delays in receiving treatment.

**Data sharing:** - No additional data available.

## Article summary

### Strengths and weaknesses

This is a study of people with diabetes experiencing an MI.

Strengths of the study include:

- contemporaneous patients' descriptions of their symptoms and illness narrative just after an MI,
- a model of how attenuated MI symptoms might alter help seeking behaviour,
- the participants were from a wide demographic background in terms of age, ethnicity and disease burden.

Weaknesses include:

- by recruiting patients from coronary care units we will not have captured markedly discrepant presentations,
- by recruiting on the basis of the ability to communicate in English we will have lost some cultural and linguistic nuance in symptom presentation.

## Background

Diabetes Mellitus (DM) is a common health problem worldwide and affects 4-6% of the UK population.<sup>1</sup> Cardiovascular disease (CVD) is the major life threatening complication of DM in the UK.<sup>2 3 4</sup> Myocardial infarction (MI) is the prime cause of excess mortality among those with DM, with a 3-fold increased risk of coronary heart disease (CHD) mortality,<sup>5 6</sup> a 6-fold increased risk of myocardial infarction (MI)<sup>7</sup> and a worse prognosis from MI compared with populations without diabetes.<sup>8</sup>

Possible mechanisms of this excess mortality risk include comorbidities such as hypertension, dyslipidaemia and chronic kidney disease. An important element in this observed increased mortality may be late or missed presentation by patients, and diagnosis by clinicians.<sup>9 10 11</sup>

Up to a third of people who suffer an MI can have no chest pain; however people with DM make up a larger proportion of this group (32.6% vs 25.4% in one study).<sup>12</sup> However, when people with DM do have symptoms of an MI, their symptoms may often be atypical<sup>13</sup> or unusual.<sup>14</sup> Nevertheless, there is conflicting evidence around this issue: Funk found no statistically significant difference in CHD symptom presentation in people with and without DM, but did report non-significant increases in dyspnoea, neck and throat pain among those with DM.<sup>15</sup> Kentsch found no differences between these groups in the frequency or severity of chest pain but also identified differences in the prevalence of dyspnoea.<sup>16</sup> One review found conflicting results about differing MI symptoms among women with and without DM.<sup>17</sup>

There are several methodological reasons why these studies may have conflicting results: being underpowered,<sup>18 19</sup> being unrepresentative of the population at risk,<sup>18</sup> or recruited from highly selected hospital populations.<sup>20</sup> Survivor bias (i.e. living to tell the tale of your symptoms) may also be an important issue in a condition such as MI which has a high early mortality.<sup>21</sup>

There is a biological basis for altered perception of pain among people with diabetes in that cardiac autonomic neuropathy (CAN) is a complication of DM and leads to



1  
2  
3 altered pain perception, meaning a patient might not experience pain caused by  
4 myocardial ischaemia.<sup>20</sup>  
5  
6

7 Several qualitative studies have explored patients' symptoms during MI.<sup>22 23 24 25 26</sup>

8  
9 <sup>18</sup> Within the general population experiencing MI, there are several issues identified  
10 including; the considerable psychological impact of pain and specifically cardiac  
11 pain,<sup>27</sup> cardiac symptoms that can be interpreted as pain, but also can trigger  
12 symptoms such as anxiety (both as a trigger and barrier to action) and fear,<sup>28</sup>  
13 producing responses like uncertainty,<sup>29</sup> and denial.<sup>30</sup> Further factors identified  
14 include patients not recognising their symptoms as MI, experiencing vague  
15 symptoms,<sup>31</sup> misattributing their symptoms,<sup>23 24</sup> erroneous expectations of an MI,  
16 <sup>31</sup> and the decisions patients make during their MI.<sup>32</sup> Other factors include delays in  
17 seeking care.<sup>30 11</sup> Theoretical models of delay in seeking treatment specifically in  
18 relation to MI have been summarised by Dracup.<sup>33</sup> Underestimating personal risk of  
19 an MI,<sup>23</sup> and perceived lack of vulnerability to heart disease link to the concept of  
20 "lay epidemiology" and of "coronary candidacy" i.e. not fitting assumptions about the  
21 sort of person who gets a heart attack.<sup>34</sup>  
22  
23  
24  
25  
26  
27  
28  
29  
30

31 There is a role of gender with MI symptoms and its interpretation; work exploring  
32 women's experience of MI symptoms found that women with diabetes had more  
33 atypical and painless MIs than men.<sup>35</sup> In studies of denial among men, there has  
34 been exploration of the impact of their gender roles adversely effecting health  
35 seeking behaviour.<sup>36</sup>  
36  
37  
38  
39

40 In studies specifically exploring the experience of patient with diabetes and MI, many  
41 similar themes emerge. However Angerud finds a variability in the experience of MI  
42 symptoms while exploring the patients' response to symptoms, perceived  
43 susceptibility, and symptom interpretation (but found that MI symptoms were rarely  
44 ascribed to DM).<sup>25</sup> Other studies in this population also identify breathlessness as a  
45 presenting symptom, misinterpretation of symptoms; and their diabetes influencing  
46 patients' decision making during events.<sup>37</sup>  
47  
48  
49  
50  
51

52  
53 Clinician factors  
54  
55  
56  
57  
58  
59  
60

1  
2  
3 The way clinicians ask about chest symptoms may be problematic. Clinicians ask  
4 about “chest pain”, however the term “pain”,<sup>38 39</sup> is often not used by patients  
5 experiencing MI.  
6  
7

8  
9 In the current study, we aimed to address some of the limitations of previous  
10 research by recruiting only DM patients with clear evidence of a recent MI,  
11 regardless of their chest pain presentation, and use of a qualitative methodology to  
12 explore how these patients describe their symptoms. Qualitative methods can help  
13 overcome a narrow clinician focus and help develop a patient orientated view when  
14 exploring symptoms of disease.<sup>37 40 23 41</sup> The aim of the study was to investigate  
15 the symptoms people with diabetes experience when having a myocardial infarction,  
16 their illness narrative, and how they present their symptoms to the health service.  
17  
18  
19  
20  
21  
22  
23  
24  
25  
26  
27  
28  
29  
30  
31  
32  
33  
34  
35  
36  
37  
38  
39  
40  
41  
42  
43  
44  
45  
46  
47  
48  
49  
50  
51  
52  
53  
54  
55  
56  
57  
58  
59  
60

## Methods

This was a qualitative study where interviews were undertaken with patients with DM who have recently had a confirmed MI, recruited within coronary care units (CCU). Eligibility criteria included a confirmed diagnosis of MI (according to AHA criteria <sup>42</sup>), a clinical diagnosis of DM and the ability to communicate (understand and speak) enough English to complete the interview. Clinical staff identified participants and ensured they were post-treatment, clinically stable and well enough to participate. This subjective judgement was made by the clinical staff involved in participants' care as required by the ethics committee. Participants were approached as soon as possible after the diagnosis by a researcher (NB) so we could be sure that they had had an MI (usually a retrospective or working diagnosis) and to minimise recall bias about symptoms. Once invited, they were given a patient information sheet (PIS) about the study and 24 hours to decide whether to participate (see comments regarding ethics approval). The interviews took place in three London, UK hospitals. We aimed to recruit consecutive patients (but this proved unworkable) so this was a pragmatic sample. <sup>43</sup>

The interviews were semi-structured and iterative building from a topic guide to include a narrative of the course, range, character and severity of the symptoms the person experienced before and during their MI. We used a checklist of AMI symptoms based on Funk's acute myocardial infarction (AMI) symptom list. <sup>15</sup> This is distinct to Diamond and Forrester's classification of angina typicality. <sup>44</sup> The checklist was worked through to ensure symptoms were absent and not just omitted. Ideas about expected symptoms of an MI, and symptom attribution were also explored as people often develop complex narratives about their illnesses. <sup>45</sup> We also explored participants' thoughts about their illness, treatments they had attempted, motives and triggers for seeking help, awareness and knowledge of the symptoms of a heart attack.

Interviews were audio recorded, field notes and baseline patient information were noted. Details gathered included the type of MI (ECG changes, troponin level, clinical assessment), the patients' demographics, co-morbidities (type and duration of DM,

1  
2  
3 other disease), risk factors, family history, medication use and information that might  
4 impact on symptom perception, from the informant and their medical records. All  
5 participants were allocated a code number to link their data together and then  
6 anonymised (apart from the consent form) so that identifiable data did not leave the  
7 ward setting.  
8  
9

10  
11  
12 The audio taped interviews were transcribed verbatim and manually analysed using  
13 a thematic framework approach,<sup>22 46</sup> using word processing and spreadsheet  
14 software. Agreement was specifically sought between reviewers about the  
15 classification of symptoms as either typical or atypical as outlined by Funk.<sup>15</sup> Two  
16 independent researchers (NB, DDC) read the transcripts and analysed the data  
17 using the following steps: familiarisation, identifying a thematic framework, indexing,  
18 charting, mapping and interpretation. Throughout this process, transcripts were  
19 repeatedly re-read to focus on specific points and ideas, to verify the presence of the  
20 themes and sub-themes that are identified and ensure the context of the themes has  
21 been preserved. There was then a dialogue between all the researchers which was  
22 reflexive in nature linking the findings back to the study's aims. The analysis was  
23 deductive or theoretical in approach in that we were looking for themes around  
24 diabetes and myocardial infarction, and bounded by an expectation of probable  
25 reduced or absent pain symptomatology and this shaped our topic guide and  
26 approach to the data. However, the analysis was also inductive in nature, in that we  
27 needed to derive themes from the data, in as much that if there were no pain  
28 symptoms during the MI, we needed the participants and their narratives to tell us  
29 what they did experience. The themes around reporting of symptoms is semantic  
30 (or a surface meaning) in that we are largely reporting the participants' descriptions  
31 of their experience. However, the explanatory models around what participants  
32 thought caused their symptoms and reactions to those symptom is a much more  
33 latent thematic or interpretive analysis.<sup>22</sup> Representative quotes (with consent)  
34 were used and have identifying details to link the theme to the participants'  
35 characteristics.  
36  
37  
38  
39  
40  
41  
42  
43  
44  
45  
46  
47  
48  
49  
50  
51

52  
53 The lay term "heart attack" is used extensively in the transcripts; this can have a  
54 broad popular meaning but we will assume is used by participants to suggest a  
55 myocardial infarction.  
56  
57  
58  
59  
60

1  
2  
3 Ethical approval for this study and the use of quotes was obtained from the  
4 Hertfordshire Research Ethics Committee. (Project no: 11/EE/0045). The committee  
5 requested that we allowed a “cool off” period of 24 hours from approach to obtaining  
6 consent. Data protection and local hospital trust R&D policies were followed.  
7  
8 Consent was not originally sought to disclose the full interview transcripts.  
9  
10

### 11 Patient involvement

12  
13  
14 The original idea for this study was based on a clinical encounter in general practice.  
15 A patient consulted MJ his GP, having suffered a severe MI despite having minimal  
16 symptoms and subsequently developed severe heart failure. Before his death, this  
17 patient agreed to support research in this area and filmed a brief video of his  
18 experiences. A broader study (with same research question but a different  
19 methodology) on this field was presented and supported by the North East London  
20 Diabetes Research Network Lay Panel Meeting in 2011. Patients’ narratives  
21 constitute the data underlying this study.  
22  
23  
24  
25  
26  
27  
28  
29  
30  
31  
32  
33  
34  
35  
36  
37  
38  
39  
40  
41  
42  
43  
44  
45  
46  
47  
48  
49  
50  
51  
52  
53  
54  
55  
56  
57  
58  
59  
60

## Results

Forty three participants were recruited from the participating hospitals, however 4 interviews proved unusable due to not meeting study recruitment criteria on detailed case review and were excluded, resulting in a total of 39 participants' data available for analysis. Data on those who declined to participate was not recorded as it would have placed an additional burden on ward staff. The interviews had a mean duration of 20mins 33 sec (with a range of 5 mins 14 secs to 48mins 46 secs) and were all undertaken by one interviewer; NB. The study comprised of 30 men and 9 women; with an age range of 40-90, 35 participants had type 2 DM and 4 had type 1 DM. All participants had confirmed acute coronary syndrome; 24 had NSTEMIs, 10 had STEMIs and 5 had other MIs (acute MI-unspecified including 4 cardiac arrests). Their ethnic categories were White British (n=18), Asian/ south Asian (n=7), African or Afro-Caribbean (n=3) and others (n=5) e.g. Turkish, Maltese etc. A number (n=6) declined to state their ethnicity or instead identified their religious affiliation e.g. "Church of England", "Jewish" etc. One interview was done via an informal family translator but frequently family members would participate in the interview (in 2 interviews), clarifying the order of events or reminding the participant about elements of their illness narrative (which may have been clouded by their illness including cardiac arrest or treatment such as strong opioid analgesics). Participants were usually approached to participate the day following admission, or the Monday following a weekend admission and then interviewed usually the following day after consenting to participate as per our ethics approval. Data saturation was achieved. Each participant was given a study number between 1 to 43 and quotes are linked e.g. participant 22 (P22)

Table 1: description of participants

| Participant | Age range | Type of DM | Duration of DM range (years) | Treatment of DM | Type of MI                            |
|-------------|-----------|------------|------------------------------|-----------------|---------------------------------------|
| 1           | 70-79     | 2          | 10-19                        | OHG             | NSTEMI                                |
| 2           | 50-59     | 2          | 10-19                        | OHG/ In         | NSTEMI                                |
| 3           | 80-89     | 2          | 10-19                        | OHG/ In         | Acute MI unspecified                  |
| 4           | 40-49     | 2          | 0-9                          | OHG             | NSTEMI                                |
| 5           | 70-79     | 2          | 20-29                        | OHG             | NSTEMI                                |
| 6           | 50-59     | 2          | 10-19                        | In              | NSTEMI                                |
| 8           | 70-79     | 2          | 10-19                        | OHG             | Acute MI unspecified                  |
| 10          | 70-79     | 2          | 10-19                        | OHG/ DIET       | STEMI                                 |
| 11          | 50-59     | 1          | 10-19                        | In              | STEMI                                 |
| 13          | 60-69     | 2          | NR                           | OHG/ In         | NSTEMI                                |
| 14          | 80-89     | 2          | 0-9                          | OHG             | STEMI                                 |
| 15          | 60-69     | 2          | 0-9                          | OHG             | STEMI                                 |
| 16          | 70-79     | 2          | 0-9                          | OHG             | NSTEMI                                |
| 17          | 60-69     | 2          | >10                          | OHG +           | NSTEMI                                |
| 18          | 70-79     | 2          | Nr                           |                 | Acute MI unspecified                  |
| 19          | 60-69     | 1          | 40-49                        | In              | NSTEMI                                |
| 20          | 80-89     | 2          | 0-9                          | OHG             | NSTEMI                                |
| 21          | 70-79     | 2          | >10                          | OHG             | Acute MI unspecified/ cardiac arrest  |
| 22          | 60-69     | 2          | NR                           | OHG             | NSTEMI                                |
| 23          | 60-69     | 2          | 0-9                          | OHG             | Acute MI unspecified / cardiac arrest |
| 24          | 70-79     | 2          | 10-19                        | OHG             | NSTEMI/ cardiac arrest                |
| 25          | 70-79     | 2          | >25                          | OHG/In          | STEMI                                 |
| 26          | 50-59     | 2          | 10-19                        | OHG/ In         | STEMI                                 |
| 27          | 70-79     | 2          | 0-9                          | OHG             | STEMI/ cardiac arrest                 |
| 29          | 50-59     | 1          | 30-39                        | In              | NSTEMI                                |
| 30          | 60-69     | 2          | 10-19                        | OHG + / In      | NSTEMI                                |
| 31          | 40-49     | 2          | 0-9                          | OHG             | STEMI                                 |
| 32          | 80-89     | 2          | >20                          | OHG+            | NSTEMI                                |
| 33          | 60-69     | 2          | 10-19                        | OHG+            | STEMI                                 |
| 34          | 60-69     | 2          | 10-19                        | OHG             | STEMI                                 |
| 35          | 50-59     | 2          | 0-9                          | Diet            | NSTEMI                                |
| 36          | 40-49     | 2          | 20-29                        | OHG/ In         | NSTEMI                                |
| 37          | 60-69     | 2          | 0-9                          |                 | NSTEMI                                |
| 38          | 70-79     | 2          | 10-19                        | OHG             | NSTEMI                                |
| 39          | 50-59     | 2          | 10-19                        | OHG/ In         | NSTEMI                                |
| 40          | 40-49     | 1          | 30-39                        | OHG/ In         | NSTEMI                                |

|    |       |   |       |     |        |
|----|-------|---|-------|-----|--------|
| 41 | 90-99 | 2 | 30-39 | In  | NSTEMI |
| 42 | 50-59 | 2 | 0-10  | OHG | NSTEMI |
| 43 | 60-69 | 2 | 10-19 | OHG | NSTEMI |

Cases 7, 9, 12 and 28 not included as did not meet study criteria

#### Key

Treatment key: OHG oral hypoglycaemics eg Metformin/ glicazide etc, In –insulins, OHG + oral hypoglycaemics + other drugs eg gliptins/ glitazones

### Themes

The analysis of the data led to the identification of the following themes and sub themes.

#### Symptoms

- Typical vs atypical presentations
  - Atypical presentations
- Absence of pain

#### Attribution and consequences

- Attributing symptoms to co-morbidities
  - Ascribing symptoms to DM
  - Ascribing symptoms to hypoglycaemia
- Delay in seeking help
- Gradual onset of symptoms
  - Multiple symptoms
- Lack of awareness of MI symptoms or their increased risk of MI
  - Experience of repeat MIs
- Language of pain
- Knowing “something was wrong”



1  
2  
3  
4  
5  
6  
7  
8  
9  
10  
11  
12  
13  
14  
15  
16  
17  
18  
19  
20  
21  
22  
23  
24  
25  
26  
27  
28  
29  
30  
31  
32  
33  
34  
35  
36  
37  
38  
39  
40  
41  
42  
43  
44  
45  
46  
47  
48  
49  
50  
51  
52  
53  
54  
55  
56  
57  
58  
59  
60

However, these themes are not distinct. The nature of obtaining patients' narratives means that there are complex, inseparable relationships in concepts and ideas, with a continuum across themes and subthemes.

### Symptoms

Participants described a wide range of symptoms, primarily around chest pain and discomfort. However, other symptoms associated with MI such as sweating and breathlessness were described, as well as a series of symptoms that are not usually associated with MI presentations. With regard to chest pain, we found a range of symptom presentations.

#### Typical versus atypical presentations.

Chest pain of a specific character is regarded as the classic symptom of MI and was present in most of these interviews;

*"It was like your chest was being crushed." (P3)*

Many of these descriptions catch this essence of a typical MI;

*"Err a real dull ache and like someone is screwing up, like a tight chest just really tight, like someone is squeezing it inside....yeah like a really, really dull pain"... "it started hurting and made me feel really ill ...but then I went really pale & started sweating .. absolutely saturated.. just a really tight chest and sore like, as if there was a weight directly on top of me". (P 11)*

Most of those in the study experienced some typical symptoms. However, typical symptoms with a recent chronology (necessary to suspect MI) was not always present or immediately apparent in the interviews.

Some experienced sweating; regarded as a typical MI symptom;

*"My night clothes were soaking wet." (P3).*

Breathlessness was also experienced either with pain or separately, which although classed as a "typical" symptom [23], is not generally recognised by clinicians to be suggestive of an MI;

1  
2  
3 *"I can't breathe, you couldn't breathe, my wife she phone a medic ... No you*  
4 *got the pain and you can't breathe...you think you're gonna die for the lack of*  
5 *breath", (P14)*  
6  
7

8  
9 *"Like somebody's pushing me...and I'm short of breath and then it was getting*  
10 *worse and it start burning". (P35)*  
11

### 12 Atypical pain

13  
14  
15 Some of those in this study sometimes narrated their experience of a diffuse and  
16 ambiguous set of symptoms that may not raise suspicion of MI;  
17

18  
19 *"It feels like something crawling up my arm... and it bites deep in there...the*  
20 *only way I can describe it, it feels like someone is in there with claws and*  
21 *they're tearing at your inside. Just screaming and pulling at it. Very, very*  
22 *strange pain indeed", (P24)*  
23  
24  
25

26  
27 although this person later describes quite typical sounding symptoms. Others  
28 described the quality of their pain;  
29

30  
31 *"It was just sticking pain, it was just a really pain, stay there for about 3*  
32 *hours", (P30)*  
33

34  
35 *"Like a normal pain, it wasn't a pain, actually it was dull". (P26)*  
36

37  
38 These quotes raise the issue of participants' use of language which is discussed  
39 later.  
40

41  
42 The following quote illustrates a mixture of some typical and atypical symptoms;  
43

44  
45 *"I can feel something happening you know, my chest, had very bad pain in my*  
46 *arm, my neck and my leg, I couldn't move... Yeah sharp pain, very sharp*  
47 *...Somebody was pressing my, you know, chest...My back... All the way up to*  
48 *the waist...I couldn't breathe you know. I get very deep breath, I tried to do it*  
49 *but it didn't go, somebody was choking me". (P5)*  
50  
51  
52

53  
54 The inseparability of these two types of symptoms (typical/ atypical) is raised in the  
55 discussion.  
56  
57  
58  
59  
60

1  
2  
3 Symptoms of weakness and tiredness were also reported around the timing of the  
4 MI. One participant could not walk and said;

5  
6  
7 *"It's just the sheer um lethargy really, I just couldn't do anything...I wasn't*  
8 *giddy and I wasn't in a lot of pain, I just couldn't sort of come to, I was, I*  
9 *couldn't put one foot in front of the other. I was just so weak". (P10)*

### 12 13 Absence of pain

14  
15 Some clearly stated they had no chest pain;

16  
17  
18 *"Nothing, nothing, no discomfort, no pain" (pre cardiac arrest), (P27)*

19  
20 but this participant did have pain after being resuscitated. Another reported;

21  
22  
23 *"No pain, no sweating, nothing else" (pre cardiac arrest). (P23)*

24  
25 Both of these participants experienced cardiac arrests, so some degree of event  
26 amnesia cannot be excluded.

### 28 29 Attribution and consequences

#### 30 31 32 Attributing symptoms to co-morbidities

33  
34 The participants seemed to rationalise their symptoms and find a reason to dismiss  
35 that the cause of their symptoms could be a "heart attack". Many attributed their  
36 symptoms to other illness and causes. Most commonly, they attributed their  
37 symptoms to indigestion leading to self-medication with antacids for this;

38  
39  
40  
41  
42 *"when you feel bloated and gassy and it's similar to that sort of pain. That's*  
43 *why I mistook it for being indigestion.... I put it down to nerves or exercise*  
44 *...but then in the early hours of Sunday morning I realised it couldn't have*  
45 *been indigestion because it was paining me a great deal", (P31)*

46  
47  
48  
49 *"I took, bicarb of soda, didn't work. I took um Gaviscon (antacid remedy),*  
50 *didn't work. The antibiotics didn't work. That's when I knew, there was more to*  
51 *this". (P3)*

52  
53  
54  
55 but symptoms were also attributed to other causes that included asthma, muscular  
56 aches, panic attacks, stress and importantly in this group, their DM;

1  
2  
3 *"Because of, I have other illness(es), like blood pressure, diabetes, I didn't think*  
4 *(of MI), because I thought there is nothing wrong with my heart."* (P4).  
5  
6

7 These quotes also link to the theme of delay (both by patient and clinician in this  
8 instance) which is discussed further on.  
9

#### 10 Ascribing symptoms to DM

11  
12  
13 Participants sometimes specifically attributed their symptoms to (lack) of control of  
14 their DM, symptoms of DM or side effects of their medication;  
15  
16

17  
18 *"I didn't realise I was having heart attack, so I was feeling rotten ...I was*  
19 *hungry. Well I wasn't really hungry but I know, don't, diabetic, ...that's when*  
20 *the pain come, and I went to bed and it woke me up around 2 in the morning",*  
21 *(P17)*  
22  
23

24  
25 *"Well dizzy, tired, again I'm dizzy all the time with diabetes, you get that, that's*  
26 *part and parcel of being diabetic". (P17)*  
27  
28

29 Participant 3 also attributed her dizziness during her MI to her DM;  
30

31  
32 *"Not fainting, but you know dizzy turns, because I do get these dizzy turns.*  
33 *You see, this is all in with the diabetes you see". (P3)*  
34  
35

#### 36 Ascribing symptoms to hypoglycaemia

37  
38 Patients when experiencing some symptoms, particularly sweating and feeling  
39 unwell perceived themselves to be experiencing hypoglycaemia ("Hypo"), for  
40 example;  
41  
42

43  
44 *"because I am diabetic, right, um, I thought, initially I thought it was um low*  
45 *blood sugar", (P2.)*  
46  
47

48  
49 *"A little (of sweating) bit, but ...I didn't have my testing gear with me & I*  
50 *thought that it might be a hypo at the time". (P11)*  
51  
52

53 Participant 3 perceived herself to be experiencing hypoglycaemia;  
54  
55  
56  
57  
58  
59  
60

1  
2  
3 *"That's when I knew, there was more to this (symptoms) and I had, I don't*  
4 *know whether I had five hypo's in that week, but I was rolling all over the*  
5 *place". (P3).*  
6  
7

### 8 Delay in seeking help

9  
10  
11 Delay in help seeking was a prominent feature in these narratives;

12  
13  
14 *"I think to be honest it (chest pain) came on suddenly but I tended to ignore it,*  
15 *I've got one more screw to put in", (P21)*  
16

17  
18 *"I waited till my GP opened in the morning. I called him and I told him what's*  
19 *wrong, they said 'just phone the ambulance' ". (P5).*  
20

21  
22 This delay could be ascribed to participants' failure to attribute symptoms to MI,  
23 attribution to co-morbidities, lack of symptom awareness or lack of awareness of  
24 increased risk of MI; but participants often realised that something more serious was  
25 occurring when their symptoms did not improve;  
26  
27

28  
29 *"But it was there too long, so I said 'could be heart attack' ". (P30)*  
30

31  
32 Often participants had dismissed or explained away these one off or minor  
33 symptoms and did not think much of them, except with hindsight;  
34

35  
36 *"more during the week. Nothing sharp... it was just a niggling thing, it just*  
37 *came and then it went away ... you just didn't think too much of any of these*  
38 *factors in isolation; but together". (P31)*  
39  
40

41  
42 With others, denial was behind their delay;

43  
44 *"Well I thought it was a heart attack but I didn't really want to admit it at the*  
45 *time. Anything other than a heart attack". (P17)*  
46  
47

### 48 49 50 Gradual onset of symptoms

51  
52  
53 For some participants part of this delay was the gradual rather than sudden onset of  
54 symptoms;  
55  
56

1  
2  
3 *"Well no ...it had happened a fortnight before"... "Sat in the chair for about*  
4 *20mins and then it went so then I said to my wife, I told her 'If it happens*  
5 *again I would be calling the doctor' ". (P20)*  
6  
7

### 8 9 Multiple symptoms

10  
11 The respondents often had complex narratives where chest pain was a part of the  
12 symptom complex they described, but their chest pain symptom may not have been  
13 the most prominent, important or distressing feature; exemplified by the following  
14 quote;  
15  
16

17  
18 *"It (chest pain) did come on suddenly ...at the same time I had this very heavy*  
19 *perspiration...& this very uncomfortable tummy ache...Err all three things*  
20 *hitting me at once; you don't pick one out in particular ...all those three factors*  
21 *the er tummy ache the excessive err sweating and the pain in the chest um I*  
22 *could point to one and say look that was the main problem.. they were all a*  
23 *problem at that short period of time". (P 25)*  
24  
25  
26  
27  
28

### 29 30 31 32 Lack of awareness of MI symptoms or their increased risk of MI

33  
34 Many of these respondents, despite having long standing diabetes, previous cardiac  
35 events or a strong family history, seemed unaware that they were at a high risk of  
36 subsequent MI;  
37  
38

39  
40 *"I thought ...how can I have a heart attack? Right. But you see, this might be*  
41 *relevant as well; both my side of my family, my mother's side and my father's*  
42 *side are diabetic. My father had a heart attack as well and he died from it. My*  
43 *mother had a triple heart bypass. My elder brother's had an angioplasty, right,*  
44 *so it does run in the family" (P2)*  
45  
46  
47  
48

### 49 50 Experiences of a repeat MI

51  
52 Participants who had previous MIs might be expected to have a good working  
53 knowledge of these symptoms and respond accordingly if it recurred. We found  
54 however that often they did not do so;  
55  
56  
57  
58  
59  
60

1  
2  
3 *"I should have guessed, right, um, it's exactly the same symptoms as when I*  
4 *had my first heart attack". (P2)*  
5  
6

### 7 Language of pain

8

9  
10 The expectation of severe chest pain is key to many patients' and doctors' model of  
11 what an MI should be like and is apparent in some of the previous themes. However,  
12 many of these respondents had symptoms that they didn't feel reached a threshold  
13 of severity that they would call "pain";  
14  
15

16  
17 *"I suppose people would call it a pain, I don't know, I wouldn't, I would still call*  
18 *it severe discomfort...dull, rather than, no it wasn't sharp.... I won't put it (pain*  
19 *severity score) higher, otherwise I probably would have called an ambulance*  
20 *straight away", (P20)*  
21  
22

23  
24 *"No, it was a constant. When I say pain, ache, it wasn't a pain that was*  
25 *making me double up or anything". (P25)*  
26  
27

28 While some struggled to conceptualise their symptoms as pain, others struggled to  
29 use words to describe their symptoms;  
30  
31

32  
33 *"It's so difficult cos it was more uncomfortable than a pain that you can*  
34 *describe ... I don't know how to describe it". (P20)*  
35  
36

37 While others clearly had very significant pain but still struggled to articulate it;

38  
39 *"Indescribable to me, I couldn't, as I sit here I can't describe it... I had severe*  
40 *pain and it was; I don't know how you break it down into words". (P19)*  
41  
42

### 43 Knowing "something is wrong"

44

45  
46 Frequently participants had a "gut feeling" that there was something wrong or a  
47 strong emotional response to their symptoms;  
48  
49

50 *"You know, I could sort of feel that there was something wrong", (P2).*  
51

52  
53 *"And I thought I can't do this, I got to get 'elp, and that's when I dialled 999...*  
54 *and, you know, everything was going wrong, and I just couldn't figure out".*  
55 *(P3).*  
56  
57  
58  
59  
60

1  
2  
3 A “sense of doom” is often associated with the presentation of MI, but in this group  
4 only a few participants reported a strong sense of impending death;  
5  
6

7 *"I felt as if I was going to die (anxious voice)". (P6)*  
8  
9  
10  
11  
12  
13  
14  
15  
16  
17  
18  
19  
20  
21  
22  
23  
24  
25  
26  
27  
28  
29  
30  
31  
32  
33  
34  
35  
36  
37  
38  
39  
40  
41  
42  
43  
44  
45  
46  
47  
48  
49  
50  
51  
52  
53  
54  
55  
56  
57  
58  
59  
60



## Discussion

We found that patients with DM who experienced an MI exhibited a wide range of symptoms from very classical presentations to very mild symptoms.<sup>23</sup> Patients often were unclear what caused their symptoms.<sup>47</sup> This diagnostic confusion or uncertainty appears periodically to have been mirrored by clinicians.<sup>9 24</sup>

The symptoms experienced in this group ranged from those that may be expected by health care professionals, to more atypical symptoms with patients using unusual descriptive terms. The variation in experiences highlights the difficulty for both patients and healthcare providers to correctly attribute these symptoms to a cardiac event.

Patients with DM will often have other significant co-morbidities which can be attributed to their symptoms e.g. breathlessness from chronic obstructive pulmonary disease (COPD) rather than an MI. However, there seems to be an important area of confusion from symptoms related to DM and its control, that can lead to a misattribution of pain symptoms away from a new onset MI. A specific issue among this group is the impact of MI symptoms which were perceived as a side effect of medication (particularly insulin and oral hypoglycaemics). Interpreting episodes of hypoglycaemia and sudden onset MI seems to be particularly challenging with an overlap of many similar symptoms and their sudden onset.<sup>25</sup>

We found participants had a lack of knowledge of MI symptoms, were falsely reassured by the lack of severe pain or did not conceptualise their milder chest discomfort as chest pain. These factors may all lead to denial or confusion and therefore delay in seeking care.<sup>33</sup> Delay in seeking medical attention during an MI, will have significant prognostic implications.

As the participants' symptoms did not fit with their preconceived ideas of an MI,<sup>25</sup> they ascribed it to other less serious causes, or importantly attributed their symptoms to their DM, medication side effects or "hypos"; which is a novel and important finding. The attenuated chest pain competing with other, perhaps more distressing symptoms and so being "crowded out" from the illness cognition of a possible MI, has not been previously reported.

### Strengths

Within this study we have reported contemporaneous symptoms from a well described patient group, who can be characterised by their MI diagnosis. We have captured a wide range of participants with MI, by using biochemical confirmation of diagnosis wherever possible, but also by including clinical diagnoses (e.g. for cardiac arrests). Unusually for a qualitative study we have a relatively large number of participants, who were interviewed as early as possible (or allowed to) after the event to reduce recall bias.<sup>48</sup>

### Limitations

Despite recruiting participants on the basis of their MI diagnosis, but not specifically on chest pain presentations, participants are likely to have initially volunteered chest pain symptoms to get admitted to a coronary care unit. Markedly discrepant MI narratives are less likely to be represented in this study, as are silent MIs, as they are more likely to go unrecognised and present late. Survivor bias is also a distinct possibility.<sup>21</sup> While a study size of 39 is good for qualitative research,<sup>48</sup> it is small in comparison with epidemiological studies so this methodology is therefore unlikely to pick up rarer presentations of MI.

Recruiting on the basis of being able to converse in English will exclude the linguistic nuance of other languages and cultures; important when south Asian populations among others, have a high risk of DM and coronary heart disease. However, we did successfully capture many patients who had English as second language. Additionally the UK NHS struggles to provide reliable, accessible translation; particularly in the acute and out of hours setting, so our findings may more faithfully reflect the real world setting of these decisions and presentations.

Truncating these interviews into quotes also runs the danger of falsely dichotomising symptoms into “typical” and “atypical”. When the transcripts are read in full and in context, a more rounded picture of the event develops. This nuanced view is probably a key element that helps experienced clinicians successfully identify a potential MI, in this group of patients.

### How this fits into existing literature

The findings of our study link with previous work within a broad context of psychological models of illness behaviour such as health belief models.<sup>49</sup> We have used our findings to adapt Rosenstock and Kirsch's health belief model<sup>49</sup> (see figure 1) so that the impact of DM can modify the steps in the model such as reduced pain from neuropathy during an MI reducing the likelihood of action.

Diagram here (figure 1)

The language of describing pain and particularly the difficulty of describing pain recurs within our sample. Scarry describes this as the "inexpressibility of pain"<sup>50</sup> and this is seen with some respondents. Others use metaphor and simile to circumvent this issue, which may be helpful to the patient but means a clinician might cognitively process such symptom descriptions as "atypical" or "non cardiac", leading to misdiagnosis and delays in treatment. The term "chest pain" is also problematic<sup>38</sup>; many of these participants did not conceptualise their chest symptoms as pain and so, Miller has suggested using the term "chest sensation" instead.<sup>51</sup>

Our findings have some similarities to other studies about patients' experiences of MI.<sup>23 24 25 26</sup> The similarity of symptom presentation raises the possibility that these studies are just capturing the heterogeneous array of MI symptoms and this is unlinked to any underlying physiological or pathological process such as gender or DM. However, our finding of patient misattribution of MI symptoms to DM and diabetic medication, in a group at high risk of MI, does have significant clinical implications for patients and clinicians.

### Implications for further research

Despite knowing that people with DM are at much higher risk of coronary events we fail to inform patients in the UK about their increased cardio-vascular risk nor identify early those who may be developing such problems. Whether screening people with diabetes for ischaemic heart disease would be beneficial remains a key question. Possibilities include trialling patient education about their CHD risk and its

1  
2  
3 presentation in the UK Quality and Outcome (QOF) DM check or including this  
4 information within DESMOND (desmond-project.org.uk)/DAFNE ([www.dafne.uk.com](http://www.dafne.uk.com))  
5 patient education programmes, but there would be considerable difficulty in  
6 designing an educational package that could reliably help patients distinguish  
7 between these two aetiological possibilities of “hypo” versus MI.  
8  
9

### 10 Implications for practice

11  
12 This study could contribute towards increased awareness of MI in those with DM.  
13 Patients with DM should be made aware of their increased risk of cardiac events,  
14 how they present and how they differ from medication side effects and “hypos”.  
15 Clinicians should carefully explore patients with diabetes and their symptoms as well  
16 as their interpretation of their symptoms.  
17  
18  
19  
20  
21  
22

#### 23 a. Contributorship statement

24 All 3 authors fulfil all three of the ICMJE guidelines for authorship, MJ had the  
25 original study conception and design and then supervised NB during her iBSc  
26 project. NB collected all the data. NB and DDC analysed the final data set. MJ  
27 wrote the final manuscript with substantial intellectual input from NB and DDC.  
28 All authors approved the final manuscript.  
29  
30  
31  
32

#### 33 b. Competing interests

34 None  
35

#### 36 c. Funding

37 Royal College of General Practitioners’ Scientific foundation board (grant SFB  
38 2011-25). The original project was part of the UCL iBSc in primary health care  
39 and formed NB’s dissertation, supervised by MJ.  
40  
41  
42  
43

#### 44 d. Data sharing statement

45 No additional data are available as participants only consented to quotes  
46 being published.  
47  
48

### 49 Figure legend

50  
51 Figure 1: How diabetes (grey boxes) might affect the “Health Belief model” during  
52 MI  
53  
54

55 With permission from Fig 1. page 115 (adapted) from Victor J. Strecher and Irwin  
56 M. Rosenstock, “The health belief model”, Andrew Baum, Stanton Newman, John  
57 Weinman, Robert West, Chris McManus (eds.), (1997), “Cambridge Handbook of  
58  
59  
60

1  
2  
3 Psychology, Health and Medicine, 9780521436861, Cambridge : Cambridge  
4 University  
5  
6  
7  
8  
9  
10  
11  
12  
13

14  
15 Reference List  
16

- 17 1. González ELM, Johansson S, Wallander MA, et al. Trends in the prevalence and incidence of  
18 diabetes in the UK: 1996 to 2005. *Journal of Epidemiology and Community Health*  
19 2009;**63**(4):332-36.
- 20 2. Wannamethee SG, Shaper AG, Lennon L. Cardiovascular disease incidence and mortality in older  
21 men with diabetes and in men with coronary heart disease. *Heart* 2004;**90**(12):1398-403.
- 22 3. Shah AD, Langenberg C, Rapsomaniki E, et al. Type 2 diabetes and incidence of cardiovascular  
23 diseases: a cohort study in 1.9 million people. *The Lancet Diabetes & Endocrinology*  
24 2015;**3**(2):105-13.
- 25 4. . The Emerging Risk Factors Collaboration. Diabetes Mellitus, Fasting Glucose, and Risk of Cause-  
26 Specific Death. *New England Journal of Medicine* 2011;**364**(9):829-41.
- 27 5. Huxley R, Barzi F, Woodward M. Excess risk of fatal coronary heart disease associated with  
28 diabetes in men and women: meta-analysis of 37 prospective cohort studies. *BMJ*  
29 2006;**332**(7533):73-78.
- 30 6. Stamler J, Vaccaro O, Neaton JD, et al. Diabetes, other risk factors, and 12-yr cardiovascular  
31 mortality for men screened in the Multiple Risk Factor Intervention Trial. *Diabetes Care*  
32 1993;**16**(2):434-44.
- 33 7. Haffner SM, Lehto S, Ronnema T, et al. Mortality from Coronary Heart Disease in Subjects with  
34 Type 2 Diabetes and in Nondiabetic Subjects with and without Prior Myocardial Infarction.  
35 *The New England Journal of Medicine* 1998;**339**(4):229-34.
- 36 8. Brophy S, Cooksey R, Gravenor M, et al. Population based absolute and relative survival to 1 year  
37 of people with diabetes following a myocardial infarction: A cohort study using hospital  
38 admissions data. *BMC Public Health* 2010;**10**(1):338.
- 39 9. Sequist TD, Marshall R, Lampert S, et al. Missed opportunities in the primary care management of  
40 early acute ischemic heart disease. *Archives of Internal Medicine* 2006;**166**(20):2237-43.
- 41 10. Asaria P, Elliott P, Douglass M, et al. Acute myocardial infarction hospital admissions and deaths  
42 in England: a national follow-back and follow-forward record-linkage study. *The Lancet*  
43 *Public Health*;2017. 10.1016/S2468-2667(17)30032-4.
- 44 11. Ängerud KH, Brulin C, Näslund U, et al. Longer pre-hospital delay in first myocardial infarction  
45 among patients with diabetes: an analysis of 4266 patients in the Northern Sweden MONICA  
46 Study. *BMC Cardiovascular Disorders* 2013;**13**(1):6.
- 47 12. Canto JG, Shlipak MG, Rogers W.J., Malmgren JA, Frederick PD, Lambrew CT, Ornato JP, Barron  
48 HV, Kiefe C.I. Prevalence, clinical characteristics, and mortality among patients with  
49 myocardial infarction presenting without chest pain. *JAMA* 2000;**283**(24):3223-29.
- 50 13. Brieger D, Eagle KA, Goodman SG, et al. Acute Coronary Syndromes Without Chest Pain, An  
51 Underdiagnosed and Undertreated High-Risk Group: Insights From The Global Registry of  
52 Acute Coronary Events. *Chest* 2004;**126**(2):461-69.
- 53 14. Arslanian-Engoren C, Patel A, Fang J, et al. Symptoms of Men and Women Presenting With Acute  
54 Coronary Syndromes. *The American Journal of Cardiology* 2006;**98**(9):1177-81.
- 55  
56  
57  
58  
59  
60

15. Funk M, Naum JB, Milner KA, et al. Presentation and symptom predictors of coronary heart disease in patients with and without diabetes. *AmJ EmergMed* 2001;**19**(6):482-87.
16. Kentsch M RU, Gitt AK, Schiele R, Wienbergen H, Schubert J, Muller-Esch G, Ittel TH, Mitusch R, Tschoepe D, Senges J. Angina intensity is not different in diabetic and non-diabetic patients with acute myocardial infarction. *Zeitschrift fur Kardiologie* 2003;**92**(10):817-24.
17. Stephen SA, Darney BG, Rosenfeld AG. Symptoms of acute coronary syndrome in women with diabetes: An integrative review of the literature. *Heart & Lung: The Journal of Acute and Critical Care* 2005;**37**(3):179-89.
18. DeVon HA, Penckofer SM, Zerwic JJ. Symptoms of unstable angina in patients with and without diabetes. *ResNursHealth* 2005;**28**(2):136-43.
19. Richman PB, Brogan GX, Nashed AN, et al. Clinical Characteristics of Diabetic vs Nondiabetic Patients Who "Rule-in" for Acute Myocardial Infarction. *Academic Emergency Medicine* 1999;**6**(7):719-23.
20. Airaksinen KE, Koistinen MJ. Association between silent coronary artery disease, diabetes, and autonomic neuropathy. Fact of fallacy? *Diabetes Care* 1992;**15**(2):288-92.
21. Saracci R. Survival-related biases survive well. *International Journal of Epidemiology* 2007;**36**(1):244-46.
22. Braun V, Clarke V. What can "thematic analysis" offer health and wellbeing researchers? *International Journal of Qualitative Studies on Health and Well-being*; Vol 9 (2014) 2014.
23. Lichtman JH, Leifheit-Limson EC, Watanabe E, et al. Symptom Recognition and Healthcare Experiences of Young Women With Acute Myocardial Infarction. *Circulation: Cardiovascular Quality and Outcomes* 2015;**8**(2 suppl 1):S31-S38.
24. Coventry LL, van Schalkwyk JW, Thompson P, et al. Myocardial infarction, patient decision delay and help seeking behaviour: a thematic analysis. *Journal of Clinical Nursing* 2016:DOI: 10.1111/jocn.13607.
25. Ängerud KH, Brulin C, Eliasson M, et al. The Process of Care-seeking for Myocardial Infarction Among Patients With Diabetes. *The Journal of Cardiovascular Nursing* 2015;**30**(5):E1-E8.
26. DeVon HA, Hogan N, Ochs AL, et al. Time to Treatment for Acute Coronary Syndromes: The Cost of Indecision. *Journal of Cardiovascular Nursing* 2010;**25**(2):106-14.
27. MacDermott AF. Living with angina pectoris--a phenomenological study. *Eur J CardiovascNurs* 2002;**1**(4):265-72.
28. Tod AM, Read C, Lacey A, et al. Barriers to uptake of services for coronary heart disease: qualitative study. *BMJ* 2001;**323**(7306):214.
29. Fitzsimons D, Parahoo K, Richardson SG, et al. Patient anxiety while on a waiting list for coronary artery bypass surgery: a qualitative and quantitative analysis. *Heart Lung* 2003;**32**(1):23-31.
30. Johansson I, Swahn E, Strömberg A. Manageability, vulnerability and interaction: A qualitative analysis of acute myocardial infarction patients' conceptions of the event. *European Journal of Cardiovascular Nursing* 2007;**6**(3):184-91.
31. Nymark C, Mattiasson A-C, Henriksson P, et al. The turning point: from self-regulative illness behaviour to care-seeking in patients with an acute myocardial infarction. *Journal of Clinical Nursing* 2009;**18**(23):3358-65.
32. Pattenden J, Watt I, Lewin RJP, et al. Decision making processes in people with symptoms of acute myocardial infarction: qualitative study. *BMJ* 2002;**324**(7344):1006.
33. Dracup K, Moser DK, Eisenberg M, et al. Causes of delay in seeking treatment for heart attack symptoms. *Social Science & Medicine* 1995;**40**(3):379-92.
34. Emslie C, Hunt K, Watt G. "I'd rather go with a heart attack than drag on": lay images of heart disease and the problems they present for primary and secondary prevention. *Coronary Health Care* 2001;**5**:25-32.

- 1
- 2
- 3 35. Stephen SA, Darney BG, Rosenfeld AG. Symptoms of acute coronary syndrome in women with
- 4 diabetes: An integrative review of the literature. *Heart & Lung: The Journal of Acute and*
- 5 *Critical Care* 2008;**37**(3):179-89.
- 6
- 7 36. White AK, Johnson M. Men making sense of their chest pain--niggles, doubts and denials. *J Clin*
- 8 *Nurs* 2000;**9**(4):534-41.
- 9
- 10 37. Mayer D D.; Rosenfeld A. Symptom interpretation in women with diabetes and myocardial
- 11 infarction: a qualitative study. *Diabetes Educator* 2006;**32**(6):918-24.
- 12
- 13 38. Treasure T. Pain is not the only feature of heart attack. *BMJ* 1998;**317**:602.
- 14
- 15 39. Albarran JW, Clarke BA, Crawford J. 'It was not chest pain really, I can't explain it!' An exploratory
- 16 study on the nature of symptoms experienced by women during their myocardial infarction.
- 17 *J Clin Nurs* 2007;**16**(7):1292-301.
- 18
- 19 40. Farmer SA, Higginson IJ. Chest Pain: Physician Perceptions and Decision making in a London
- 20 Emergency Department. *Annals of Emergency Medicine* 2006;**48**(1):77-85.
- 21
- 22 41. Jones MM, Somerville C, Feder G, et al. Patients' descriptions of angina symptoms: a qualitative
- 23 study of primary care patients. *BrJGenPract* 2010;**60**:735-41.
- 24
- 25 42. Thygesen K, Alpert JS, White HD, et al. Universal Definition of Myocardial Infarction. *Circulation*
- 26 2007;**116**(22):2634-53.
- 27
- 28 43. Emmel N. *Sampling and choosing cases in qualitative research: a realist approach*. London 2013:
- 29 Sage.
- 30
- 31 44. Diamond GA, Forrester JS. Analysis of probability as an aid in the clinical diagnosis of coronary-
- 32 artery disease. *NEngJ Med* 1979;**300**(24):1350-58.
- 33
- 34 45. Kleinman A. *The illness narratives: Suffering, healing, and the human condition*: Basic books,
- 35 1988.
- 36
- 37 46. Ritchie J, Spencer E. *Qualitative data analysis for applied policy research*. London: Routledge,
- 38 1994.
- 39
- 40 47. Kirchberger I, Heier M, Wende R, et al. The patient's interpretation of myocardial infarction
- 41 symptoms and its role in the decision process to seek treatment: the MONICA/KORA
- 42 Myocardial Infarction Registry. *Clinical Research in Cardiology* 2012;**101**(11):909-16.
- 43
- 44 48. Baker SE, Edwards R. How many qualitative interviews is enough? Expert voices and early career
- 45 reflections on sampling and cases in qualitative research. Secondary How many qualitative
- 46 interviews is enough? Expert voices and early career reflections on sampling and cases in
- 47 qualitative research 2012. [http://eprints.ncrm.ac.uk/2273/4/how\\_many\\_interviews.pdf](http://eprints.ncrm.ac.uk/2273/4/how_many_interviews.pdf)
- 48
- 49 49. Strecher VJ, Rosenstock IM. The health belief model. *Cambridge handbook of psychology, health*
- 50 *and medicine* 1997:113-17.
- 51
- 52 50. Scarry E. *The body in pain*. New York: Oxford University Press, 1985.
- 53
- 54 51. Miller CL. Symptom reflections of women with cardiac disease and advanced practice nurses: a
- 55 descriptive study. *ProgCardiovascNurs* 2003;**18**(2):69-76.
- 56
- 57
- 58
- 59
- 60

1  
2  
3  
4  
5  
6  
7  
8  
9  
10  
11  
12  
13  
14  
15  
16  
17  
18  
19  
20  
21  
22  
23  
24  
25  
26  
27  
28  
29  
30  
31  
32  
33  
34  
35  
36  
37  
38  
39  
40  
41  
42  
43  
44  
45  
46  
47  
48  
49  
50  
51  
52  
53  
54  
55  
56  
57  
58  
59  
60

Figure 1: How diabetes (grey boxes) might affect the "Health Belief model" during MI  
 With permission from Fig 1, page 115 (adapted) from Victor J. Strecher and Irwin M. Rosenstock, "The health belief model", Andrew Baum, Stanton Newman, John Weinmar, Robert West, Chris McManus (eds.), (1997), "Cambridge Handbook of Psychology, Health and Medicine, 9780521436861, Cambridge : Cambridge University

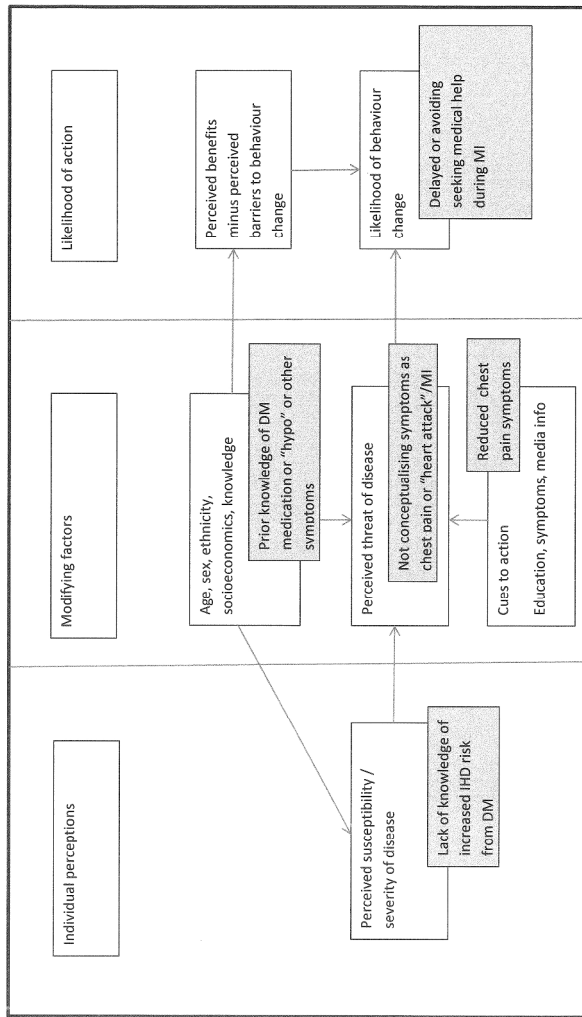

Figure 1- How diabetes (grey boxes) might effect the health belief model during MI

296x419mm (300 x 300 DPI)



|                                                        | Item                                     | Guide questions/description                                                                                                                      | Author completed                                                                          | Location (using PDF pagination)                      |
|--------------------------------------------------------|------------------------------------------|--------------------------------------------------------------------------------------------------------------------------------------------------|-------------------------------------------------------------------------------------------|------------------------------------------------------|
| <b>Domain 1:<br/>Research team<br/>and reflexivity</b> |                                          |                                                                                                                                                  |                                                                                           |                                                      |
| Personal<br>Characteristics                            |                                          |                                                                                                                                                  |                                                                                           |                                                      |
| 1                                                      | Interviewer/<br>facilitator              | Which author/s conducted the interview or focus group?                                                                                           | NB                                                                                        | See Methods p7                                       |
| 2                                                      | Credentials                              | What were the researcher's credentials? <i>E.g. PhD, MD</i>                                                                                      | MD MSc (MJ) undergraduate (NB), BSc (DDC)                                                 | Online submission details                            |
| 3                                                      | Occupation                               | What was their occupation at the time of the study?                                                                                              | Sen Lect (MJ), MB BS / iBSc student (NB), student/junior doc (DDC)                        | p1                                                   |
| 4                                                      | Gender                                   | Was the researcher male or female?                                                                                                               | Both genders                                                                              | Not documented                                       |
| 5                                                      | Experience and training                  | What experience or training did the researcher have?                                                                                             | MJ extensive research and research supervision, NK / DDC developed expertise during study | Not documented                                       |
| Relationship with participants                         |                                          |                                                                                                                                                  |                                                                                           |                                                      |
| 6                                                      | Relationship established                 | Was a relationship established prior to study commencement?                                                                                      | No but there was a "cool off" period between approach and consent                         | Methods p7                                           |
| 7                                                      | Participant knowledge of the interviewer | What did the participants know about the researcher? <i>e.g. personal goals, reasons for doing the research</i>                                  | Information as set out in pt info leaflet as agreed by IRC/ ethics committee              | Methods section p7                                   |
| 8                                                      | Interviewer characteristics              | What characteristics were reported about the interviewer/facilitator? <i>e.g. Bias, assumptions, reasons and interests in the research topic</i> | NK identified as medical student, MJ as academic and clinician                            | Patient information sheet (PIS) available on request |

|    |                               |                                       |                                                                                                                                                                 |                                                                                                                                       |                     |
|----|-------------------------------|---------------------------------------|-----------------------------------------------------------------------------------------------------------------------------------------------------------------|---------------------------------------------------------------------------------------------------------------------------------------|---------------------|
| 1  | <b>Domain 2: study design</b> |                                       |                                                                                                                                                                 |                                                                                                                                       |                     |
| 2  |                               |                                       |                                                                                                                                                                 |                                                                                                                                       |                     |
| 3  | Theoretical framework         |                                       |                                                                                                                                                                 |                                                                                                                                       |                     |
| 4  |                               |                                       |                                                                                                                                                                 |                                                                                                                                       |                     |
| 5  |                               |                                       |                                                                                                                                                                 |                                                                                                                                       |                     |
| 6  |                               |                                       |                                                                                                                                                                 |                                                                                                                                       |                     |
| 7  |                               |                                       |                                                                                                                                                                 |                                                                                                                                       |                     |
| 8  |                               |                                       |                                                                                                                                                                 |                                                                                                                                       |                     |
| 9  | 9                             | Methodological orientation and Theory | What methodological orientation was stated to underpin the study? <i>e.g. grounded theory, discourse analysis, ethnography, phenomenology, content analysis</i> | Thematic analysis (Ritchie and Spencer)                                                                                               | Methods section p 8 |
| 10 |                               |                                       |                                                                                                                                                                 |                                                                                                                                       |                     |
| 11 |                               |                                       |                                                                                                                                                                 |                                                                                                                                       |                     |
| 12 |                               |                                       |                                                                                                                                                                 |                                                                                                                                       |                     |
| 13 |                               |                                       |                                                                                                                                                                 |                                                                                                                                       |                     |
| 14 |                               |                                       |                                                                                                                                                                 |                                                                                                                                       |                     |
| 15 |                               |                                       |                                                                                                                                                                 |                                                                                                                                       |                     |
| 16 |                               |                                       |                                                                                                                                                                 |                                                                                                                                       |                     |
| 17 | Participant selection         |                                       |                                                                                                                                                                 |                                                                                                                                       |                     |
| 18 |                               |                                       |                                                                                                                                                                 |                                                                                                                                       |                     |
| 19 |                               |                                       |                                                                                                                                                                 |                                                                                                                                       |                     |
| 20 | 10                            | Sampling                              | How were participants selected? <i>e.g. purposive, convenience, consecutive, snowball</i>                                                                       | Pragmatic sample                                                                                                                      | Methods section p 7 |
| 21 |                               |                                       |                                                                                                                                                                 |                                                                                                                                       |                     |
| 22 |                               |                                       |                                                                                                                                                                 |                                                                                                                                       |                     |
| 23 |                               |                                       |                                                                                                                                                                 |                                                                                                                                       |                     |
| 24 |                               |                                       |                                                                                                                                                                 |                                                                                                                                       |                     |
| 25 |                               |                                       |                                                                                                                                                                 |                                                                                                                                       |                     |
| 26 |                               |                                       |                                                                                                                                                                 |                                                                                                                                       |                     |
| 27 |                               |                                       |                                                                                                                                                                 |                                                                                                                                       |                     |
| 28 | 11                            | Method of approach                    | How were participants approached? <i>e.g. face-to-face, telephone, mail, email</i>                                                                              | Prior selection by clinical team (to establish well enough to participate), approach with PIS by researcher, and “cooling off” period | Methods section p 7 |
| 29 |                               |                                       |                                                                                                                                                                 |                                                                                                                                       |                     |
| 30 |                               |                                       |                                                                                                                                                                 |                                                                                                                                       |                     |
| 31 |                               |                                       |                                                                                                                                                                 |                                                                                                                                       |                     |
| 32 |                               |                                       |                                                                                                                                                                 |                                                                                                                                       |                     |
| 33 |                               |                                       |                                                                                                                                                                 |                                                                                                                                       |                     |
| 34 |                               |                                       |                                                                                                                                                                 |                                                                                                                                       |                     |
| 35 | 12                            | Sample size                           | How many participants were in the study?                                                                                                                        | 43 recruited, 39 analysed                                                                                                             | Results section p10 |
| 36 |                               |                                       |                                                                                                                                                                 |                                                                                                                                       |                     |
| 37 |                               |                                       |                                                                                                                                                                 |                                                                                                                                       |                     |
| 38 |                               |                                       |                                                                                                                                                                 |                                                                                                                                       |                     |
| 39 |                               |                                       |                                                                                                                                                                 |                                                                                                                                       |                     |
| 40 | 13                            | Non-participation                     | How many people refused to participate or dropped out? Reasons?                                                                                                 | Numbers who refused to participate was not recorded. Two participants requested the interview to be terminated before completion.     | Results section p10 |
| 41 |                               |                                       |                                                                                                                                                                 |                                                                                                                                       |                     |
| 42 |                               |                                       |                                                                                                                                                                 |                                                                                                                                       |                     |
| 43 |                               |                                       |                                                                                                                                                                 |                                                                                                                                       |                     |
| 44 |                               |                                       |                                                                                                                                                                 |                                                                                                                                       |                     |
| 45 |                               |                                       |                                                                                                                                                                 |                                                                                                                                       |                     |
| 46 | Setting                       |                                       |                                                                                                                                                                 |                                                                                                                                       |                     |
| 47 |                               |                                       |                                                                                                                                                                 |                                                                                                                                       |                     |
| 48 |                               |                                       |                                                                                                                                                                 |                                                                                                                                       |                     |
| 49 | 14                            | Setting of data collection            | Where was the data collected? <i>e.g. home, clinic, workplace</i>                                                                                               | On hospital ward (including coronary care unit)                                                                                       | Methods section p7  |
| 50 |                               |                                       |                                                                                                                                                                 |                                                                                                                                       |                     |
| 51 |                               |                                       |                                                                                                                                                                 |                                                                                                                                       |                     |
| 52 |                               |                                       |                                                                                                                                                                 |                                                                                                                                       |                     |
| 53 |                               |                                       |                                                                                                                                                                 |                                                                                                                                       |                     |
| 54 | 15                            | Presence of non-participants          | Was anyone else present besides the participants and researchers?                                                                                               | Occasionally patients’ relatives stayed during the interview (n=2).                                                                   | Results section P10 |
| 55 |                               |                                       |                                                                                                                                                                 |                                                                                                                                       |                     |
| 56 |                               |                                       |                                                                                                                                                                 |                                                                                                                                       |                     |
| 57 |                               |                                       |                                                                                                                                                                 |                                                                                                                                       |                     |
| 58 |                               |                                       |                                                                                                                                                                 |                                                                                                                                       |                     |
| 59 |                               |                                       |                                                                                                                                                                 |                                                                                                                                       |                     |
| 60 |                               |                                       |                                                                                                                                                                 |                                                                                                                                       |                     |

|                                        |                        |                                                                                          |                                                                                                                                                                                                                                                       |                             |
|----------------------------------------|------------------------|------------------------------------------------------------------------------------------|-------------------------------------------------------------------------------------------------------------------------------------------------------------------------------------------------------------------------------------------------------|-----------------------------|
| 16                                     | Description of sample  | What are the important characteristics of the sample? <i>e.g. demographic data, date</i> | Participants (n=39) were predominantly male (n=30), aged 40-90 years and white British (18/39), just over a half were from other ethnic groups. The majority had type II DM (n=35); 24 had an NSTEMI, 10 had an STEMI and 5 had other cardiac events. | Results section table 1 p11 |
| Data collection                        |                        |                                                                                          |                                                                                                                                                                                                                                                       |                             |
| 17                                     | Interview guide        | Were questions, prompts, guides provided by the authors? Was it pilot tested?            | Yes                                                                                                                                                                                                                                                   | Methods section p7          |
| 18                                     | Repeat interviews      | Were repeat interviews carried out? If yes, how many?                                    | No                                                                                                                                                                                                                                                    | Methods section p7          |
| 19                                     | Audio/visual recording | Did the research use audio or visual recording to collect the data?                      | Audio-recording                                                                                                                                                                                                                                       | Methods section p7          |
| 20                                     | Field notes            | Were field notes made during and/or after the interview or focus group?                  | Yes                                                                                                                                                                                                                                                   | Methods section p7          |
| 21                                     | Duration               | What was the duration of the interviews or focus group?                                  | 5-48 minutes                                                                                                                                                                                                                                          | Results section p10         |
| 22                                     | Data saturation        | Was data saturation discussed?                                                           | Yes                                                                                                                                                                                                                                                   | Results p10                 |
| 23                                     | Transcripts returned   | Were transcripts returned to participants for comment and/or correction?                 | No as no identifiable data was removed from the ward                                                                                                                                                                                                  | See methods p7              |
| <b>Domain 3: analysis and findings</b> |                        |                                                                                          |                                                                                                                                                                                                                                                       |                             |
| Data analysis                          |                        |                                                                                          |                                                                                                                                                                                                                                                       |                             |

|           |                                |                                                                                                                                          |                                                                   |                    |
|-----------|--------------------------------|------------------------------------------------------------------------------------------------------------------------------------------|-------------------------------------------------------------------|--------------------|
| 24        | Number of data coders          | How many data coders coded the data?                                                                                                     | Two                                                               | Methods section p8 |
| 25        | Description of the coding tree | Did authors provide a description of the coding tree?                                                                                    | Thematic analysis was recorded as an excel spreadsheet not a tree | Methods section p8 |
| 26        | Derivation of themes           | Were themes identified in advance or derived from the data?                                                                              | Data derived                                                      | See methods p8     |
| 27        | Software                       | What software, if applicable, was used to manage the data?                                                                               | Spreadsheet and word processing software                          | See methods p8     |
| 28        | Participant checking           | Did participants provide feedback on the findings?                                                                                       | No (see previous comments)                                        | Methods section P8 |
| Reporting |                                |                                                                                                                                          |                                                                   |                    |
| 29        | Quotations presented           | Were participant quotations presented to illustrate the themes / findings? Was each quotation identified? e.g. <i>participant number</i> | Yes identified by participant number.                             | See methods p8     |
| 30        | Data and findings consistent   | Was there consistency between the data presented and the findings?                                                                       | Yes                                                               | Results p 10-20    |
| 31        | Clarity of major themes        | Were major themes clearly presented in the findings?                                                                                     | Yes                                                               | See results p10-20 |
| 32        | Clarity of minor themes        | Is there a description of diverse cases or discussion of minor themes?                                                                   | Yes                                                               | See results p10-20 |
